# Supplementary material for: GOOGA: A platform to synthesize mapping experiments and identify genomic structural diversity
Source: PLoS Comput Biol. 2019 Apr 15;15(4):e1006949. doi: 10.1371/journal.pcbi.1006949 (PMC6483263; doi:10.1371/journal.pcbi.1006949)
Supplement: S1 Table — (XLSX) [file pcbi.1006949.s018.xlsx]

## Sheet: Sheet1
Genotype Error rates for each plant of each mapping population: e0 = homozygote to heterozygote, e1 = homozygote to alternative homozygote, e2 = heterozygote to either homozygote.
F2 or F3 mapping population		e0	e1	e2	LL		Plants used		RIL mapping population		e1	LL		Plants used
SF									IMPR
01_39	1803	0.0049001	1e-05	1e-05	-485.488		02_93		r226	1428	0.000392773	-275.222		r547
03_50	1805	0.00338465	1e-05	0.00160799	-491.902		03_19		r781	1605	0.000371575	-317.216		r559
02_63	1781	0.00493558	1e-05	1e-05	-518.069		04_21		r474	1552	0.000362556	-325.269		r60
03_38	1784	0.00784968	1e-05	0.00149857	-530.79		01_63		r97	1773	0.000353885	-329.043		r564
01_22	1766	0.00197228	1e-05	1e-05	-443.214		03_21		r535	1535	0.000318626	-307.755		r863
03_29	1766	0.00368495	1e-05	0.000849854	-491.133		02_52		r329	1900	0.000258789	-353.48		r837
03_52	1771	0.00299352	0.000855575	1e-05	-526.2		01_50		r393	1778	0.000239146	-315.375		r54
02_24	1788	1e-05	1e-05	0.0024107	-454.8		02_41		r155	1782	0.000238846	-311.327		r319
04_41	1749	0.00142912	1e-05	0.00257727	-555.707		03_36		r751	1716	6.57e-05	-321.875		r716
03_14	1770	0.0051579	1e-05	1e-05	-550.112		04_66		r547	1494	1e-06	-285.339		r155
01_24	1766	0.00272315	1e-05	0.00339617	-529.684		02_01		r559	1269	1e-06	-243.991		r586
02_59	1751	0.00513527	1e-05	1e-05	-533.329		01_25		r60	1657	1e-06	-318.23		r553
02_35	1766	0.00259437	1e-05	0.00330026	-485.562		03_49		r564	1425	1e-06	-247.673		r266
04_06	1655	0.00684224	1e-05	0.00378834	-512.544		04_24		r863	1816	1e-06	-327.21		r401
03_35	1728	0.00780107	1e-05	0.00152088	-510.951		04_27		r837	1928	1e-06	-330.686		r641
03_47	1730	0.00394538	1e-05	0.00651659	-460.533		04_50		r54	1364	1e-06	-260.262		r325
01_89	1694	0.00475949	1e-05	1e-05	-507.229		03_12		r319	1562	1e-06	-274.424		r858
01_59	1587	0.000484829	1e-05	0.000814976	-395.581		01_52		r716	1523	1e-06	-291.856		r874
02_31	1674	0.00250455	1e-05	1e-05	-509.808		04_05		r586	1489	1e-06	-287.325		r566
01_03	1688	0.0108724	0.0030834	0.00108384	-453.72		02_49		r553	1649	1e-06	-310.7		r861
03_66	1691	0.00769003	1e-05	0.00296511	-509.839		02_58		r266	1926	1e-06	-340.557		r204
03_33	1681	0.00922392	1e-05	0.00213624	-491.227		04_26		r401	1887	1e-06	-308.25		r763
01_10	1555	0.0135332	1e-05	0.00092529	-444.1		02_40		r641	1614	1e-06	-310.148		r287
01_69	1645	0.0121397	1e-05	0.00530663	-533.265		02_76		r325	1900	1e-06	-337.48		r562
04_34	1567	0.00561434	1e-05	0.00914528	-474.238		02_75		r858	1860	1e-06	-343.647		r573
02_61	1644	0.00839838	1e-05	0.00820722	-514.136		02_47		r874	1940	1e-06	-332.541		r41
02_53	1573	0.00227538	1e-05	0.00513424	-483.562		02_81		r566	1734	1e-06	-322.174		r499
01_60	1478	0.00851756	1e-05	0.0037937	-491.942		01_15		r861	1807	1e-06	-355.579		r465
02_55	1640	0.0109511	1e-05	0.00699821	-541.938		01_78		r204	1872	1e-06	-336.872		r575
04_64	1495	0.011921	1e-05	0.0101325	-515.128		04_47		r763	1962	1e-06	-353.352		r729
03_04	1576	0.01026	0.00110861	0.00964994	-538.044		02_37		r287	1939	1e-06	-337.087		r537
02_42	1630	0.00919076	1e-05	0.00601186	-562.704		02_60		r562	1785	1e-06	-339.625		r733
01_49	1544	0.0261536	1e-05	0.0111122	-542.564		03_08		r573	1616	1e-06	-301.133		r368
03_05	1594	0.00532397	1e-05	0.0095796	-506.554		01_54		r41	1334	1e-06	-274.001		r415
04_55	1474	0.0115997	1e-05	0.00980036	-458.647		04_32		r499	1834	1e-06	-308.051		r329
02_79	1611	0.00197111	1e-05	0.00677948	-488.48		01_68		r465	1528	1e-06	-301.307		r766
03_65	1580	0.00360533	1e-05	0.0133588	-517.191		02_83		r575	1270	1e-06	-247.224		r338
01_43	1460	0.0161512	1e-05	0.00953441	-491.739		01_47		r729	1573	1e-06	-269.41		r330
03_37	1550	0.0128312	1e-05	0.0121629	-486.338		03_26		r537	1392	1e-06	-265.756		r828
04_26	1511	0.0164589	1e-05	0.0292176	-606.936		01_70		r733	1378	1e-06	-278.364		r100
03_86	1417	0.0115513	1e-05	0.0133265	-443.12		03_65		r368	1965	1e-06	-343.538		r592
02_83	1500	0.0248872	0.0013624	0.015664	-602.458		03_86		r415	1855	1e-06	-343.08		r19
04_47	1488	0.0261767	1e-05	0.0210466	-644.536		02_44		r766	1933	1e-06	-343.753		r590
03_08	1487	0.0208645	1e-05	0.0186622	-599.561		02_62		r338	1961	1e-06	-348.287		r856
03_26	1517	0.00428145	0.000855459	0.0140904	-540.876		01_51		r330	1717	1e-06	-328.32		r446
04_66	1465	0.0230474	1e-05	0.0434588	-685.439		02_68		r828	1726	1e-06	-330.707		r688
02_81	1483	0.0106267	1e-05	0.0235537	-547.716		03_37		r100	1346	1e-06	-265.518		r870
04_50	1428	0.0183954	0.00156417	0.0345235	-578.446		02_72		r592	1638	1e-06	-295.524		r657
04_29	1362	0.480153	1e-05	0.00988086	-472.623		01_49		r19	1916	1e-06	-332.927		r526
04_13	1300	0.175509	1e-05	0.00119868	-368.081		04_64		r590	1488	1e-06	-274.318		r153
01_47	1463	0.00349528	1e-05	0.0154533	-505.053		04_55		r856	1517	1e-06	-286.48		r634
01_51	1445	0.00347562	0.00106427	0.0132351	-527.677		03_04		r446	1865	1e-06	-345.482		r831
04_32	1353	0.0486123	1e-05	0.0162169	-533.383		03_05		r688	1234	1e-06	-269.751		r310
04_05	1411	0.0387336	0.00251621	0.0318831	-576.664		01_43		r870	1748	1e-06	-306.39		r855
02_68	1435	0.00537432	1e-05	0.0128118	-444.378		02_70		r657	1356	1e-06	-274.729		r717
01_68	1380	0.0293957	1e-05	0.0160807	-499.316		04_34		r526	1925	1e-06	-377.013		r878
02_62	1463	0.00593495	1e-05	0.0132449	-462.65		02_61		r153	1924	1e-06	-341.063		r218
04_51	1233	0.0458666	1e-05	0.00337551	-475.084		02_54		r634	1427	1e-06	-286.086		r804
04_21	1371	0.0242564	0.000351095	0.0528957	-661.758		02_55		r831	1862	1e-06	-357.821		r779
01_33	1368	0.0367115	0.00331777	0.00407952	-518.145		02_79		r310	1757	1e-06	-306.97		r538
02_44	1436	0.0128942	1e-05	0.0133178	-502.666		03_47		r855	1896	1e-06	-319.466		r359
02_54	1438	0.00404274	1e-05	0.00808995	-475.128		02_42		r717	1416	1e-06	-274.24		r760
04_24	1349	0.0380394	1e-05	0.0369002	-568.762		01_69		r878	1943	1e-06	-341.259		r123
01_54	1357	0.0711833	1e-05	0.0168442	-522.445		02_53		r218	1911	1e-06	-364.738		r714
01_70	1297	0.0226847	1e-05	0.0135606	-548.265		01_33		r804	1837	1e-06	-349.258		r216
04_27	1359	0.0588444	1e-05	0.036807	-558.666		01_60		r779	1765	1e-06	-325.757		r382
02_37	1418	0.00580135	1e-05	0.0189229	-501.311		04_06		r538	1326	1e-06	-257.105		r118
01_19	1258	0.175635	0.00455378	0.00252606	-383.881		01_24		r359	1789	1e-06	-336.833		r785
01_80	1390	0.0120528	1e-05	0.00239973	-460.896		04_51		r760	1916	1e-06	-335.659		r474
02_72	1395	0.00958174	1e-05	0.0114393	-498.258		02_35		r123	1238	1e-06	-251.039		r148
04_63	1244	0.0889604	1e-05	0.0502701	-610.218		03_66		r714	1467	1e-06	-284.152		r304
02_49	1275	0.00666139	0.00110528	0.0306866	-509.614		04_41		r216	1258	1e-06	-255.779		r36
03_12	1229	0.0121821	1e-05	0.0324445	-479.16		01_85		r382	1748	1e-06	-322.832		r603
03_49	1225	0.0161074	1e-05	0.0400012	-532.572		02_24		r118	1865	1e-06	-323.493		r876
01_85	1194	0.0292272	1e-05	0.0025155	-455.864		01_80		r785	1800	1e-06	-330.448		r512
02_47	1234	0.00750001	1e-05	0.0258472	-467.945		03_33		r148	1438	1e-06	-275.649		r523
03_36	1177	0.00864024	0.00443128	0.0465135	-503.067		03_50		r304	1837	1e-06	-318.016		r625
01_15	1138	0.0948076	1e-05	0.0231565	-576.896		03_35		r36	1782	1e-06	-329.154		r14
01_52	1184	0.0388049	0.00190525	0.032221	-532.901		03_38		r603	1328	1e-06	-284.697		r877
03_90	1129	0.0511331	1e-05	0.0855211	-621.248		01_03		r876	1914	1e-06	-339.239		r400
03_21	1144	1e-05	0.0008546	0.0500778	-473.746		01_10		r512	1241	1e-06	-262.057		r178
01_32	1118	0.127734	0.00144176	0.0353196	-618.301		03_29		r523	1906	1e-06	-323.676		r311
03_73	1079	0.145544	1e-05	0.0739277	-643.572		01_59		r625	1492	1e-06	-279.783		r451
04_02	1097	0.0817714	0.00189693	0.0830285	-648.645		03_52		r14	1601	1e-06	-296.989		r765
01_56	1100	0.0687459	1e-05	0.0673751	-594.512		03_14		r877	1926	1e-06	-357.407		r817
04_15	1090	0.1778	1e-05	0.0678833	-620.052		02_59		r400	1845	1e-06	-345.665		r579
01_02	1082	0.0927704	1e-05	0.0356412	-550.597		02_63		r178	1667	1e-06	-291.475		r137
02_75	1055	0.0942363	1e-05	0.0268009	-529.342		01_39		r311	1902	1e-06	-352.809		r599
01_78	1085	0.0104197	1e-05	0.0224083	-420.237		01_89		r451	1788	1e-06	-327.907		r34
01_63	1064	0.0488472	1e-05	0.0503228	-540.681		02_31		r765	1635	1e-06	-303.473		r108
02_40	1052	1e-05	1e-05	0.0286033	-406.893		01_22		r817	1752	1e-06	-329.227		r868
01_45	1017	0.302342	1e-05	0.0289502	-490.143				r579	1682	1e-06	-336.761		r294
03_19	1057	0.00723256	0.000283298	0.0598938	-454.096				r137	1597	1e-06	-292.457		r787
02_60	1033	0.0101125	1e-05	0.0188676	-399.423				r599	1340	1e-06	-260.802		r491
04_39	983	0.129965	1e-05	0.133726	-697.295				r34	1248	1e-06	-250.793		r734
02_52	1013	0.0109325	1e-05	0.047843	-455.277				r108	1715	1e-06	-298.845		r458
03_02	1002	0.00862387	0.000417538	0.0979891	-539.025				r868	1675	1e-06	-335.602		r799
03_69	973	0.12084	0.000827748	0.119206	-650.024				r294	1874	1e-06	-342.751		r755
02_70	1009	0.0259143	1e-05	0.00924314	-408.286				r787	1582	1e-06	-290.18		r609
02_90	966	0.0836822	0.0024026	0.0424651	-484.694				r491	1366	1e-06	-281.326		r316
02_76	973	0.00432097	1e-05	0.0275495	-410.437				r734	1383	1e-06	-267.467		r317
02_93	962	0.0144552	1e-05	0.0790973	-490.262				r458	1254	1e-06	-261.057		r305
01_76	955	0.207952	1e-05	0.0956108	-647.524				r799	1573	1e-06	-291.955		r826
04_04	937	0.0328018	1e-05	0.159377	-607.926				r755	1655	1e-06	-294.977		r361
01_12	948	0.150955	1e-05	0.0717136	-588.711				r609	1849	1e-06	-325.117		r758
03_59	917	0.279214	1e-05	0.0578034	-573.758				r316	1458	1e-06	-272.302		r836
01_50	929	0.0514551	1e-05	0.0470856	-477.054				r317	1766	1e-06	-323.314		r796
01_25	936	0.048715	1e-05	0.0410287	-478.555				r305	1816	1e-06	-319.83		r669
03_77	920	0.0259932	0.000685542	0.166642	-619.923				r826	1891	1e-06	-322.809		r346
01_38	902	0.455462	1e-05	0.0788992	-567.114				r361	1378	1e-06	-270.373		r671
04_14	836	0.0106986	1e-05	0.304278	-520.369				r758	1793	1e-06	-319.151		r724
04_56	829	0.0623207	0.00427203	0.159317	-556.603				r836	1884	1e-06	-324.06		r70
04_40	818	0.116364	1e-05	0.151143	-598.25				r796	1685	1e-06	-317.344		r456
04_62	790	0.5	0.00558568	0.144535	-577.437				r669	1783	1e-06	-319.635		r133
03_03	805	0.00221664	1e-05	0.142307	-478.302				r346	1744	1e-06	-301.847		r163
01_57	791	0.305267	1e-05	0.0827764	-514.672				r671	1919	1e-06	-328.098		r113
02_41	776	0.023806	1e-05	0.0467976	-364.74				r724	1720	1e-06	-330.259		r466
04_11	737	0.0452089	1e-05	0.270002	-509.701				r70	1377	1e-06	-262.186		r393
04_35	738	0.096108	1e-05	0.194676	-556.59				r456	1679	1e-06	-331.023		r911
01_26	733	0.0441948	1e-05	0.0818925	-411.097				r133	1538	1e-06	-293.955		r117
02_01	738	0.0400135	1e-05	0.0416188	-371.05				r163	1291	1e-06	-276.053		r798
04_31	714	0.229522	0.00750005	0.200658	-595.088				r113	1596	1e-06	-291.625		r742
02_58	696	0.0189913	1e-05	0.0297486	-316.898				r466	1816	1e-06	-337.528		r791
03_79	637	0.0590133	1e-05	0.39428	-479.107				r911	1739	1e-06	-346.026		r202
03_82	543	0.134444	1e-05	0.282883	-468.364				r117	1886	1e-06	-332.146		r535
01_14	548	0.483268	1e-05	0.113294	-385.418				r798	1356	1e-06	-249.796		r259
04_65	539	0.0368445	1e-05	0.242777	-403.443				r742	1688	1e-06	-323.474		r838
01_44	534	0.0430505	1e-05	0.101719	-346.699				r791	1717	1e-06	-323.507		r748
04_16	502	0.273604	1e-05	0.31643	-462.051				r202	1520	1e-06	-309.834		r126
01_21	490	0.127287	1e-05	0.104725	-354.269				r259	1814	1e-06	-328.535		r426
									r838	1909	1e-06	-335.023		r314
									r748	1844	1e-06	-333.311		r75
IMF3									r126	1864	1e-06	-325.511		r383
									r426	1782	1e-06	-315.205		r475
7.16.7	1000	0.0135361	1e-05	0.0369392	-441.367		3.10.2		r314	1824	1e-06	-334.146		r577
9.7.1	785	0.159555	0.00960597	0.216003	-649.193		2.9.6		r75	1563	1e-06	-301.01		r416
4.5.1	837	0.0360317	1e-05	0.0785631	-480.51		10.12.6		r383	1702	1e-06	-315.723		r404
4.5.6	845	0.0101393	1e-05	0.0838822	-428.447		11.2.3		r475	1600	1e-06	-301.506		r370
4.5.4	802	0.0141485	0.00281268	0.0874244	-438.073		2.6.6		r577	1571	1e-06	-285.716		r864
1.16.4	868	0.0092257	0.000514181	0.186393	-595.627		2.15.1		r416	1649	1e-06	-289.469		r488
5.11.1	1110	0.0182012	0.000769529	0.0897568	-581.393		1.1.3		r404	1680	1e-06	-309.567		r691
9.14.7	926	0.0228446	1e-05	0.119332	-545.332		2.10.7		r370	1361	1e-06	-295.485		r781
3.15.5	778	0.0109926	1e-05	0.23215	-403.296		2.6.5		r864	1817	1e-06	-333.738		r778
3.15.6	917	0.0170384	1e-05	0.0781466	-501.781		2.10.3		r488	1854	1e-06	-335.388		r326
3.4.2	1180	0.019736	1e-05	0.0180455	-452.744		11.14.1		r691	1724	1e-06	-291.66		r110
7.6.6	1096	0.0111	1e-05	0.0510208	-517.053		2.4.3		r778	1771	1e-06	-321.595		r481
11.12.1	896	0.0194703	1e-05	0.0628038	-471.246		7.9.2		r326	1421	1e-06	-245.734		r689
10.16.1	1058	0.00641105	1e-05	0.112242	-548.48		3.2.1		r110	1772	1e-06	-342.186		r602
8.5.4	1095	0.0137085	0.00387817	0.0566559	-505.119		1.1.6		r481	1603	1e-06	-293.97		r713
8.5.5	959	0.0309966	1e-05	0.0760614	-512.978		2.4.4		r689	1519	1e-06	-271.311		r556
8.5.1	1294	0.00991626	1e-05	0.0145371	-479.266		11.12.3		r602	1438	1e-06	-288.67		r106
10.12.7	976	0.0167403	1e-05	0.0640585	-450.714		1.9.6		r713	1229	1e-06	-238.868		r143
10.7.6	818	0.00419154	1e-05	0.241824	-468.037		3.10.4		r556	1551	1e-06	-297.032		r900
10.7.7	750	0.0108113	0.000871688	0.314371	-487.351		11.15.4		r106	1813	1e-06	-343.138		r226
10.7.4	1001	0.00483107	1e-05	0.155966	-562.939		1.7.3		r143	1541	1e-06	-280.11		r875
5.6.7	776	0.340684	0.0288915	0.0973804	-547.031		2.15.7		r900	1376	1e-06	-245.459		r188
5.6.6	817	0.0642278	1e-05	0.124477	-529.19		6.10.6		r875	1338	1e-06	-254.908		r907
3.7.1	1078	0.0433277	1e-05	0.0224773	-520.488		11.2.7		r188	1562	1e-06	-290.333		r152
8.9.7	925	0.0127389	1e-05	0.146365	-561.811		6.9.7		r907	1710	1e-06	-309.83		r715
10.3.1	1027	0.0140525	0.00119812	0.193804	-511.49		3.7.3		r152	1649	1e-06	-288.496		r53
6.16.2	934	0.0434398	1e-05	0.0591027	-505.252		1.9.4		r715	1775	1e-06	-308.516		r722
11.4.1	1089	0.0252829	1e-05	0.0637191	-522.631		2.4.7		r53	1810	1e-06	-312.392		r670
8.10.1	1212	0.012183	0.00218374	0.0118888	-433.32		7.2.4		r722	1433	1e-06	-254.115		r111
8.10.5	981	0.00694995	1e-05	0.0743906	-463.371		10.12.5		r670	1760	1e-06	-317.218		r618
5.14.4	856	0.0178157	1e-05	0.13787	-543.787		4.3.4		r111	1817	1e-06	-317.252		r372
5.14.1	962	0.0195005	1e-05	0.0818308	-511.931		11.10.6		r618	1817	1e-06	-321.062		r751
3.9.6	841	0.0314955	0.000143786	0.0427911	-438.324		3.5.1		r372	1194	1e-06	-245.064		r179
6.10.3	938	0.0546717	1e-05	0.14849	-616.653		11.11.3		r179	1695	1e-06	-281.467		r871
12.12.5	1006	0.0123294	0.000501038	0.117749	-549.999		2.15.4		r871	1818	1e-06	-310.486		r637
4.6.1	1068	0.0120493	1e-05	0.0298751	-424.997		11.11.1		r637	1585	1e-06	-289.983		r743
3.12.4	773	0.0181509	1e-05	0.480981	-583.41		1.8.3		r743	1839	1e-06	-306.766		r803
9.6.6	1039	0.0395401	1e-05	0.0304165	-472.317		3.4.3		r803	1814	1e-06	-320.762		r387
9.6.4	959	0.0202142	1e-05	0.0851813	-487.616		8.2.4		r387	1678	1e-06	-317.691		r692
7.9.6	944	0.0253557	1e-05	0.0438204	-437.018		2.6.3		r692	1753	1e-06	-327.702		r323
7.9.4	1190	0.0174311	1e-05	0.0171956	-443.757		9.3.5		r323	1761	1e-06	-317.784		r299
9.8.4	1001	0.0151908	1e-05	0.160127	-596.529		11.12.4		r299	1538	1e-06	-285.548		r412
9.8.7	1036	0.0171109	1e-05	0.127826	-566.517		7.16.2		r412	1819	1e-06	-313.184		r548
7.11.1	838	0.00931399	1e-05	0.112584	-447.333		4.14.2		r548	1387	1e-06	-291.443		r897
11.15.6	1147	1e-05	1e-05	0.0230251	-426.914		7.8.3		r897	1729	1e-06	-317.47		r219
4.8.1	1102	0.0197532	0.000367075	0.0143118	-431.217		11.11.4		r219	1777	1e-06	-337.474		r324
1.11.1	1093	0.00181961	1e-05	0.0801188	-516.626		8.10.6		r324	1729	1e-06	-318.788		r47
9.4.2	798	0.0438381	1e-05	0.123315	-484.439		7.7.4		r47	1824	1e-06	-331.763		r52
9.2.1	1016	0.0269474	0.00046532	0.0512571	-501.219		8.6.2		r52	1744	1e-06	-295.359		r161
1.15.7	847	0.0228688	1e-05	0.205969	-591.606		7.9.7		r161	1569	1e-06	-305.243		r366
8.8.4	1144	0.0136738	1e-05	0.0385231	-486.204		2.10.6		r366	1711	1e-06	-306.864		r391
8.2.7	778	0.00384033	1e-05	0.292689	-584.776		7.14.3		r391	1692	1e-06	-315.652		r392
8.6.6	917	0.0338927	1e-05	0.29663	-650.39		2.6.7		r392	1436	1e-06	-278.506		r584
8.6.5	826	0.016632	0.00393075	0.34157	-567.787		3.8.1		r584	1728	1e-06	-319.744		r888
9.13.2	846	0.00469225	1e-05	0.171928	-510.897		7.6.5		r888	1712	1e-06	-302.472		r114
9.13.5	870	0.00795143	1e-05	0.180168	-456.519		3.8.7		r114	1441	1e-06	-276.427		r271
5.7.2	990	0.0175673	0.00149639	0.157949	-551.884		7.9.3		r271	1765	1e-06	-304.91		r390
5.8.1	1019	0.00851017	1e-05	0.0822771	-476.745		5.5.3		r390	1656	1e-06	-294.878		r490
12.6.1	908	0.0238238	0.00227282	0.0629942	-467.144		1.1.2		r490	1775	1e-06	-329.438		r502
5.8.7	806	0.0105243	1e-05	0.152395	-456.216		3.10.6		r502	1765	1e-06	-326.825		r825
10.13.5	915	0.00287814	1e-05	0.169225	-546.7		3.6.6		r825	1833	1e-06	-344.093		r894
10.13.1	1126	0.0229721	1e-05	0.0741756	-575.209		1.8.1		r894	1711	1e-06	-315.949		r378
7.8.5	974	0.00815048	1e-05	0.103547	-516.57		11.8.6		r378	1653	1e-06	-296.638		r660
7.12.4	831	0.0235358	1e-05	0.139296	-491.327		1.8.2		r660	1304	1e-06	-265.967		r97
4.16.1	988	0.0639769	1e-05	0.0868197	-610.084		1.6.1		r640	1885	1e-06	-319.475		r640
7.12.2	889	0.0150701	1e-05	0.102235	-483.307		7.16.4		r452	1519	1e-06	-289.564		r452
10.6.7	1068	0.0128065	0.00293632	0.065108	-512.711		3.8.4		r749	1793	1e-06	-330.76		r749
10.6.6	1104	0.010676	1e-05	0.0825106	-578.339		8.11.6		r470	1806	1e-06	-294.246		r470
10.6.4	1074	0.00646014	1e-05	0.0847121	-521.832		1.14.5		r696	1627	1e-06	-308.065		r696
3.6.2	1062	0.0156606	0.00346807	0.277784	-668.624		9.15.6		r558	1817	1e-06	-325.105		r558
4.12.6	759	0.0340514	0.00605299	0.0947963	-460.6		2.9.7		r811	1782	1e-06	-305.793		r811
2.15.5	835	0.00945381	1e-05	0.220749	-542.805		8.16.6		r661	1470	1e-06	-290.781		r661
10.2.6	944	0.00760797	1e-05	0.179404	-552.63		2.9.4		r424	1592	1e-06	-309.272		r424
1.9.1	959	0.0156625	1e-05	0.0814408	-497.788		9.4.6		r699	1490	1e-06	-288.782		r699
1.9.5	915	0.0306621	1e-05	0.0996903	-504.696		9.4.3		r189	1235	1e-06	-264.467		r189
12.16.1	761	0.0219721	1e-05	0.159597	-463.58		1.14.1		r762	1415	1e-06	-273.671		r762
12.16.4	1094	0.0133239	1e-05	0.0551952	-516.804		8.8.3		r422	1402	1e-06	-270.111		r422
6.15.1	792	0.0168483	1e-05	0.0609126	-406.096		11.15.6		r308	1749	1e-06	-324.697		r308
6.3.1	943	0.0143853	0.00578958	0.098788	-533.872		2.6.2		r816	1762	1e-06	-333.336		r816
8.9.2	1067	0.0215623	1e-05	0.0530645	-485.844		3.4.4		r129	1340	1e-06	-248.889		r129
5.15.1	984	0.0187317	1e-05	0.108918	-550.681		3.10.1		r288	1638	1e-06	-284.106		r288
1.7.6	836	0.0224749	1e-05	0.158578	-516.326		8.6.1		r409	1715	1e-06	-306.277		r409
10.8.1	1136	0.0080738	1e-05	0.0755355	-489.584		1.2.3		r376	1566	1e-06	-280.786		r376
7.14.1	1173	0.0147521	1e-05	0.0938323	-608.612		8.5.1		r542	1261	1e-06	-253.151		r542
8.9.1	1292	0.0188178	1e-05	0.00785836	-482.88		3.5.4		r244	1733	1e-06	-328.938		r244
8.8.6	1294	0.0575896	0.00207369	0.00332267	-507.044		7.12.5		r676	1542	1e-06	-271.978		r676
8.8.3	1263	0.0189514	1e-05	0.00407367	-492.635		7.8.4		r217	1296	1e-06	-271.155		r217
8.8.1	1332	0.0370859	1e-05	0.00917618	-530.342		4.14.3		r794	1541	1e-06	-283.395		r794
8.7.1	1209	0.0170012	1e-05	0.0222558	-505.543		11.14.4		r220	1594	1e-06	-290.444		r220
8.6.4	1149	0.0158447	0.000574466	0.0527571	-535.864		7.7.7		r443	1621	1e-06	-286.326		r443
8.6.2	1405	0.0155001	1e-05	0.00251572	-388.18		3.9.4		r756	1699	1e-06	-339.154		r756
8.6.1	1247	0.0133969	1e-05	0.0106876	-445.674		1.8.5		r598	1564	1e-06	-283.302		r598
8.4.6	557	0.0210441	1e-05	0.118938	-355.279		8.10.1		r727	1654	1e-06	-295.222		r727
8.4.4	534	0.0279961	1e-05	0.0721983	-311.965		8.9.1		r272	1662	1e-06	-297.367		r272
8.2.6	1275	0.0168765	1e-05	0.0155985	-508.054		1.8.6		r792	1754	1e-06	-290.101		r792
8.2.4	1303	0.0152998	1e-05	1e-05	-497.502		1.7.4		r667	1802	1e-06	-304.715		r667
8.2.3	1215	0.0189044	0.00276705	0.0115172	-487.152		11.7.7		r910	1756	1e-06	-303.172		r910
8.16.6	1323	0.0218765	1e-05	1e-05	-478.631		1.8.4		r679	1244	1e-06	-284.65		r679
8.11.7	1127	0.0329774	1e-05	0.0589877	-540.582		1.7.2		r920	1541	1e-06	-304.106		r920
8.11.6	1323	0.0169213	1e-05	0.00414851	-474.74		4.3.1		r685	1327	1e-06	-250.727		r685
8.11.3	1233	0.0184639	1e-05	0.0206178	-472.873		2.10.4		r690	1686	1e-06	-302.249		r690
8.10.6	1359	0.0123162	1e-05	0.00506042	-469.23		6.10.5		r479	1174	1e-06	-251.726		r479
8.10.3	1096	0.0333034	1e-05	0.00193309	-499.476		3.7.4		r315	1507	1e-06	-271.458		r315
7.9.7	1381	0.0180143	1e-05	1e-05	-440.662		9.4.4		r865	1791	1e-06	-295.32		r865
7.9.3	1292	0.014912	1e-05	0.00376504	-553.529		2.9.1		r615	1723	1e-06	-308.682		r615
7.9.2	1479	0.00900248	1e-05	0.000681956	-442.635		3.7.6		r194	1268	1e-06	-235.001		r194
7.8.4	1379	0.0211235	0.001289	0.00242132	-496.068		11.16.2		r120	1672	1e-06	-304.774		r120
7.8.3	1295	0.0120935	1e-05	0.00466472	-459.347		6.10.7		r834	1797	1e-06	-314.719		r834
7.7.7	1304	0.0200064	1e-05	0.00559681	-512.975		11.12.7		r788	1127	1e-06	-253.789		r788
7.7.4	1426	0.0103514	1e-05	0.00711174	-541.265		8.2.6		r866	1726	1e-06	-288.497		r866
7.7.3	0	0.01	0.01	0.01	0		3.9.7		r889	1620	1e-06	-280.824		r889
7.6.5	1338	0.0154364	1e-05	0.00299088	-471.318		1.2.7		r711	1742	1e-06	-311.558		r711
7.2.4	1298	0.0135854	1e-05	1e-05	-502.466		8.2.3		r484	1818	1e-06	-312.773		r484
7.16.4	1303	0.0208506	1e-05	1e-05	-490.28		10.12.4		r228	1674	1e-06	-289.541		r228
7.16.2	1315	0.0163768	1e-05	1e-05	-497.336		12.15.3		r180	1206	1e-06	-244.302		r180
7.14.7	357	0.0571815	0.00914747	0.0639983	-242.375		2.6.1		r783	1576	1e-06	-289.229		r783
7.14.3	1321	0.0183359	1e-05	1e-05	-466.325		4.8.1		r658	1385	1e-06	-295.94		r658
7.12.5	1350	0.00953467	0.000849031	0.0143246	-500.512		7.9.4		r759	1649	1e-06	-292.141		r759
6.9.7	1324	0.0105194	1e-05	0.00256169	-430.886		8.10.3		r686	1697	1e-06	-293.723		r686
6.9.6	392	0.0358917	0.0123557	0.275342	-275.732		6.9.1		r600	1659	1e-06	-311.869		r600
6.9.2	1119	0.0247212	1e-05	0.0469261	-510.027		2.9.3		r694	1781	1e-06	-316.817		r694
6.9.1	1359	0.0135429	1e-05	0.0232559	-517.343		3.4.1		r617	1715	1e-06	-311.49		r617
6.4.3	1059	0.0234359	0.000256241	0.0399391	-475.055		3.4.2		r818	1660	1e-06	-299.918		r818
6.3.7	1167	0.0233879	1e-05	0.0159907	-475.032		1.1.1		r695	1692	1e-06	-306.592		r695
6.3.6	1274	0.0076638	1e-05	0.0396407	-516.883		2.10.2		r921	1741	1e-06	-307.77		r921
6.3.5	1135	0.00720334	0.000523192	0.0588519	-480.394		8.11.3		r293	1227	1e-06	-261.935		r293
6.3.2	1060	0.0247812	0.00477293	0.0168418	-457.69		8.7.1
6.10.7	1179	0.00973174	1e-05	0.0218925	-450.291		6.3.7
6.10.6	1369	0.0123587	1e-05	1e-05	-445.929		2.4.6
6.10.5	1276	0.0114622	1e-05	0.0172305	-507.801		1.6.6
5.5.7	274	0.0802632	1e-05	0.0944192	-208.822		4.6.1
5.5.3	1296	0.0192216	1e-05	1e-05	-485.507		3.10.3
4.3.4	1240	0.0137778	1e-05	1e-05	-521.38		8.8.1
4.3.3	1162	0.0243655	1e-05	0.0283759	-514.991		6.3.2
4.3.1	1310	0.0275961	1e-05	5.46425e-05	-553.176		6.3.6
4.14.3	1412	0.0223329	1e-05	0.00270217	-405.754		1.14.4
4.14.2	1362	0.015458	1e-05	0.00104796	-425.099		9.4.1
3.9.7	1237	0.0162701	1e-05	0.0164983	-524.691		3.15.1
3.9.4	1422	0.0165852	0.00126959	0.0078247	-507.103		3.4.6
3.9.1	1164	0.0381951	1e-05	0.0492919	-562.89		7.16.7
3.8.7	1328	0.0169444	1e-05	0.00150569	-431.731		8.8.4
3.8.4	1232	0.0113941	1e-05	0.00966521	-418.445		4.3.3
3.8.1	1406	0.0183952	1e-05	1e-05	-485.375		3.2.6
3.7.6	1384	0.0251073	1e-05	0.00588413	-503.894		9.15.4
3.7.4	1273	0.00829759	1e-05	0.0208445	-474.521		7.6.6
3.7.3	1322	0.009557	1e-05	0.00362236	-498.964		8.8.6
3.6.6	1433	0.0198379	1e-05	1e-05	-460.842		6.4.3
3.6.3	896	0.0253905	1e-05	0.0705208	-469.617		3.7.1
3.5.4	1291	0.0184965	0.0012207	0.00489035	-503.554		6.3.5
3.5.1	1211	0.0076567	1e-05	0.00619154	-438.4		12.16.4
3.4.6	1153	0.0466618	1e-05	0.003372	-431.351		8.6.4
3.4.4	1249	0.00764973	1e-05	0.0157306	-451.922		7.9.6
3.4.3	1333	0.015254	1e-05	1e-05	-440.806		9.6.6
3.4.1	1245	0.017727	1e-05	0.0200446	-484.234		6.9.2
3.2.6	1068	0.016914	0.0018023	0.0344785	-484.014		8.5.4
3.2.1	1472	0.00855744	1e-05	0.00123387	-455.41		3.9.6
3.15.1	1214	0.0283184	1e-05	0.0213288	-497.688		8.9.2
3.10.6	1252	0.010833	1e-05	0.00859141	-467.582		6.15.1
3.10.4	1406	0.0107695	1e-05	1e-05	-418.003		1.6.3
3.10.3	1179	0.0158456	0.00375142	0.0229304	-472.787		9.2.1
3.10.2	1351	1e-05	1e-05	1e-05	-402.394		10.12.7
3.10.1	1354	0.0219849	1e-05	0.00149109	-485.733		10.6.7
2.9.7	1280	0.0206329	1e-05	0.00108703	-399.239		8.10.5
2.9.6	1375	1e-05	1e-05	0.00151379	-406.137		1.11.1
2.9.4	1348	0.0136632	1e-05	0.00834316	-492.628		11.12.1
2.9.3	1301	0.028263	1e-05	0.00863994	-473.369		10.8.1
2.9.1	1213	0.0140054	1e-05	0.016072	-484.04		3.9.1
2.6.7	1349	0.0175185	0.000870323	1e-05	-528.285		11.4.1
2.6.6	1347	0.00412007	1e-05	1e-05	-413.045		12.6.1
2.6.5	1350	0.00621701	1e-05	1e-05	-451.328		5.8.1
2.6.3	1390	0.0136527	1e-05	0.00237792	-456.741		10.6.4
2.6.2	1254	0.0128997	1e-05	0.0102544	-453.501		8.11.7
2.6.1	1369	0.0287611	0.00103763	0.00435405	-487.087		10.6.6
2.4.7	1313	0.0117154	0.00167615	1e-05	-444.765		4.5.6
2.4.6	1261	0.0294193	0.00160361	0.01028	-513.057		3.15.6
2.4.4	1354	0.00753624	1e-05	0.00283138	-454.736		3.6.3
2.4.3	1366	0.00596389	1e-05	0.00121438	-415.829		1.9.1
2.15.7	1433	1e-05	0.000882527	0.0114452	-507.642		10.13.1
2.15.6	6	1e-05	0.01	0.99999	-4.15894		5.14.1
2.15.4	1376	0.0129704	0.00140165	1e-05	-441.042		6.16.2
2.15.1	1485	0.0042244	1e-05	0.000347203	-496.82		4.5.4
2.10.7	1333	0.00516755	1e-05	0.000997477	-397.277
2.10.6	1253	0.0115032	1e-05	0.00657209	-456.436
2.10.4	1071	1e-05	1e-05	0.0281498	-427.508
2.10.3	1384	0.00547815	1e-05	0.000837046	-433.307
2.10.2	1184	0.0142409	1e-05	0.0243509	-486.429
1.9.6	1428	0.00981153	1e-05	0.000885771	-453.814
1.9.4	1390	0.0132088	1e-05	1e-05	-439.82
1.8.6	1252	0.0269997	1e-05	1e-05	-441.593
1.8.5	1206	0.022955	1e-05	0.0030867	-441.928
1.8.4	1156	0.0189615	0.000512874	0.00794452	-459.469
1.8.3	1335	0.0128707	1e-05	0.0016326	-472.548
1.8.2	1344	0.0160516	1e-05	0.0045519	-467.983
1.8.1	1318	0.0172279	0.000438266	0.00219707	-504.359
1.7.4	1306	0.0113238	1e-05	0.0157648	-505.826
1.7.3	1368	0.0123049	1e-05	1e-05	-493.12
1.7.2	1179	0.0161527	1e-05	0.0114632	-457.611
1.6.7	643	0.0202375	1e-05	0.0399276	-334.406
1.6.6	1181	0.0298427	1e-05	0.0120199	-492.488
1.6.3	972	0.0568863	1e-05	0.02164	-501.643
1.6.2	237	1e-05	1e-05	0.138256	-184.756
1.6.1	1400	0.0128859	1e-05	0.00784	-448.786
1.2.7	1203	0.0121139	1e-05	0.0206716	-469.296
1.2.3	1257	0.0174944	1e-05	0.00672515	-447.71
12.15.3	1237	0.0186638	1e-05	0.0154502	-531.358
12.15.1	712	0.0328931	1e-05	0.0462382	-372.025
11.8.6	1315	0.0163903	1e-05	0.00413876	-494.499
11.7.7	1271	0.0184712	1e-05	0.00863886	-530.338
1.1.6	1365	0.0102789	1e-05	1e-05	-415.852
1.14.5	1269	0.00283196	0.00213426	0.0162664	-453.239
1.14.4	1035	0.0327483	1e-05	0.0149341	-452.064
1.14.1	1426	0.0225816	1e-05	1e-05	-490.014
1.1.3	1377	0.00542966	1e-05	0.000558581	-407.713
1.1.2	1300	0.0153107	1e-05	0.00398851	-475.82
11.2.7	1415	0.0128932	1e-05	1e-05	-484.133
11.2.3	1408	0.0034268	1e-05	1e-05	-394.059
1.1.1	1296	0.0267405	1e-05	0.0114671	-462.636
11.16.2	1308	0.0296225	0.00157003	1e-05	-468.835
11.15.4	1442	0.0110739	1e-05	1e-05	-431.663
11.14.4	1432	0.0223726	1e-05	0.00294001	-432.667
11.14.1	1423	0.00708682	1e-05	1e-05	-455.394
11.12.7	1045	0.0110095	1e-05	0.0210988	-429.548
11.12.4	1290	0.011026	1e-05	0.00521242	-434.578
11.12.3	1393	0.0106081	1e-05	1e-05	-435.035
11.11.4	1389	0.0169578	1e-05	1e-05	-487.532
11.11.3	1416	0.013239	1e-05	0.000866632	-459.052
11.11.1	1367	0.0143811	1e-05	1e-05	-463.775
11.10.6	1315	0.0138186	1e-05	1e-05	-484.213
10.12.6	1405	0.00304037	1e-05	1e-05	-423.802
10.12.5	1415	0.0115037	1e-05	0.00218918	-509.25
10.12.4	1274	0.0246911	1e-05	0.0089896	-484.437
9.4.4	1027	0.0132594	1e-05	0.0161849	-405.458
9.4.3	1328	0.0225232	1e-05	1e-05	-445.47
9.4.1	932	0.0266229	1e-05	0.022014	-408.841
9.3.5	1394	0.0161337	1e-05	1e-05	-416.794
9.15.6	1467	0.0173015	1e-05	0.00393363	-443.454
9.15.4	884	0.0295823	1e-05	0.0241286	-422.941
9.4.6	1307	0.0180479	1e-05	0.00406233	-462.87
SWC
imswc889	1367	0.0380546	1e-05	0.00480185	-549.9		imswc649
isg412	1287	0.0465849	1e-05	0.00357378	-530.628		isg236
imswc236	1425	0.0372917	0.00127274	0.00417065	-514.705		imswc472
imswc496	1402	0.0494432	1e-05	1e-05	-554.406		isg233
isg397	1288	0.0321385	1e-05	1e-05	-529.804		imswc740
imswc476	1267	0.0452197	0.00394844	0.013585	-573.957		imswc905
imswc248	1387	0.0405516	1e-05	0.00076209	-566.636		imswc018
imswc882	1446	0.0389955	1e-05	1e-05	-542.071		imswc258
isg198	1059	0.046011	1e-05	0.0301176	-498.126		isg152
imswc950	1369	0.0491716	5.57645e-05	0.00406476	-508.619		isg226
isg194	1267	0.037414	1e-05	0.0122485	-521.576		imswc712
imswc713	1482	0.0698594	0.00163236	1e-05	-572.688		isg160
imswc665	1461	0.0441809	1e-05	1e-05	-536.745		isg328
imswc745	1279	0.0307482	1e-05	0.0176095	-504.678		isg042
imswc521	1323	0.0425038	1e-05	0.00346839	-526.95		imswc841
imswc553	1425	0.0253367	1e-05	0.00708437	-543.81		imswc520
imswc277	1212	0.0649156	0.00169756	0.0100278	-554.324		imswc435
imswc084	1383	0.0402356	0.00140984	0.00455829	-565.558		imswc638
isg176	1455	0.0274442	1e-05	0.00171548	-467.813		imswc761
isg218	1341	0.0819899	0.00168079	0.00088775	-560.827		imswc328
isg018	1314	0.0378585	1e-05	0.00510122	-511.881		isg368
imswc708	1362	0.0517138	0.00152504	0.0123963	-588.474		imswc569
isg339	1319	0.0925281	1e-05	0.0140499	-599.342		imswc376
imswc734	1435	0.0351774	0.00148908	0.0087386	-535.122		isg272
isg394	1366	0.0775404	1e-05	0.00441942	-577.394		imswc891
imswc281	1359	0.0368173	0.00132121	0.00455235	-557.505		isg387
imswc332	1297	0.0469101	1e-05	0.00748788	-518.545		imswc924
isg073	1306	0.046728	1e-05	0.00753695	-514.753		isg104
isg217	1475	0.0284025	1e-05	0.000918093	-465.776		imswc284
isg051	1243	0.0344843	1e-05	0.012132	-461.404		imswc526
isg210	1302	0.0440007	1e-05	0.00359037	-525.024		isg398
isg413	1427	0.0414117	1e-05	0.00308389	-551.216		isg041
imswc253	1281	0.0582847	0.00174224	0.00745324	-546.251		isg185
isg313	1331	0.039955	1e-05	0.0111174	-545.283		imswc306
imswc625	1523	0.0218634	1e-05	0.00148858	-454.92		isg332
imswc329	1452	0.0396995	1e-05	0.00255513	-489.526		isg220
imswc020	1329	0.0734718	0.00156891	1e-05	-566.776		isg456
imswc237	1064	0.0457762	1e-05	0.0291767	-509.423		imswc625
imswc900	1452	0.034683	0.00156812	1e-05	-500.073		imswc848
imswc302	1378	0.0565594	1e-05	1e-05	-507.261		imswc590
isg227	1170	0.0624042	1e-05	0.0073909	-459.332		isg404
imswc428	1233	0.0443996	0.000669717	0.0185004	-583.749		isg094
imswc684	1194	0.0364948	1e-05	0.0128522	-555.664		imswc934
imswc800	1423	0.0519084	1e-05	0.00160075	-572.183		imswc612
isg401	1325	0.0517418	1e-05	0.0089461	-536.97		imswc752
isg421	1345	0.0379528	1e-05	0.00377352	-505.754		imswc505
imswc899	1186	0.0477288	1e-05	0.0115963	-475.366		imswc896
imswc575	1060	0.0519264	1e-05	0.0182754	-488.714		imswc374
imswc365	1176	0.0420525	0.0016192	0.015083	-519.52		isg476
imswc582	1222	0.0430566	0.00135289	0.0167534	-545.54		isg472
isg391	980	0.0192918	1e-05	0.739333	-465.603		imswc642
imswc830	1377	0.0509704	0.00138415	1e-05	-549.761		imswc884
imswc697	1495	0.0296916	1e-05	1e-05	-484.219		isg352
imswc200	1232	0.0329765	1e-05	0.0178692	-495.207		isg386
isg411	1314	0.0189215	1e-05	0.0183238	-527.826		imswc636
imswc265	1420	0.0390315	1e-05	1e-05	-554.933		isg080
isg212	1265	0.0510022	1e-05	0.00575648	-531.252		isg457
isg419	1264	0.0467184	1e-05	0.0105711	-520.078		imswc747
isg140	1069	0.0623176	1e-05	0.0164048	-512.273		imswc267
imswc564	1383	0.0555207	0.00156499	0.00264695	-527.716		imswc736
isg253	1157	0.0509805	0.00165881	0.00697988	-507.337		imswc320
isg361	1383	0.0340296	1e-05	0.00292848	-513.716		isg032
imswc784	1432	0.046623	0.00152276	0.00591764	-587.128		imswc368
isg390	1120	0.040262	1e-05	0.00195813	-435.426		isg195
imswc555	1247	0.0532345	0.00180558	0.0027246	-506.578		isg145
isg099	1167	0.0234377	1e-05	0.0160165	-438.173		isg269
imswc766	1118	0.0390291	0.00187728	0.0133523	-461.475		imswc152
imswc252	1337	0.0501172	1e-05	0.0023067	-527.614		imswc664
isg219	1322	0.0360249	0.00180669	0.00512606	-486.756		imswc765
imswc360	880	0.044657	0.00218532	0.0348021	-430.168		imswc160
isg410	1000	0.053157	1e-05	0.0147663	-485.15		imswc014
isg333	1084	0.0439452	1e-05	0.0189079	-498.392		isg406
isg399	1066	0.038391	1e-05	0.0108063	-448.841		isg364
isg003	1262	0.0403125	1e-05	0.00554213	-486.051		isg473
isg235	1013	0.0413844	1e-05	0.0228269	-431.136		imswc093
imswc424	1220	0.0710924	1e-05	0.0080394	-559.158		isg311
imswc832	1462	0.0429744	1e-05	0.00396487	-539.882		imswc448
isg470	1112	0.0327986	1e-05	0.0100532	-475.572		imswc616
imswc082	1141	0.0503887	1e-05	0.0154084	-484.024		imswc873
imswc548	1217	0.0350652	1e-05	0.0113842	-487.806		isg176
imswc953	1454	0.0378945	1e-05	1e-05	-484.699		imswc544
imswc804	1366	0.0577804	1e-05	1e-05	-504.857		imswc272
imswc310	941	0.0863122	1e-05	0.0159971	-443.365		isg217
imswc660	1404	0.0306885	1e-05	0.00736002	-509.642		imswc534
imswc273	803	0.0372519	1e-05	0.0163398	-399.871		imswc878
imswc651	1201	0.066189	0.00138695	0.00395419	-495.89		isg192
imswc669	1257	0.0484442	1e-05	0.00994477	-483.002		isg075
imswc304	1330	0.0675	1e-05	0.00577851	-458.694		imswc617
imswc878	1482	0.029506	1e-05	1e-05	-460.927		imswc697
isg290	1259	0.0481553	1e-05	0.00942423	-482.008		imswc280
imswc095	1200	0.0561085	0.00224082	0.0023402	-431.648		imswc260
imswc937	1528	0.0383919	1e-05	1e-05	-418.503		imswc902
imswc014	1485	0.0281273	1e-05	1e-05	-488.649		imswc510
imswc906	958	0.0594736	1e-05	0.0567414	-480.39		imswc494
imswc243	1467	0.0333651	1e-05	1e-05	-462.42		isg377
imswc195	981	0.0500648	1e-05	0.040708	-487.723		imswc601
isg160	1460	0.0162029	0.0018313	1e-05	-467.816		isg137
imswc094	1275	0.0778818	1e-05	0.00841515	-461.806		imswc888
isg278	1195	0.0448219	1e-05	0.024068	-526.644		isg431
imswc922	1120	0.0477788	1e-05	0.00769245	-496.097		isg117
isg256	1285	0.0473481	1e-05	1e-05	-469.95		isg402
imswc905	1433	0.00925776	1e-05	0.00347053	-497.116		isg066
isg190	1304	0.0457358	1e-05	0.00601925	-502.072		isg064
imswc712	1550	0.0172328	1e-05	1e-05	-397.629		isg397
imswc392	1260	0.0838252	1e-05	0.0026982	-527.788		imswc054
imswc738	1447	0.0353585	1e-05	0.0020184	-512.47		isg409
imswc313	1417	0.0637682	1e-05	0.0011307	-524.766		imswc206
imswc946	927	0.0564164	1e-05	0.0128207	-434.764		imswc553
imswc280	1486	0.0283518	0.00135629	1e-05	-508.512		isg048
isg158	1456	0.0344761	1e-05	0.00109337	-508.738		isg046
imswc500	1200	0.0339366	1e-05	0.0137316	-466.169		isg389
isg430	1381	0.0356495	1e-05	0.0137366	-495.915		imswc662
imswc887	1122	0.0484467	1e-05	0.0133238	-467.773		imswc688
imswc560	1435	0.0490424	0.00142038	0.0075812	-588.69		imswc594
imswc630	1434	0.0382482	1e-05	0.010475	-524.932		imswc286
imswc857	1221	0.0641615	1e-05	0.00890155	-542.992		imswc296
imswc381	1114	0.0914387	1e-05	0.0089017	-477.388		isg171
imswc180	1273	0.0548234	0.00135336	0.00994635	-594.529		isg025
imswc493	1107	0.0324539	1e-05	0.0254615	-501.554		isg058
imswc776	1322	0.0481261	1e-05	0.00962229	-495.354		imswc243
imswc162	1225	0.0993419	1e-05	0.00945779	-515.5		imswc760
isg016	1177	0.0475717	0.00367609	0.00610438	-503.472		isg181
imswc888	1243	0.023973	0.0013389	0.00600812	-487.37		imswc930
imswc898	1260	0.0401074	1e-05	0.0169303	-480.268		imswc062
isg344	1398	0.0358741	0.00178615	0.00408347	-485.751		isg393
imswc566	1361	0.0520221	1e-05	0.00806369	-504.907		isg382
imswc720	802	0.0714754	1e-05	0.0334819	-448.827		isg468
imswc339	1254	0.0535026	1e-05	0.00986757	-579.177		isg249
isg137	1165	0.022118	1e-05	0.00913403	-434.221		isg132
isg365	877	0.0444278	1e-05	0.0237063	-383.741		imswc298
imswc013	1253	0.0268749	0.00152035	0.0166071	-488.696		imswc224
imswc062	1476	0.0336551	1e-05	1e-05	-473.353		imswc256
imswc286	1257	0.0190908	1e-05	0.0139938	-495.655		imswc312
isg285	1205	0.0391869	1e-05	0.0138172	-447.254		imswc608
imswc902	1502	0.0281364	0.00192808	0.000239	-463.602		isg400
isg066	1361	0.0190363	1e-05	0.0126894	-494.475		isg250
imswc928	1495	0.0343276	0.00175411	0.00622833	-489.679		isg060
imswc874	1298	0.0579336	1e-05	1e-05	-525.145		imswc646
imswc268	1383	0.047972	1e-05	1e-05	-523.496		isg478
isg243	1141	0.0363268	1e-05	0.000679603	-445.279		imswc315
imswc795	1295	0.0429759	1e-05	0.0146367	-501.044		imswc808
isg350	1433	0.0569353	0.00232128	0.00700383	-485.453		isg320
imswc608	1466	0.0271936	0.000979733	0.00634049	-608.44		imswc750
imswc760	1520	0.0297165	1e-05	0.00370069	-515.782		isg359
imswc910	1435	0.0343609	1e-05	0.00605768	-491.791		isg407
imswc895	1146	0.071889	1e-05	0.0190409	-527.088		imswc690
imswc387	1104	0.0475941	0.00149323	0.0143159	-518.663		isg169
isg448	1443	0.0500843	1e-05	0.00179042	-505.317		isg158
imswc557	992	0.0340604	1e-05	0.019661	-420.442		isg463
imswc267	1328	0.024102	1e-05	0.00236306	-473.63		isg149
isg104	1257	0.00545219	1e-05	0.0157759	-428.66		isg238
imswc361	1395	0.0718072	0.00200692	1e-05	-526.643		isg216
isg387	1450	0.0203298	1e-05	0.000673343	-472.617		imswc900
imswc603	1327	0.0366924	1e-05	0.0112348	-496.806		imswc640
imswc935	1061	0.0573111	1e-05	0.000101033	-463.508		isg392
imswc843	1087	0.0686336	1e-05	0.0113924	-476.022		imswc911
isg377	1391	0.0307404	1e-05	1e-05	-502.303		imswc464
isg146	1237	0.0402351	0.00183784	1e-05	-460.264		isg361
imswc269	1329	0.0271023	1e-05	0.0104076	-480.343		isg153
isg357	1041	0.0473319	1e-05	0.0187619	-478.368		isg243
imswc080	1377	0.0717723	0.00173494	0.00297855	-502.906		isg166
imswc092	1102	0.0570843	0.00190141	0.0153967	-487.727		imswc025
isg109	950	0.0569106	1e-05	0.0257359	-414.062		isg411
imswc782	1442	0.0382747	1e-05	0.0020276	-511.502		imswc324
imswc601	1525	0.0285811	1e-05	0.00260563	-472.081		isg204
isg062	1327	0.0596245	1e-05	0.00167582	-480.83		imswc738
imswc806	1181	0.0362761	1e-05	0.0183671	-527.532		imswc269
imswc276	1457	0.0380436	1e-05	0.00497578	-512.514		imswc184
imswc947	1195	0.0331931	1e-05	0.0150787	-461.101		isg415
isg320	1472	0.0329621	0.00196416	1e-05	-486.894		imswc266
isg428	1465	0.0476785	1e-05	1e-05	-558.908		isg452
isg088	1308	0.0683856	1e-05	0.00480378	-503.735		imswc953
isg319	1221	0.0568374	1e-05	0.00916056	-463.617		imswc228
imswc527	1303	0.0632584	0.000746601	0.0067694	-495.301		isg193
isg232	1430	0.0677746	0.00174511	0.00245772	-537.549		imswc660
isg400	1548	0.0344989	1e-05	1e-05	-438.427		imswc780
imswc473	1322	0.0420772	1e-05	0.00430748	-490.519		imswc809
isg378	803	0.0182225	1e-05	0.0234697	-329.178		imswc459
imswc019	818	0.0611858	1e-05	0.0337501	-425.583		imswc176
imswc637	1179	0.045715	0.00196836	0.0034664	-477.492		imswc952
isg164	1268	0.0360824	1e-05	0.0071355	-475.697		isg423
imswc516	1415	0.0472536	1e-05	0.00849333	-545.615		imswc017
isg195	1442	0.0270219	1e-05	1e-05	-478.929		imswc743
isg214	1010	0.0486948	1e-05	0.0246121	-452.985		imswc937
imswc877	1057	0.0349863	0.00199268	0.0281237	-460.548		isg013
imswc918	910	0.0516468	1e-05	0.0225774	-399.036		isg351
imswc640	1376	0.0304725	0.00317026	0.00283488	-531.671		imswc882
imswc238	1263	0.0423667	0.00188433	0.0116447	-518.625		imswc154
imswc296	1387	0.031495	1e-05	0.00167239	-466.051		imswc265
imswc754	691	0.0374187	1e-05	0.0509134	-359.007		isg297
isg322	834	0.0449955	1e-05	0.0185721	-395.128		imswc512
imswc703	803	0.041888	1e-05	0.0447448	-397.727		imswc217
imswc324	1340	0.0307475	1e-05	0.0064988	-513.745		imswc595
isg188	1422	0.0416376	0.00192074	0.000470568	-490.951		isg099
imswc264	1100	0.0377446	1e-05	0.0137651	-428.325		isg191
imswc266	1176	0.0282712	1e-05	0.00940369	-492.629		isg157
imswc012	1318	0.0465649	1e-05	0.00722984	-475.32		isg441
isg067	750	0.0334948	0.00324335	0.0396213	-359.565		imswc908
imswc352	1387	0.0614382	0.00193104	0.00493772	-558.71		imswc574
isg229	1232	0.033504	1e-05	0.0161671	-500.327		isg265
imswc952	1470	0.0382549	1e-05	1e-05	-445.436		isg464
isg372	1425	0.0482606	1e-05	0.00690352	-486.979		imswc793
isg302	1271	0.0446329	1e-05	0.00569929	-547.088		isg203
isg237	1237	0.0485222	1e-05	0.0142067	-475.623		isg374
imswc768	957	0.072819	1e-05	0.0148014	-464.358		imswc777
isg380	1397	0.0492356	1e-05	0.00204692	-462.643		isg330
imswc941	1301	0.0743619	1e-05	0.00917013	-487.528		imswc022
imswc939	1386	0.0580342	1e-05	0.00125398	-460.05		imswc254
isg325	897	0.0382303	1e-05	0.0257548	-390.574		imswc153
imswc614	1435	0.0312422	1e-05	0.0119749	-465.048		isg128
imswc176	1358	0.0370251	0.00121657	1e-05	-551.588		imswc782
isg364	1278	0.0285505	1e-05	1e-05	-475.916		imswc945
isg020	1006	0.0286804	1e-05	0.016436	-419.019		imswc910
isg262	692	0.0266021	1e-05	0.0355767	-336.645		isg324
imswc344	1277	0.0810765	1e-05	0.00293165	-542.293		isg213
isg123	911	0.0309034	1e-05	0.015341	-380.9		isg405
imswc699	1251	0.0492511	1e-05	0.0311666	-569.136		isg414
isg326	1121	0.0432503	1e-05	0.0172042	-467.116		imswc694
isg306	1250	0.0378813	1e-05	0.00922287	-461.293		isg030
imswc958	1212	0.0691215	1e-05	0.00652232	-412.856		imswc003
isg276	1128	0.0526802	1e-05	0.00825852	-488.53		imswc573
isg159	797	0.0336001	1e-05	0.0171115	-359.154		imswc072
imswc210	1207	0.102041	1e-05	0.0131846	-496.491		imswc248
imswc189	1280	0.0419852	0.00145457	0.016671	-563.383		isg179
isg077	983	0.0356702	1e-05	0.020056	-429.5		imswc876
isg336	1081	0.0616762	1e-05	0.01215	-458.972		imswc758
imswc752	1468	0.0210567	1e-05	0.00351714	-496.62		imswc596
imswc003	1507	0.0342832	0.00188208	0.00466522	-494.156		isg378
isg175	1099	0.0478406	1e-05	0.0100389	-472.566		isg421
isg022	886	0.0234526	1e-05	0.043577	-391.752		isg344
imswc284	1471	0.0170508	0.00100658	0.00333581	-566.94		isg045
isg409	1458	0.0305495	1e-05	0.001675	-515.124		imswc739
imswc717	1316	0.0289908	1e-05	0.0187852	-550.371		isg146
imswc206	1316	0.0288043	1e-05	0.00344709	-435.374		isg390
isg373	751	0.032452	1e-05	0.0525742	-381.777		imswc329
imswc636	1236	0.015177	1e-05	0.0105171	-473.585		isg312
isg423	1240	0.0382642	1e-05	1e-05	-495.68		imswc928
imswc540	1274	0.0478465	1e-05	1e-05	-486.469		imswc546
isg296	1439	0.0670133	0.00227715	1e-05	-494.242		isg234
imswc546	1385	0.033466	1e-05	0.00885875	-544.942		imswc470
isg185	1472	0.0209242	1e-05	0.00155259	-484.332		isg338
isg286	1284	0.0662228	1e-05	0.0137181	-530.952		isg010
isg334	812	0.0412061	1e-05	0.0364968	-397.416		imswc883
isg426	814	0.0521798	0.00236395	0.0130342	-392.497		isg275
imswc588	1267	0.0503222	1e-05	0.00684286	-450.978		isg358
isg349	1084	0.0305897	1e-05	0.021676	-458.072		isg270
imswc726	888	0.048044	0.00132477	0.0259972	-443.437		imswc550
isg182	1242	0.0607788	0.00199362	1e-05	-474.224		imswc045
imswc275	811	0.0559009	1e-05	0.0207661	-377.227		imswc281
isg166	1266	0.0318584	1e-05	0.00526147	-514.146		isg108
isg191	1333	0.0273868	1e-05	0.0121145	-501.104		imswc236
imswc621	963	0.0636054	1e-05	0.0171775	-455.18		isg310
isg238	1308	0.0312764	1e-05	0.00482435	-483.408		imswc498
isg435	1378	0.0467218	0.00227411	0.00304471	-444.683		isg125
isg220	1388	0.0199604	1e-05	0.00317157	-454.303		imswc182
isg173	1369	0.065152	1e-05	0.0013588	-451.928		isg470
imswc260	1481	0.0282082	0.0019094	1e-05	-479.364		imswc889
isg464	1423	0.0359814	1e-05	0.0036487	-521.558		isg219
imswc342	1204	0.064116	1e-05	0.00904206	-494.381		isg018
imswc911	1367	0.0366163	1e-05	1e-05	-574.789		imswc276
isg356	990	0.0214126	1e-05	0.0352242	-425.185		isg027
imswc870	1297	0.0450261	1e-05	0.0135051	-518.699		imswc450
isg186	1026	0.0288	1e-05	0.0346866	-462.343		imswc002
imswc711	831	0.068179	1e-05	0.0575851	-463.109		imswc614
imswc875	906	0.0855267	0.00242534	0.0209249	-437.716		isg164
isg392	1461	0.0349335	1e-05	0.00155389	-477.274		isg230
isg264	1058	0.0611773	1e-05	0.0151697	-460.51		isg121
imswc219	1262	0.036035	0.0012084	0.0147065	-531.654		isg189
imswc809	1484	0.036109	1e-05	0.00205965	-503.598		imswc678
imswc748	661	0.0489727	1e-05	0.0534631	-365.587		imswc774
imswc574	1234	0.021514	1e-05	0.0181113	-480.007		isg079
imswc692	1028	0.0503928	1e-05	0.0193639	-432.419		isg112
isg457	1393	0.0260114	1e-05	1e-05	-543.533		isg462
isg376	1383	0.060371	1e-05	1e-05	-516.94		isg084
imswc718	1107	0.0385037	1e-05	0.019445	-466.925		isg103
imswc182	1341	0.0427931	1e-05	5.86212e-05	-525.782		isg199
imswc785	802	0.108561	1e-05	0.0145709	-432.965		isg432
imswc563	753	0.0490125	1e-05	0.0236759	-362.396		isg188
isg478	1158	0.0241911	1e-05	0.0105217	-388.173		imswc925
imswc732	1123	0.0461272	1e-05	0.0157861	-448.077		imswc665
imswc382	980	0.0695564	1e-05	0.0355517	-489.662		isg154
isg445	1054	0.0467163	1e-05	0.01498	-421.231		isg413
isg045	1045	0.0281927	1e-05	0.0136882	-425.827		isg231
imswc457	1425	0.057478	1e-05	0.00134989	-484.686		isg211
imswc544	1363	0.0292068	1e-05	1e-05	-490.673		imswc944
isg367	1043	0.0352927	1e-05	0.0102788	-425.56		imswc600
imswc736	1425	0.0204141	1e-05	0.00609543	-484.683		imswc023
isg359	991	0.0137875	1e-05	0.0212442	-412.331		isg360
imswc057	1063	0.0475215	0.00207507	0.0217512	-465.938		isg102
imswc750	708	0.0274087	1e-05	0.00752511	-323.596		imswc644
imswc315	1378	0.0313591	1e-05	0.00335945	-528.487		isg354
isg161	1190	0.033543	1e-05	0.0247332	-513.081		imswc013
imswc590	1469	0.0221968	1e-05	0.00130206	-442.803		imswc834
isg452	886	0.0273307	1e-05	0.0104812	-373.455		isg020
imswc894	881	0.0520841	1e-05	0.039455	-431.939		isg006
isg108	921	0.0209715	1e-05	0.0217535	-383.42		imswc734
imswc644	1315	0.0375069	0.00126382	0.00619354	-483.739		imswc957
isg094	1023	0.01634	0.00219108	0.00525607	-361.902		imswc363
isg061	1275	0.0355977	1e-05	0.0181328	-544.94		isg367
isg301	1277	0.0488879	0.00136419	0.00514918	-483.709		imswc425
imswc349	942	0.0609959	1e-05	0.0200792	-457.16		isg298
isg168	879	0.078648	1e-05	0.0294007	-472.866		isg003
isg145	896	0.0140841	1e-05	0.0132105	-316.55		isg197
isg405	996	0.0228495	1e-05	0.0177745	-403.434		imswc521
isg222	778	0.0248472	1e-05	0.024042	-360.087		imswc066
isg134	1037	0.0708187	1e-05	0.0127575	-419.373		imswc525
imswc228	970	0.0210736	1e-05	0.0168356	-425.016		imswc084
imswc959	1127	0.0295665	1e-05	0.0186153	-486.089		isg418
isg403	961	0.0421121	1e-05	0.0339265	-474.67		isg123
imswc025	1426	0.0298634	1e-05	0.00728228	-479.867		isg187
imswc409	1233	0.0785264	1e-05	0.00388519	-482.496		imswc956
isg396	1465	0.0472986	0.00148504	0.00223137	-549.832		imswc473
imswc761	1533	0.0179839	0.00170874	1e-05	-459.098		imswc548
isg402	1521	0.029953	1e-05	0.00175526	-489.48		isg429
isg252	1002	0.0350911	1e-05	0.0310493	-426.131		isg051
imswc250	1237	0.0530334	1e-05	0.017289	-475.261		isg143
isg056	1230	0.044477	1e-05	0.0107593	-458.488		imswc297
isg287	1022	0.0343804	0.00240343	0.0160802	-396.329		isg151
isg074	594	0.0529633	1e-05	0.0336512	-290.33		isg156
imswc756	1285	0.0501654	1e-05	0.0155295	-585.367		isg136
isg441	1184	0.0263312	1e-05	0.0132641	-452.924		imswc832
imswc568	780	0.0329356	1e-05	0.0372715	-384.078		isg178
isg172	1298	0.0473271	1e-05	0.00883856	-503.831		imswc065
isg429	1434	0.0426364	1e-05	0.00382567	-479.662		isg081
imswc854	1028	0.065816	1e-05	0.019457	-487.11		imswc492
isg471	813	0.0302551	1e-05	0.0299731	-363.862		isg246
isg119	891	0.0399067	0.00471472	0.0266029	-404.846		isg306
isg384	890	0.0573975	1e-05	0.00608371	-318.264		imswc179
imswc498	1356	0.0354308	0.00245031	0.00490607	-531.741		isg256
imswc446	1321	0.0434492	0.00176644	0.00269393	-500.218		isg284
isg084	1086	0.0332614	0.00201983	0.00847536	-467.138		imswc290
isg038	1058	0.0465287	1e-05	0.00734762	-404.965		isg210
imswc477	962	0.0511479	1e-05	0.023218	-431.851		imswc380
imswc852	907	0.0507552	0.00472031	0.0346659	-448.249		imswc500
imswc233	1265	0.0510464	0.0028896	0.00893911	-436.546		isg087
isg082	926	0.0176071	1e-05	0.0546862	-389.119		isg428
isg462	1189	0.0356106	1e-05	0.0081132	-444.511		imswc717
isg455	969	0.0378907	1e-05	0.0130289	-400.486		imswc540
isg144	850	0.0153224	0.00184212	0.0317582	-363.947		imswc446
imswc285	1399	0.0464898	1e-05	0.00236439	-451.312		imswc603
imswc860	1450	0.0628772	1e-05	0.000370474	-483.579		imswc268
imswc152	1538	0.0250635	0.00156551	0.00106513	-462.76		isg395
isg054	816	0.0425927	1e-05	0.0189581	-384.311		isg291
isg153	1067	0.0264742	1e-05	0.0105101	-420.206		imswc959
imswc184	1527	0.0375219	1e-05	1e-05	-452.083		isg385
imswc503	700	0.0444072	1e-05	0.0489527	-348.694		imswc947
isg211	887	0.0297625	1e-05	0.0149644	-349.401		imswc745
imswc759	873	0.087341	1e-05	0.0277104	-442.911		imswc274
isg065	623	0.0381211	1e-05	0.0109744	-283.507		isg113
isg432	1236	0.0347206	1e-05	0.00910903	-464.489		imswc893
imswc505	1517	0.0245669	1e-05	1e-05	-417.249		imswc622
imswc070	1204	0.0578636	0.00327488	1e-05	-508.734		imswc630
isg345	1242	0.0470343	1e-05	0.00646121	-440.788		imswc386
imswc421	597	0.0235004	1e-05	0.0799766	-327.314		imswc671
imswc160	1429	0.0237895	1e-05	0.00418661	-480.656		isg228
imswc023	1206	0.0339717	1e-05	0.0109443	-436.597		imswc285
isg369	722	0.0805423	0.000569021	0.030046	-354.126		isg222
imswc272	1543	0.0250253	1e-05	0.00420489	-476.053		isg144
isg288	1075	0.0412131	1e-05	0.0126251	-461.996		isg065
imswc065	1300	0.0382543	1e-05	0.00873424	-461.519		isg399
isg460	1184	0.0370215	1e-05	0.0142785	-499.978		imswc589
isg375	770	0.0305794	0.00237056	0.0404815	-374.119		isg017
isg041	1331	0.0192047	1e-05	0.00322766	-462.297		imswc684
imswc696	898	0.0297538	1e-05	0.0356063	-414.192		isg430
imswc701	1202	0.129427	0.00690618	0.0149544	-494.981		imswc058
isg472	1444	0.0238056	0.0014121	1e-05	-502.089		imswc496
isg248	1283	0.0561612	1e-05	1e-05	-501.536		isg194
imswc883	905	0.0307373	1e-05	0.0117942	-394.734		isg229
isg240	1003	0.0735464	1e-05	0.00978793	-439.038		isg029
isg183	1080	0.0717764	1e-05	0.0118841	-403.461		isg114
imswc822	1126	0.036378	1e-05	0.0219505	-494.398		isg477
imswc083	1117	0.0510832	1e-05	0.0168935	-459.542		isg412
isg215	1093	0.039435	1e-05	0.0125725	-400.341		isg302
isg233	1523	0.00756714	0.00148348	0.0016149	-472.99		imswc598
imswc380	1421	0.0444194	0.00168951	0.0015515	-543.012		isg363
imswc710	1264	0.0331003	1e-05	0.0177356	-501.267		imswc322
isg418	1368	0.0387789	1e-05	0.00744612	-476.966		imswc744
isg029	870	0.0221704	1e-05	0.0275452	-387.938		isg159
isg200	1406	0.0709395	1e-05	0.000419275	-438.435		isg259
isg014	1078	0.13053	1e-05	1e-05	-476.098		imswc335
isg273	791	0.0621559	1e-05	0.0113994	-361.029		imswc710
isg298	985	0.0324585	1e-05	0.0133755	-438.909		imswc200
isg454	957	0.0415798	1e-05	0.0188332	-425.812		isg455
isg114	1290	0.04692	1e-05	0.00294501	-454.912		imswc749
imswc411	822	0.0331747	1e-05	0.0222201	-402.372		isg396
imswc058	1249	0.039871	1e-05	0.00954857	-455.334		isg177
isg068	1144	0.037067	1e-05	0.0146422	-454.362		isg313
imswc363	1360	0.0432949	1e-05	0.0021685	-456.139		imswc637
imswc317	926	0.0233736	1e-05	0.0364882	-425.376		imswc398
isg178	923	0.0234984	1e-05	0.0234835	-405.144		isg037
imswc600	708	0.0161465	1e-05	0.0287472	-321.36		isg380
isg221	1369	0.054496	0.00163982	0.00476787	-541.44		isg342
imswc813	1201	0.0437464	1e-05	0.00914283	-479.522		isg460
imswc819	1020	0.0537381	1e-05	0.0135938	-457.668		isg317
imswc871	949	0.0560548	1e-05	0.0247588	-442.942		isg116
isg371	774	0.0455606	1e-05	0.0414693	-377.153		imswc264
imswc770	645	0.0654697	1e-05	0.0315978	-333.283		imswc960
isg324	1515	0.0385029	0.00192682	1e-05	-495.366		isg267
imswc512	1518	0.0377157	1e-05	0.00140755	-489.839		isg068
imswc224	1294	0.0186602	1e-05	0.0156937	-459.135		isg190
imswc056	1325	0.0529532	1e-05	0.00101643	-482.893		imswc006
imswc472	1462	0.00729127	0.00170927	1e-05	-414.951		imswc354
isg228	1469	0.0488176	1e-05	1e-05	-476.931		isg076
isg354	1278	0.0449566	1e-05	1e-05	-398.811		imswc486
isg021	716	0.0385243	1e-05	0.0168786	-309.452		isg448
isg033	641	0.0160447	0.002522	0.0409435	-318.993		isg379
isg132	1265	0.0340211	1e-05	1e-05	-450.701		imswc686
imswc002	1386	0.0356558	0.00161752	0.00589843	-516.752		imswc219
isg263	1096	0.0439551	1e-05	0.0234816	-478.651		imswc015
isg050	1068	0.0385064	1e-05	0.0262443	-428.509		imswc016
imswc836	688	0.023419	1e-05	0.082131	-361.876		isg215
isg289	510	0.0272153	1e-05	0.0543863	-266.857		isg435
imswc256	1397	0.0277551	1e-05	0.00661904	-565.788		isg036
imswc348	1206	0.0676699	1e-05	0.0063817	-492.092		isg459
imswc372	1343	0.0654581	1e-05	0.00914395	-482.491		isg349
imswc354	1233	0.0382725	1e-05	0.0135238	-515.477		isg167
imswc765	1345	0.0245822	1e-05	0.00335142	-415.326		imswc830
isg170	1091	0.0386359	1e-05	0.0188681	-470.166		imswc252
imswc793	1511	0.0378075	0.0018409	1e-05	-477.198		imswc730
imswc671	1225	0.0396186	1e-05	0.00918518	-449.274		isg480
imswc438	984	0.062055	1e-05	0.00884975	-410.2		isg085
imswc181	960	0.0599209	0.00256347	0.0203726	-444.481		isg287
isg275	772	0.0239041	1e-05	0.0186334	-318.429		imswc813
imswc948	1429	0.0744371	1e-05	0.00216628	-482.198		isg285
imswc595	658	0.0269933	1e-05	0.0123948	-289.439		imswc942
imswc350	1402	0.0699584	1e-05	0.000945324	-520.9		imswc371
imswc208	1024	0.0657638	1e-05	0.0209458	-450.112		imswc778
isg315	1082	0.0589513	0.0022691	0.0124717	-448.684		imswc950
imswc066	1381	0.0438487	1e-05	0.00223367	-477.816		imswc790
isg272	1470	0.0194317	1e-05	0.00138375	-433.409		isg133
imswc936	1060	0.0356313	0.00107224	0.0170061	-449.76		isg122
imswc617	1548	0.0292898	1e-05	0.000361417	-439.215		isg345
imswc596	1245	0.0364911	1e-05	0.00512478	-442.635		imswc800
imswc494	1454	0.0250946	0.00150179	0.00382102	-499.857		imswc214
imswc834	1346	0.0363586	0.00140394	0.00725509	-545.358		imswc273
imswc046	912	0.050644	1e-05	0.0224346	-400.481		isg225
isg157	1315	0.0332839	1e-05	0.0062481	-473.99		imswc460
isg382	1173	0.0283824	1e-05	0.00539591	-407.922		imswc936
isg329	1447	0.0523872	1e-05	0.00406383	-499.003		imswc468
imswc594	1539	0.0276519	1e-05	0.00535602	-466.779		imswc557
imswc262	1352	0.0640048	1e-05	0.0051559	-467.328		isg061
imswc470	1110	0.0355779	1e-05	0.00683707	-461.516		imswc012
isg360	1146	0.030076	1e-05	0.0148452	-447.437		isg288
imswc598	1303	0.0404027	1e-05	0.00996578	-464.528		isg124
isg277	856	0.0317611	1e-05	0.0240917	-383.679		isg038
isg383	904	0.042165	1e-05	0.0248595	-414.21		imswc056
imswc198	640	0.0454866	1e-05	0.111385	-378.157		imswc784
isg136	1040	0.0322793	1e-05	0.0146258	-392.568		imswc766
imswc416	1214	0.0593761	1e-05	0.00830619	-520.503		isg073
isg230	1405	0.0392696	0.00111884	0.00285783	-477.688		imswc332
imswc241	642	0.067496	0.00302006	0.0231658	-324.362		imswc806
imswc643	825	0.0779777	1e-05	0.0129356	-337.438		isg274
imswc439	585	0.0422155	1e-05	0.0469621	-302.861		imswc655
imswc460	1065	0.038169	1e-05	0.0155195	-466.074		imswc903
imswc686	1538	0.0497472	1e-05	0.0021856	-497.655		imswc722
imswc230	817	0.028193	1e-05	0.0593859	-418.273		imswc931
isg057	1113	0.0589947	1e-05	0.0169055	-446.117		imswc412
isg261	600	0.046691	1e-05	0.0234585	-310.927		isg258
isg374	1094	0.0321449	1e-05	0.00755925	-447.401		isg372
imswc569	1571	0.014692	1e-05	0.0053253	-447.146		isg056
imswc744	990	0.0299063	1e-05	0.020724	-405.661		isg301
imswc191	1038	0.0823602	1e-05	0.056025	-600.913		imswc411
isg102	812	0.0223361	1e-05	0.022602	-347.589		isg021
imswc330	511	0.00996155	1e-05	0.0547944	-259.652		imswc922
imswc690	1479	0.0277245	1e-05	0.00739277	-476.162		imswc333
isg155	1133	0.033714	1e-05	0.0289965	-478.52		isg072
isg415	1382	0.0335057	0.00227288	0.00184604	-448.162		isg077
isg265	1163	0.0327266	1e-05	0.00690146	-414.195		imswc516
imswc096	972	0.0873358	0.00252751	0.0190648	-470.433		isg277
isg368	1416	0.0199365	1e-05	1e-05	-487.239		imswc733
isg086	857	0.0426825	1e-05	0.0225247	-398.073		imswc238
isg209	1124	0.0461156	1e-05	0.0209198	-432.645		isg440
imswc394	960	0.0631229	1e-05	0.0240017	-460.284		isg239
isg120	847	0.0395828	1e-05	0.0185665	-391.897		isg172
imswc468	1259	0.0499727	1e-05	0.00373293	-433.367		isg248
imswc212	982	0.0578763	1e-05	0.0250537	-446.147		isg008
imswc788	997	0.0567158	1e-05	0.0537059	-515.923		isg329
imswc400	1378	0.056453	1e-05	0.00118537	-503.706		isg089
imswc353	704	0.062127	1e-05	0.0413831	-376.936		isg355
imswc730	654	0.0307896	1e-05	0.0216349	-302.401		imswc302
imswc786	1313	0.0510659	1e-05	0.00689679	-570.541		imswc502
isg291	1443	0.0464025	0.00175099	1e-05	-523.851		isg356
isg389	1235	0.0300223	1e-05	0.00257934	-421.866		imswc073
imswc838	811	0.0771678	1e-05	0.0287078	-382.956		isg321
imswc642	1454	0.0238348	1e-05	0.00162234	-464.856		isg212
imswc886	1459	0.0572241	1e-05	0.00800662	-508.062		imswc898
isg294	1144	0.0569094	1e-05	0.00930031	-458.233		isg044
isg009	1016	0.040691	1e-05	0.0251684	-428.02		isg465
isg124	747	0.0199897	1e-05	0.0338845	-327.495		imswc588
imswc045	1283	0.0359413	1e-05	0.00673081	-454.942		isg427
isg189	1212	0.0297844	1e-05	0.0134776	-464.315		imswc719
imswc032	1041	0.131999	1e-05	0.00487073	-469.834		isg419
isg381	1051	0.0568168	1e-05	0.0059049	-459.125		isg016
imswc719	1163	0.0414462	0.00196149	0.0138777	-456.313		imswc935
imswc412	713	0.0293172	1e-05	0.0258203	-346.287		isg170
imswc829	625	0.0478618	1e-05	0.065359	-366.294		isg290
isg398	1520	0.0205815	0.00179746	1e-05	-463.039		imswc795
imswc520	1475	0.0136924	0.00169301	0.00365351	-484.141		isg207
isg213	1372	0.036007	1e-05	0.00448667	-503.297		imswc400
imswc093	1453	0.0269653	1e-05	0.00172555	-471.988		imswc375
isg079	976	0.0313367	1e-05	0.0120648	-387.854		imswc776
isg271	760	0.0381295	1e-05	0.0310207	-354.745		imswc555
isg072	976	0.0422095	1e-05	0.0134771	-417.036		imswc804
isg167	1112	0.0355326	1e-05	0.0167919	-432.534		isg175
imswc942	957	0.0382839	1e-05	0.0148395	-411.009		imswc493
imswc504	635	0.0652692	1e-05	0.0691037	-364.556		imswc874
isg151	1159	0.0468274	1e-05	1e-05	-485.493		imswc718
isg116	1001	0.0405616	1e-05	0.0108598	-422.489		imswc786
isg268	893	0.0633985	1e-05	0.012731	-368.549		imswc560
imswc402	1116	0.0743449	0.00248213	0.00798417	-435.841		isg408
isg327	690	0.0327593	1e-05	0.0286035	-329.346		imswc393
imswc528	720	0.117541	1e-05	0.0183443	-398.537		isg120
isg283	576	0.051184	1e-05	0.0466808	-324.646		isg105
imswc682	642	0.0531502	0.00335611	0.0694355	-375.071		imswc547
isg080	1414	0.0224575	1e-05	0.00352275	-503.096		isg161
imswc848	1458	0.0215612	1e-05	0.00192966	-482.711		imswc822
isg039	452	0.0196828	1e-05	0.144681	-273.761		imswc669
imswc664	1542	0.0277017	1e-05	1e-05	-476.764		imswc287
isg128	1122	0.0299695	1e-05	0.0101166	-466.697		imswc870
imswc217	1228	0.0268159	1e-05	0.0123999	-467.098		isg279
imswc370	1050	0.0460293	1e-05	0.0154633	-445.922		imswc337
isg370	902	0.0300704	1e-05	0.0312466	-382.651		imswc509
imswc542	1532	0.0648387	1e-05	0.00157014	-443.645		imswc365
imswc371	603	0.0463871	1e-05	0.00680542	-285.308		imswc457
isg414	1352	0.0371381	0.000177252	0.00336138	-507.886		isg466
isg348	1042	0.0587922	1e-05	0.00865999	-428.358		imswc599
isg468	1329	0.0240809	1e-05	0.00991809	-459.354		imswc802
imswc659	746	0.0292546	1e-05	0.0451824	-349.932		imswc939
imswc791	734	0.0520156	1e-05	0.0366205	-344.186		imswc899
imswc450	1217	0.0339455	1e-05	0.00920217	-492.2		imswc429
isg046	922	0.0237061	1e-05	0.00884158	-377.834		imswc263
isg180	1453	0.0586925	0.00189657	0.0019452	-497.989		isg033
imswc681	799	0.0355582	1e-05	0.0591719	-404.283		isg253
isg310	935	0.0266942	1e-05	0.016082	-402.874		imswc564
imswc061	693	0.052839	0.00568392	0.0394466	-361.842		imswc317
imswc300	731	0.0601561	1e-05	0.0851337	-409.805		imswc367
imswc444	988	0.0538665	1e-05	0.012646	-421.071		imswc413
isg034	723	0.0754016	1e-05	1e-05	-313.131		imswc085
isg459	1225	0.0406212	1e-05	0.0114986	-490.324		imswc707
imswc688	1467	0.0251676	1e-05	0.00765891	-506.654		imswc566
isg201	1071	0.0453037	0.00182789	0.0229915	-467.213		imswc189
isg008	1288	0.0488814	1e-05	0.00746005	-447.965		isg471
isg105	886	0.0256421	0.00125988	0.0313251	-380.003		imswc461
imswc090	759	0.0575022	1e-05	0.0117695	-336.239		isg376
imswc279	999	0.0789328	1e-05	0.0237366	-520.158		isg454
isg353	675	0.0309052	1e-05	0.0373352	-322.653		isg326
imswc655	530	0.0342681	1e-05	0.0205785	-249.015		imswc038
imswc154	981	0.0210691	1e-05	0.0179415	-413.4		isg196
isg226	1250	0.0125577	1e-05	0.00439526	-403.45		imswc095
isg317	903	0.0315675	0.0022951	0.0175257	-377.184		isg401
imswc944	1609	0.039846	0.00274556	0.00230198	-461.97		imswc897
imswc338	1157	0.0554496	1e-05	0.0104116	-443.642		imswc670
imswc009	614	0.0121314	1e-05	0.0597747	-297.95		imswc035
isg048	926	0.0161098	1e-05	0.0163674	-358.036		imswc434
isg312	1094	0.0252098	1e-05	0.0170689	-435.638		isg221
imswc328	1523	0.0173339	0.0015968	0.000926835	-438.54		isg276
isg427	1020	0.0383629	1e-05	0.0188153	-417.789		imswc070
isg477	1240	0.0272117	1e-05	0.0228627	-523.321		imswc582
imswc006	1137	0.0301836	1e-05	0.0216068	-478.514		isg062
imswc930	1503	0.0302773	1e-05	0.00338118	-483.995		isg370
imswc706	817	0.0424798	1e-05	0.0528045	-421.292		isg327
isg036	1216	0.041354	1e-05	0.0106803	-455.455		imswc370
imswc674	631	0.0376605	1e-05	0.0533123	-333.472		isg054
isg047	861	0.0428319	1e-05	0.026292	-347.913		imswc792
imswc479	832	0.0684078	1e-05	0.0288655	-387.682		isg445
imswc723	538	0.0190834	1e-05	0.0435499	-270.899		imswc887
imswc896	1542	0.024569	1e-05	1e-05	-491.362		imswc732
imswc845	755	0.0306035	1e-05	0.0439675	-376.057		isg206
isg206	1411	0.0544495	0.00272986	0.00487649	-450.677		isg262
isg466	715	0.0321026	1e-05	0.0269155	-309.305		isg180
isg442	690	0.0441387	1e-05	0.0311429	-323.265		imswc723
isg112	1331	0.029345	1e-05	0.0143378	-472.674		isg155
isg297	1113	0.0304135	1e-05	0.00869076	-411.294		isg381
isg027	1118	0.0384498	1e-05	0.00460126	-397.253		isg237
imswc336	734	0.0915202	1e-05	0.0257929	-367.862		imswc476
isg075	1193	0.0169264	1e-05	0.0126895	-434.135		isg182
isg249	1018	0.021108	1e-05	0.0129034	-393.289		isg333
isg270	629	0.0214501	1e-05	0.0211444	-271.337		imswc233
isg204	1264	0.0287296	1e-05	0.00857073	-463.739		isg260
imswc547	781	0.0424049	1e-05	0.0158498	-347.977		imswc860
isg207	675	0.0418431	1e-05	0.0157785	-293.539		imswc932
isg379	748	0.0217779	1e-05	0.0301039	-343.508		imswc339
imswc445	770	0.0360295	1e-05	0.0388883	-369.512		imswc387
imswc287	1255	0.049767	1e-05	0.00872081	-460.323		isg384
imswc926	1424	0.071108	1e-05	0.0024045	-472.764		imswc346
isg362	681	0.0532184	1e-05	0.023208	-335.352		isg186
isg352	1447	0.0223827	1e-05	0.00319923	-463.715		imswc428
imswc957	1392	0.0427352	1e-05	0.00268567	-437.033		isg322
imswc781	1079	0.0382965	1e-05	0.0260163	-453.834		imswc943
isg085	797	0.0394706	0.00221899	0.0109063	-358.276		imswc383
imswc518	1266	0.0735883	1e-05	0.0049402	-439.525		isg028
isg355	789	0.0341444	1e-05	0.022386	-343.511		isg308
imswc599	671	0.0190409	1e-05	0.040053	-323.8		isg325
imswc290	1116	0.0388101	1e-05	0.00870629	-447.845		imswc255
imswc229	517	0.0415392	1e-05	0.0667891	-294.925		isg235
isg343	475	0.055815	1e-05	0.0232937	-252.784		isg095
imswc567	730	0.10175	1e-05	0.0276479	-327.867		imswc781
imswc022	1265	0.0273404	1e-05	0.0125786	-483.187		isg130
imswc464	1397	0.0357209	1e-05	0.0011558	-470.781		imswc024
imswc333	1306	0.0477552	1e-05	0.00777858	-432.763		imswc040
imswc086	590	0.0823309	1e-05	0.100833	-385.596		isg050
imswc722	622	0.0155281	1e-05	0.0395448	-283.241		imswc330
imswc467	514	0.0765534	1e-05	0.0304806	-306.099		isg299
imswc316	590	0.0157339	1e-05	0.0530542	-301.077		imswc313
imswc373	642	0.0378339	1e-05	0.0490428	-345.382		isg366
imswc459	1248	0.0297332	1e-05	0.00848726	-448.39		imswc877
isg284	1443	0.047424	1e-05	1e-05	-438.072		isg086
imswc085	1416	0.0458224	0.0049366	0.00924083	-506.076		imswc886
imswc358	1071	0.156652	1e-05	0.00524072	-424.038		imswc647
imswc908	1448	0.0252839	0.00115188	0.0131754	-555.861		imswc307
imswc646	1268	0.0166469	0.00163562	0.0164302	-473.529		imswc696
imswc612	1505	0.0216786	0.00189283	0.000861642	-473.242		imswc455
imswc876	1518	0.0404779	1e-05	0.00109849	-491.521		imswc658
imswc628a	634	0.0412071	1e-05	0.038063	-310.518		imswc708
imswc153	1208	0.0272989	1e-05	0.0127086	-464.177		imswc299
isg444	783	0.0545733	1e-05	0.0171765	-350.183		imswc756
imswc576	725	0.0758385	1e-05	0.0203613	-349.935		imswc082
imswc802	598	0.0329952	1e-05	0.0261365	-287.549		isg009
isg025	1409	0.0280325	1e-05	0.00523015	-422.253		imswc338
isg299	698	0.0313384	1e-05	0.0335556	-324.941		isg319
imswc758	1385	0.0415816	1e-05	1e-05	-473.738		isg357
isg440	1438	0.0548432	0.00113409	1e-05	-469.346		imswc180
imswc274	995	0.0357988	1e-05	0.012679	-379.914		isg252
isg002	707	0.0504741	1e-05	0.0232714	-329.068		isg127
isg203	1008	0.0221462	1e-05	0.0175395	-391.333		isg294
imswc921	560	0.0260907	1e-05	0.0603552	-297.338		isg350
imswc934	1337	0.0166871	0.00134596	0.00599579	-465.556		isg295
imswc205	801	0.0340742	1e-05	0.0454492	-395.786		imswc542
imswc335	1000	0.0374919	1e-05	0.013326	-426.207		isg173
imswc509	1186	0.0422717	0.00487301	0.011579	-422.522		imswc444
isg408	1282	0.0511087	1e-05	0.00696319	-496.264		isg069
isg060	1035	0.0204088	1e-05	0.0142312	-414.936		isg383
imswc157	828	0.058697	1e-05	0.0302157	-419.861		isg022
imswc406	746	0.0635418	1e-05	0.0187566	-352.764		isg209
isg152	1458	0.0125868	0.00164284	1e-05	-458.588		imswc311
imswc398	1334	0.0398607	1e-05	0.0112932	-544.647		imswc819
imswc573	1260	0.0369072	1e-05	0.00412483	-432.492		isg263
imswc943	899	0.0490633	1e-05	0.0146672	-406.197		isg348
imswc461	917	0.0457234	0.00108188	0.0134895	-403.166		imswc253
isg028	789	0.0248297	1e-05	0.0391112	-363.926		isg426
isg006	684	0.0344492	1e-05	0.0107515	-269.452		isg438
imswc863	531	0.0920252	1e-05	0.0690223	-331.215		imswc379
imswc616	1595	0.0271396	0.00189076	1e-05	-450.473		imswc416
imswc038	853	0.0380518	1e-05	0.0225852	-398.249		isg410
isg406	1284	0.0236367	1e-05	0.00473172	-376.308		imswc083
isg064	1292	0.0278168	1e-05	0.00396598	-472.508		isg365
imswc259	738	0.0314903	1e-05	0.0531476	-368.99		isg353
imswc452	962	0.0635562	1e-05	0.0179181	-416.164		imswc352
imswc945	703	0.0182611	0.00270363	0.0194587	-319.673		imswc562
imswc469	812	0.0674937	1e-05	0.0234448	-354.137		imswc316
isg246	570	0.0389626	1e-05	0.00814065	-243.026		isg278
imswc221	486	0.0531911	0.00383611	0.0334623	-284.254		isg070
imswc393	912	0.0320296	1e-05	0.026048	-409.596		imswc885
imswc448	1406	0.0219361	1e-05	0.00679335	-466.575		isg059
imswc492	1277	0.034651	0.00108416	0.0113129	-463.848		isg118
imswc931	669	0.0303569	1e-05	0.0247606	-312.189		isg047
isg388	903	0.0763874	1e-05	0.0165405	-407.024		isg271
imswc912	1249	0.107328	1e-05	0.00795621	-468.043		imswc262
imswc932	1424	0.0562182	1e-05	0.00709916	-423.679		imswc946
imswc478	679	0.0697959	0.0015123	0.0356703	-373.906		imswc090
isg055	625	0.0443362	1e-05	0.0281648	-296.91		isg296
imswc297	953	0.0204942	0.00104472	0.0251327	-381.696		isg115
isg174	981	0.0564232	0.000137358	0.0283725	-464.199		imswc692
imswc030	689	0.0338553	1e-05	0.0467453	-357.257		isg227
isg393	1406	0.026168	1e-05	0.00751911	-489.294		imswc615
isg231	1278	0.0277785	1e-05	0.0169319	-468.759		imswc611
imswc379	679	0.0209397	1e-05	0.0467086	-327.895		isg201
imswc739	892	0.0221864	1e-05	0.0197448	-357.316		isg261
isg017	940	0.032974	1e-05	0.0162745	-357.446		imswc575
imswc345	913	0.0466905	1e-05	0.0276586	-404.865		imswc568
imswc885	781	0.0463995	1e-05	0.0226389	-371.621		imswc250
isg386	1504	0.0238639	0.00177694	1e-05	-458.919		imswc814
imswc589	1092	0.0403518	1e-05	0.00886486	-379.626		imswc787
imswc514	586	0.030499	1e-05	0.0497568	-307.391		imswc527
imswc040	1270	0.0581801	1e-05	0.00621153	-461.985		imswc350
imswc903	1164	0.0465154	1e-05	0.00838723	-454.757		imswc438
imswc431	625	0.0545809	1e-05	0.0713379	-345.932		imswc515
isg293	516	0.0285842	1e-05	0.0713332	-281.649		isg119
imswc807	676	0.100998	1e-05	0.0259038	-347.508		imswc334
imswc740	1482	0.0106831	1e-05	0.000877634	-400.14		imswc057
isg117	553	0.0112721	1e-05	0.0204026	-254.414		isg200
imswc502	1297	0.0503196	0.00194251	0.00438346	-467.508		isg323
imswc733	1119	0.047713	1e-05	0.0081465	-409.375		imswc713
isg363	1242	0.0394638	1e-05	0.0109472	-447.526		imswc651
imswc924	1449	0.0135752	1e-05	0.00753046	-463.818		isg444
imswc239	638	0.0611303	1e-05	0.0506899	-341.723		imswc009
imswc258	1597	0.0124753	1e-05	0.000894901	-427.916		imswc951
imswc709	675	0.0358767	1e-05	0.0620004	-340.001		isg232
imswc383	1211	0.0619236	1e-05	0.00195736	-412.996		isg318
isg040	1238	0.0829706	1e-05	0.006641	-450.97		isg453
isg259	598	1e-05	1e-05	0.0507291	-278.216		imswc728
imswc051	1261	0.171623	1e-05	0.00341685	-484.654		isg082
imswc774	1346	0.0330941	1e-05	0.0102517	-560.318		imswc249
imswc254	1442	0.0382021	1e-05	0.00178581	-492.131		isg055
imswc534	1316	0.0175862	1e-05	0.0117694	-472.004		isg347
isg154	1321	0.0410563	0.0017482	0.00154785	-454.308		imswc563
isg193	1124	0.0268498	1e-05	0.0110691	-437.061		imswc857
isg044	1410	0.05516	1e-05	0.00188393	-406.125		imswc046
imswc951	988	0.0536666	1e-05	0.0182699	-429.489		imswc342
isg438	848	0.051676	1e-05	0.0159651	-368.682		isg088
imswc204	678	0.0556056	1e-05	0.0262693	-332.522		imswc304
imswc787	538	0.0118543	1e-05	0.0587995	-287.168		isg214
imswc017	1103	0.0267285	1e-05	0.0115545	-414.338		isg375
imswc611	835	0.0424309	1e-05	0.0275688	-352.951		imswc926
isg035	526	0.0440897	1e-05	0.0462136	-271.154		isg273
imswc897	1105	0.0437645	1e-05	0.0169435	-437.531		isg315
imswc255	1160	0.055674	1e-05	0.00851321	-405.089		isg002
imswc177	642	0.0455916	1e-05	0.0306159	-343.616		imswc361
isg323	605	0.0173478	1e-05	0.0540841	-308.591		isg336
isg110	1179	0.065965	0.00234409	0.0160957	-468.926		imswc680
imswc728	726	0.0579521	1e-05	0.014184	-316.508		imswc828
isg059	573	0.0316972	1e-05	0.0373969	-287.559		imswc348
isg024	498	0.0275567	1e-05	0.0660832	-282.955		imswc918
imswc091	608	0.0431321	1e-05	0.048434	-310.717		imswc345
imswc526	1136	0.0213884	1e-05	0.000732432	-389.521		imswc477
isg311	1111	0.017468	1e-05	0.0112521	-401.164		imswc092
imswc282	703	0.0515378	1e-05	0.0744587	-379.383		imswc659
imswc384	880	0.146999	1e-05	0.00784168	-359.522		imswc034
imswc055	507	0.0877796	1e-05	0.0289457	-259.749		imswc845
isg196	708	0.0278053	1e-05	0.0328351	-334.138		imswc372
imswc390	857	0.0816461	1e-05	0.014103	-379.493		isg254
imswc015	987	0.0310482	1e-05	0.0209009	-411.879		imswc445
isg407	1408	0.0350839	1e-05	1e-05	-445.686		imswc237
imswc510	590	0.0303324	1e-05	1e-05	-272.558		imswc020
isg318	687	0.0420532	1e-05	0.0299669	-320.472		isg442
imswc814	783	0.0337195	1e-05	0.0367347	-389.859		imswc726
isg162	602	0.0310346	0.00527709	0.0480905	-287.27		isg034
imswc060	1072	0.0803817	1e-05	0.0144173	-467.836		imswc958
imswc638	1622	0.0186304	1e-05	0.000991675	-421.746		imswc454
isg225	845	0.0404342	1e-05	0.0131816	-364.568		isg057
imswc202	788	0.0161402	1e-05	0.0632119	-399.95		isg403
imswc246	723	0.166686	1e-05	0.0357269	-395.623		imswc833
isg103	485	0.00866384	1e-05	0.0351286	-235.178		isg198
imswc263	1186	0.045481	1e-05	0.0139305	-468.224		isg268
isg431	1398	0.0313099	1e-05	1e-05	-444.632		imswc177
isg125	883	0.0173591	1e-05	0.0254804	-353.094		isg264
imswc743	759	0.0270991	0.00241373	0.00884406	-320.621		isg067
imswc562	605	0.0372937	1e-05	0.0311663	-303.738		isg078
imswc031	465	0.0220707	1e-05	0.0901277	-273.555		isg362
imswc270	630	0.0772109	1e-05	0.0246313	-311.074		imswc080
isg332	1337	0.0206119	0.00150238	0.000522419	-489.386		isg043
imswc615	877	0.0406059	1e-05	0.0293686	-396.255		imswc948
imswc672	894	0.0775256	1e-05	0.0205394	-432.395		imswc277
imswc824	1245	0.107514	1e-05	0.00831699	-458.081		imswc275
imswc855	613	0.05072	1e-05	0.0766067	-360.718		imswc441
isg328	1466	0.0183789	1e-05	1e-05	-442.944		imswc271
imswc442	1151	0.0751344	1e-05	0.0111601	-460.712		isg334
imswc179	711	0.0176181	0.00252301	0.0271924	-296.325		imswc685
isg347	431	0.0450631	1e-05	0.0276204	-212.254		isg031
imswc320	1402	0.0232952	0.00139644	0.00207046	-500.68		isg098
imswc368	1509	0.0255169	1e-05	0.00147203	-438.913		imswc518
imswc312	719	0.0303431	1e-05	0.00410327	-284.096		isg140
imswc183	833	0.0929969	1e-05	0.0173606	-392.1		imswc471
isg043	502	0.031412	0.00338259	0.0417062	-264.209		isg343
imswc685	1165	0.0372409	1e-05	0.0405182	-514.757		imswc424
isg037	787	0.0227844	1e-05	0.0283935	-346.166		imswc261
imswc658	527	0.0347434	1e-05	0.0307949	-254.878		imswc628a
imswc550	1230	0.0305011	1e-05	0.0121405	-460.174		imswc202
isg239	1103	0.0381492	1e-05	0.017942	-450.402		imswc205
isg013	1276	0.0281097	1e-05	0.0105349	-415.125		imswc364
imswc397	442	0.0791065	1e-05	0.0210398	-214.624		imswc705
isg254	1190	0.0608752	0.0016805	0.0121277	-532.339		isg286
isg260	910	0.0440186	1e-05	0.0191705	-377.991		imswc843
isg305	917	0.372182	1e-05	0.0323483	-457.53		imswc514
imswc707	714	0.0366992	0.00287069	0.020456	-324.896		imswc699
imswc648	595	0.0257044	1e-05	0.0575808	-320.812		imswc347
imswc356	1322	0.0866015	1e-05	0.00834467	-413.018		imswc030
imswc471	588	0.05471	1e-05	0.0240666	-280.964		imswc621
isg197	857	0.0206417	1e-05	0.0252656	-355.953		imswc871
imswc541	980	0.0718663	0.00229837	0.0127465	-383.425		imswc349
imswc271	613	0.0495446	1e-05	0.0278443	-300.318		imswc220
imswc337	492	1e-05	1e-05	0.0586297	-254.906		imswc753
imswc140	890	0.388031	0.0142186	0.0776117	-542.794		imswc452
isg337	532	0.112975	1e-05	0.0721363	-318.421		isg289
isg480	1359	0.0439144	1e-05	0.00865927	-496.777		imswc360
isg169	1615	0.0351508	1e-05	1e-05	-397.617		imswc204
isg143	666	0.0246308	1e-05	0.0220269	-303.552		isg148
imswc792	745	0.0306303	0.00360455	0.0273661	-362.881		isg394
imswc261	538	0.058274	1e-05	0.0208806	-248.403		isg282
imswc790	1271	0.0267794	1e-05	0.0265798	-538.28		imswc050
imswc780	1255	0.0362761	0.0018049	1e-05	-466.858		imswc406
isg456	1118	0.0146028	1e-05	0.00866456	-371.81		imswc409
isg267	1030	0.0412466	1e-05	0.0103967	-380.91		isg109
imswc454	725	0.0384691	0.00304162	0.0342684	-356.82		imswc181
imswc430	564	0.0473258	1e-05	0.0557657	-304.804		imswc212
imswc073	1029	0.0455134	1e-05	0.0112097	-434.006		imswc648
isg258	1152	0.035846	1e-05	0.0193074	-448.548		isg240
isg453	624	0.0265923	1e-05	0.0454596	-318.657		isg251
imswc779	516	0.036697	1e-05	0.051978	-288.995		imswc047
imswc369	433	0.0405968	1e-05	0.104033	-278.938		imswc941
isg078	561	0.0207029	0.00323015	0.0524277	-282.718		isg134
imswc035	897	0.0193322	1e-05	0.0414208	-401.38		isg183
isg236	1557	0.00856877	1e-05	0.000212571	-410.232		imswc344
isg395	1392	0.0412036	1e-05	0.00694272	-466.344		isg162
imswc884	1530	0.0235112	0.00194654	1e-05	-447.657		isg110
imswc386	611	0.0222727	1e-05	0.0264979	-267.272		isg218
isg156	1388	0.0465899	0.000307846	1e-05	-485.66		imswc259
isg366	872	0.0351902	1e-05	0.029888	-381.271		imswc402
isg095	974	0.0499973	1e-05	0.0143117	-368.796		isg135
imswc797	980	0.0907452	1e-05	0.0123002	-456.627		isg174
imswc249	1063	0.0504893	1e-05	0.0220113	-419.109		imswc851
imswc662	1365	0.0262228	0.00195234	0.00443876	-425.79		isg373
isg069	642	0.0271896	1e-05	0.039742	-309.438		imswc854
isg274	887	0.0430969	1e-05	0.0116555	-380.756		imswc442
imswc851	547	0.0246593	1e-05	0.0602965	-290.9		imswc094
imswc288	970	0.139179	1e-05	0.0230799	-428.035		imswc921
isg465	547	0.0223741	1e-05	0.0346832	-282.823		imswc392
imswc220	640	0.0414858	1e-05	0.0396868	-310.625		isg074
imswc347	472	0.0427923	1e-05	0.0376752	-256.423		imswc703
imswc441	669	0.0425489	1e-05	0.0343221	-343.817		imswc208
isg279	854	0.037067	1e-05	0.0214715	-345.15		imswc404
isg300	755	0.240649	1e-05	0.04048	-411.968		imswc373
imswc519	494	0.108822	1e-05	0.0202503	-276.208		imswc541
imswc346	1082	0.0476741	1e-05	0.015809	-424.847		isg371
imswc624	852	0.0926762	1e-05	0.0154677	-391.96		imswc551
isg130	776	0.0218254	0.00247407	0.0400579	-350.542		imswc394
isg295	801	0.0330858	1e-05	0.0333176	-364.539		imswc230
imswc840	484	0.025402	1e-05	0.0739416	-286.743		imswc768
imswc077	472	0.0737781	1e-05	0.0511648	-279.289		imswc754
imswc694	1274	0.0295549	1e-05	0.0111502	-448.836		imswc791
imswc334	760	0.046381	1e-05	0.0248891	-334.871		imswc779
imswc670	1162	0.05403	1e-05	0.00671652	-403.603		imswc157
isg031	476	0.0413318	1e-05	0.0367382	-243.457		imswc227
isg181	1039	0.0183683	1e-05	0.0150591	-371.45		imswc439
imswc016	1339	0.0472346	1e-05	0.0047156	-420.363		isg040
imswc429	958	0.0308741	1e-05	0.0285172	-413.366		imswc852
imswc404	890	0.0718232	1e-05	0.0150381	-382.503		imswc449
imswc960	889	0.0516155	1e-05	1e-05	-340.561		imswc359
imswc925	851	0.0142109	1e-05	0.0299508	-355.434		isg035
imswc862	676	0.0697201	1e-05	0.0385464	-328.709		imswc221
isg070	1007	0.0630779	1e-05	0.00586632	-329.08		imswc195
imswc192	1000	0.0722204	1e-05	0.0197028	-478.262		imswc643
imswc828	1081	0.0647714	0.000879299	0.00828783	-432.632		imswc895
imswc486	1291	0.0477163	1e-05	0.00411141	-427.851		imswc469
isg115	448	0.0350383	1e-05	0.0344593	-246.144		imswc674
isg106	545	0.0851034	1e-05	0.0340588	-259.243		imswc894
imswc377	626	0.274628	1e-05	0.0296605	-359.616		imswc091
imswc647	771	0.0204258	1e-05	0.0448187	-360.723		imswc192
isg309	686	0.0369539	0.000769613	0.0543903	-363.374		isg309
isg473	1458	0.0238627	1e-05	0.00474386	-452.699		isg388
isg076	950	0.0233546	1e-05	0.0284621	-430.084		imswc503
isg463	623	0.013087	1e-05	0.0225987	-269.526		isg024
imswc778	517	0.0210086	1e-05	0.0322349	-249.681		imswc241
imswc359	852	0.0805217	1e-05	0.00976348	-320.271		imswc681
imswc893	789	0.0268075	1e-05	0.021767	-377.955		imswc060
imswc425	1272	0.0382466	1e-05	0.00749748	-450.939		imswc019
isg346	751	0.137947	1e-05	0.0226914	-367.43		imswc356
imswc891	1496	0.0208738	1e-05	1e-05	-478.263		imswc158
isg358	1040	0.0285296	1e-05	0.0140086	-405.415		imswc706
imswc816	800	0.0664794	0.00676979	0.0352394	-417.978		imswc390
imswc716	533	0.0435194	1e-05	0.0653793	-285.62		imswc576
isg081	588	0.0198342	1e-05	0.0271598	-256.924		imswc291
isg058	866	0.00969914	1e-05	0.0235895	-336.361		imswc770
imswc214	833	0.0224824	1e-05	0.0310799	-378.835		imswc479
isg335	807	0.0805753	1e-05	0.0283597	-347.032		isg283
imswc649	1562	0.00207286	1e-05	0.00619022	-415.636		imswc709
imswc435	1491	0.0141657	1e-05	0.00516414	-462.45		imswc061
isg089	949	0.0180619	1e-05	0.0384423	-415.953		imswc672
imswc306	1340	0.0226019	1e-05	1e-05	-446.607		isg417
imswc298	1191	0.0210931	1e-05	0.0132432	-405.077		imswc840
imswc104	901	0.404314	1.02032e-05	0.0494521	-536.778		isg293
imswc449	522	0.0297028	1e-05	0.0605166	-298.885		imswc397
imswc818	467	0.0575203	1e-05	0.051999	-252.752		imswc381
isg192	1266	0.0239974	1e-05	0.00558948	-405.325		imswc079
isg234	911	0.01586	0.00298652	0.0235174	-359.911		imswc270
isg118	794	0.03679	1e-05	0.0323162	-345.073		imswc310
imswc462	428	0.0428615	1e-05	0.0777247	-249.856		imswc748
imswc747	1375	0.0227988	1e-05	0.00354271	-431.169		imswc279
isg032	1358	0.0268086	1e-05	1e-05	-368.869		imswc797
isg179	883	0.0148911	1e-05	0.0264513	-354.24		imswc430
isg269	1043	0.0146381	1e-05	0.012671	-359.782		imswc421
imswc034	652	0.0276274	0.00195737	0.0449143	-318.644		imswc353
isg351	506	0.0112304	1e-05	0.0276395	-237.785		imswc720
imswc068	1014	0.236265	0.00402747	0.0188879	-468.547
isg308	883	0.0336804	1e-05	0.0302676	-397.927
imswc364	716	0.045186	1e-05	0.0344761	-344.023
imswc134	629	0.5	0.00120823	0.176405	-492.288
imswc164	1000	0.167742	1e-05	0.0198682	-465.802
isg133	522	0.0157353	1e-05	0.0377143	-254.45
isg316	805	0.252533	1e-05	0.0387413	-409.976
imswc376	1499	0.0183017	0.00197533	1e-05	-448.576
imswc622	1035	0.0331385	1e-05	0.0155632	-397.886
imswc047	678	0.0470171	0.00295606	0.0335523	-336.411
imswc291	1220	0.0894158	0.00128922	0.00558671	-434.152
imswc050	950	0.0760882	1e-05	0.00611804	-344.618
imswc143	585	0.5	0.00984849	0.196788	-486.566
imswc753	441	0.0320515	0.00288716	0.046541	-244.344
isg126	581	0.284242	1e-05	0.035079	-332.579
isg177	1003	0.0402652	0.00205207	0.00871704	-410.381
isg250	469	0.0345792	1e-05	1e-05	-250.404
imswc072	781	0.0227063	1e-05	0.018345	-348.206
imswc240	503	0.0618147	0.00272972	0.0832418	-315.598
isg135	459	0.0148041	1e-05	0.0700764	-257.177
isg023	914	0.0856487	1e-05	0.0199353	-393.815
imswc299	467	0.0229514	1e-05	0.0426972	-252.623
isg223	1012	0.336519	1e-05	0.00575411	-467.338
imswc355	554	0.0934655	1e-05	0.0337167	-290.679
isg127	435	0.0355436	1e-05	0.0306259	-220.97
imswc307	453	0.0383642	1e-05	0.0269347	-223.246
imswc705	710	0.0314154	1e-05	0.0483316	-360.41
imswc808	1594	0.0306929	1e-05	0.00403414	-438.927
isg385	697	0.0178149	1e-05	0.0304019	-279.023
imswc680	548	0.0268014	0.00494165	0.0421732	-281.912
imswc826	488	0.0691079	1e-05	0.0786975	-286.688
imswc327	446	0.0902375	1e-05	0.0380714	-269.812
isg010	635	0.0189512	1e-05	0.0235786	-271.769
imswc018	1487	0.012125	1e-05	0.00120418	-452.989
isg404	1409	0.021747	0.00178229	1e-05	-434.532
imswc525	1444	0.0427202	0.00205893	0.00141306	-469.771
imswc367	587	0.0436403	1e-05	0.0162946	-272.838
isg417	1142	0.090001	0.00278116	0.00594359	-470.688
imswc158	1147	0.0858273	1e-05	0.00943934	-447.529
isg042	684	0.0149958	0.00339746	1e-05	-285.651
imswc079	458	0.047019	1e-05	0.0534582	-251.004
imswc861	638	0.0583898	1e-05	0.0466701	-351.832
imswc141	614	0.5	0.0345028	0.176028	-484.254
imswc116	618	0.5	0.0829524	0.126619	-432.089
imswc678	1438	0.0407884	1e-05	0.00254925	-469.087
imswc024	750	0.0200892	1e-05	0.0442755	-349.388
isg122	464	0.00377722	1e-05	0.0496811	-240.844
imswc873	1291	0.017454	1e-05	0.0116161	-490.066
isg216	1340	0.0312097	1e-05	0.00490525	-448.488
isg476	1520	0.0225115	1e-05	0.0026298	-509.727
isg338	559	0.0234328	1e-05	0.0190508	-265.6
imswc833	704	0.032291	1e-05	0.0437579	-348.691
imswc227	460	0.0137245	1e-05	0.0753538	-240.948
imswc366	444	0.124094	1e-05	0.0362935	-257.502
imswc956	902	0.0194577	1e-05	0.0268068	-361.332
imswc322	620	0.0105214	1e-05	0.0399656	-271.033
imswc749	1353	0.0509949	1e-05	1e-05	-453.78
imswc375	947	0.0379255	1e-05	0.0197695	-403.073
isg098	487	0.0252984	1e-05	0.0529728	-233.164
imswc864	475	0.164577	1e-05	0.0455871	-292.217
imswc108	586	0.5	0.0316212	0.109431	-399.492
isg171	1370	0.0264732	1e-05	0.00675686	-421.342
isg030	552	0.0150741	1e-05	0.0256333	-255.805
imswc323	595	0.169796	1e-05	0.0308011	-349.866
isg251	473	0.0206401	1e-05	0.0626971	-263.904
isg342	796	0.0359259	1e-05	0.0153644	-325.834
imswc551	510	0.029262	1e-05	0.0577708	-278.694
imswc156	513	0.0781834	1e-05	0.0560427	-294.797
imswc663	756	0.104754	1e-05	0.0195845	-316.287
imswc515	634	0.0476599	1e-05	0.0235171	-282.033
isg199	849	0.00789907	1e-05	0.0358951	-368.098
isg187	802	0.0148232	1e-05	0.0314339	-350.854
imswc311	699	0.0342728	1e-05	0.0328242	-326.367
isg121	1320	0.0331927	1e-05	0.010051	-434.336
imswc413	542	0.0108873	1e-05	0.0490833	-263.119
imswc455	444	0.0296161	0.00431391	0.0314584	-223.785
isg148	681	0.0489737	1e-05	0.0329587	-327.211
imswc374	1169	0.0205676	1e-05	0.00425378	-414.915
imswc088	671	0.132677	1e-05	0.0512965	-394.258
isg282	491	0.0275572	1e-05	0.0544707	-275.747
imswc434	773	0.0210512	1e-05	0.0398362	-345.64
imswc054	1246	0.0210438	1e-05	0.0111064	-497.921
isg142	870	0.238736	1e-05	0.0463993	-422.034
isg330	629	0.0158601	1e-05	0.0239669	-293.914
isg149	603	0.0111494	1e-05	0.0248295	-269.938
imswc777	447	0.0266268	1e-05	0.01311	-229.769
isg321	920	0.0454138	1e-05	0.011321	-358.444
imswc799	455	0.0543247	1e-05	0.0667955	-256.867
imswc841	1550	0.0184795	1e-05	1e-05	-458.964
imswc954	551	0.120729	1e-05	0.0245623	-251.983
isg087	670	0.00774307	0.00359374	0.0363443	-280.962
isg113	540	0.0224	1e-05	0.0260891	-251.226
LVR
F2.001	1696	0.0265705	1e-05	0.000988198	-526.859		F2.001
F2.002	1624	0.0125409	1e-05	0.00615998	-537.47		F2.002
F2.003	1735	0.00655518	1e-05	1e-05	-515.195		F2.003
F2.004	1699	0.0121686	1e-05	0.00243952	-536.648		F2.004
F2.005	1732	0.00823468	1e-05	1e-05	-516.283		F2.005
F2.006	1658	0.00568182	1e-05	0.00418729	-532.502		F2.006
F2.007	1590	0.00673176	1e-05	0.0105775	-502.914		F2.007
F2.008	1501	0.00458959	1e-05	0.00479106	-451.117		F2.008
F2.010	1443	0.0127382	0.00108728	0.0108188	-502.781		F2.010
F2.011	1699	0.00595357	1e-05	0.00301412	-565.327		F2.011
F2.012	1685	0.00886708	1e-05	0.00251024	-493.145		F2.012
F2.013	1571	0.0117981	1e-05	0.00642122	-535.76		F2.013
F2.015	1510	0.0177597	1e-05	0.00580813	-496.958		F2.015
F2.016	1837	0.00624373	1e-05	1e-05	-441.529		F2.016
F2.017	1655	0.00976271	1e-05	0.00491219	-517.501		F2.017
F2.018	1795	0.00767051	1e-05	0.00088348	-438.961		F2.018
F2.019	1637	0.0137366	1e-05	0.00752468	-533.193		F2.019
F2.020	1660	0.0145077	1e-05	0.00128251	-561.03		F2.020
F2.021	1624	0.021838	1e-05	0.0107578	-585.913		F2.021
F2.022	1633	0.00887568	1e-05	0.0106029	-528.974		F2.022
F2.023	1734	0.00732359	1e-05	0.00141434	-490.873		F2.023
F2.024	1532	0.0157725	1e-05	0.00403901	-517.981		F2.024
F2.025	1773	1e-05	1e-05	0.00104872	-438.618		F2.025
F2.026	1489	0.00910052	1e-05	0.0106023	-454.55		F2.026
F2.027	1704	0.00998872	1e-05	0.00651259	-530.381		F2.027
F2.029	1693	0.0126904	1e-05	0.00168203	-529.837		F2.029
F2.030	1726	0.00843607	1e-05	1e-05	-466.877		F2.030
F2.031	1453	0.0133524	1e-05	0.00894205	-475.009		F2.031
F2.032	1697	0.0104956	1e-05	0.00081338	-511.219		F2.032
F2.033	1414	0.010965	1e-05	0.0129495	-487.889		F2.033
F2.034	1751	0.00273254	1e-05	1e-05	-472.194		F2.034
F2.035	1526	0.0145013	1e-05	0.00859494	-516.779		F2.035
F2.036	1799	0.00219271	1e-05	0.00245635	-491.407		F2.036
F2.037	1739	1e-05	1e-05	0.000867383	-437.697		F2.037
F2.038	1503	0.013294	1e-05	0.0134515	-468.629		F2.038
F2.039	1522	0.0145252	1e-05	0.00827523	-499.999		F2.039
F2.040	1724	0.00839693	1e-05	0.00202604	-444.842		F2.040
F2.043	1565	0.0232947	0.00114523	0.00648271	-540.039		F2.043
F2.045	1704	0.0177686	0.00154713	0.00310636	-541.126		F2.045
F2.046	1503	0.0199302	1e-05	0.00900968	-466.07		F2.046
F2.049	1467	0.0267196	1e-05	0.00687351	-539.364		F2.049
F2.050	1699	0.0169632	1e-05	0.00276531	-487.382		F2.050
F2.051	1742	0.0127114	1e-05	1e-05	-502.09		F2.051
F2.054	1657	0.00378615	1e-05	0.00903472	-497.418		F2.054
F2.056	1547	0.0190595	1e-05	0.0102467	-482.86		F2.056
F2.057	1641	0.0248475	1e-05	0.00557467	-552.971		F2.057
F2.058	1383	0.017887	1e-05	0.0200767	-526.318		F2.058
F2.059	1676	0.0219626	1e-05	1e-05	-513.48		F2.059
F2.060	1674	0.00539046	1e-05	0.00694044	-474.204		F2.060
F2.061	1540	0.0151665	1e-05	0.0204972	-522.372		F2.061
F2.062	1759	0.0206374	1e-05	1e-05	-488.948		F2.062
F2.063	1419	0.0131273	1e-05	0.013613	-499.055		F2.063
F2.064	1784	0.00514443	1e-05	0.000757281	-424.404		F2.064
F2.065	1578	0.0139742	1e-05	0.00806915	-534.41		F2.065
F2.066	1723	0.0148888	1e-05	0.00401389	-582.111		F2.066
F2.067	1624	0.0111939	1e-05	0.00907482	-523.073		F2.067
F2.068	1598	0.0173321	1e-05	0.00507787	-540.928		F2.068
F2.069	1527	0.0163119	1e-05	0.00927624	-494.262		F2.069
F2.070	1627	1e-05	1e-05	0.00852786	-496.42		F2.070
F2.071	1611	0.0161653	1e-05	0.00780047	-572.084		F2.071
F2.072	1489	0.0111776	1e-05	0.0107363	-498.492		F2.072
F2.073	1276	0.0166465	0.00121398	0.0152916	-446.257		F2.073
F2.074	1462	0.0169725	1e-05	0.0128126	-515.391		F2.074
F2.075	1709	0.0124655	1e-05	0.00145609	-491.042		F2.075
F2.076	1520	0.0163261	1e-05	0.00871791	-511.918		F2.076
F2.077	1679	0.0122571	1e-05	0.010045	-581.192		F2.077
F2.078	1472	0.0208871	1e-05	0.008658	-505.662		F2.078
F2.079	1498	0.0231042	0.00202324	0.00721993	-498.855		F2.079
F2.080	1743	1e-05	1e-05	0.00208058	-420.649		F2.080
F2.081	1504	0.0153779	1e-05	0.0121103	-490.18		F2.081
F2.082	1734	0.0147848	1e-05	1e-05	-531.723		F2.082
F2.083	1357	0.0152781	0.00114562	0.0298703	-530.875		F2.083
F2.084	1696	0.0159156	1e-05	0.00366006	-574.881		F2.084
F2.085	1733	0.0113299	1e-05	0.00100849	-399.056		F2.085
F2.086	1477	0.0137798	1e-05	0.0149867	-519.953		F2.086
F2.087	1246	0.0184664	1e-05	0.0408258	-524.727		F2.087
F2.088	1713	0.00803061	1e-05	0.00178105	-535.74		F2.088
F2.089	1346	0.0146124	1e-05	0.0169855	-464.275		F2.089
F2.090	1305	0.0147401	1e-05	0.01804	-476.491		F2.090
F2.091	1292	0.0331201	1e-05	0.0181851	-483.783		F2.091
F2.092	1755	0.013759	1e-05	0.00109845	-483.431		F2.092
F2.094	1286	0.0297158	1e-05	0.0412609	-537.983		F2.094
F2.095	1598	0.0119819	1e-05	0.011496	-503.401		F2.095
F2.098	1549	0.0188546	1e-05	0.0140118	-519.667		F2.098
F2.099	1669	0.0100864	1e-05	0.000984907	-491.627		F2.099
F2.100	1537	0.0251742	1e-05	0.0374606	-649.36		F2.100
F2.101	1548	0.0163652	1e-05	0.0142516	-548.282		F2.101
F2.102	1605	0.0116773	1e-05	0.0126981	-548.264		F2.102
F2.103	1229	0.0196132	1e-05	0.0396815	-526.536		F2.103
F2.104	1455	0.0131981	1e-05	0.0203899	-549.127		F2.104
F2.105	1544	0.0169153	1e-05	0.0163519	-527.804		F2.105
F2.107	1734	0.00921672	1e-05	1e-05	-513.986		F2.107
F2.108	1719	0.0119856	1e-05	0.00264704	-520.969		F2.108
F2.109	1506	0.0135492	1e-05	0.0285749	-576.246		F2.109
F2.110	1711	0.00717143	1e-05	1e-05	-532.271		F2.110
F2.111	1339	0.0228177	1e-05	0.0137224	-505.144		F2.111
F2.113	1541	0.0115518	1e-05	0.0229549	-523.551		F2.113
F2.114	1722	0.0171942	1e-05	0.000655214	-512.25		F2.114
F2.115	1685	0.0232344	1e-05	0.00908902	-553.955		F2.115
F2.116	1717	0.019734	1e-05	0.00782162	-590.747		F2.116
F2.117	1573	0.00692202	1e-05	0.0128335	-513.448		F2.117
F2.119	1628	0.0265755	1e-05	0.00587954	-505.141		F2.119
F2.120	1485	0.00901833	0.00197854	0.0180829	-510.063		F2.120
F2.121	1730	0.0131304	1e-05	0.00390485	-510.534		F2.121
F2.123	1621	0.020781	1e-05	0.00410543	-535.671		F2.123
F2.124	1265	0.0296031	1e-05	0.0284201	-526.123		F2.124
F2.125	1289	0.0493054	1e-05	0.0155434	-481.033		F2.125
F2.128	1641	0.0114192	0.000965702	0.00409723	-551.712		F2.128
F2.129	1243	0.0223591	1e-05	0.0214751	-481.63		F2.129
F2.130	1528	0.0133404	1e-05	0.00840911	-492.918		F2.130
F2.132	1450	0.0243173	1e-05	0.0146914	-531.494		F2.132
F2.133	1595	0.00586931	1e-05	0.00713901	-528.162		F2.133
F2.134	1328	0.0185859	1e-05	0.0287311	-525.587		F2.134
F2.138	1383	0.0244078	1e-05	0.0160447	-466.282		F2.138
F2.139	1390	0.0269476	1e-05	0.0154707	-456.307		F2.139
F2.140	1791	0.0146035	1e-05	1e-05	-465.656		F2.140
F2.141	1566	0.0154873	1e-05	0.00778038	-468.535		F2.141
F2.142	1704	0.00972761	1e-05	0.00160302	-486.982		F2.142
F2.146	1533	0.0164341	1e-05	0.0110137	-509.19		F2.146
F2.147	1671	0.0148464	1e-05	0.00565708	-572.12		F2.147
F2.148	1474	0.0255161	1e-05	0.0102742	-545.888		F2.148
F2.149	1463	0.0136544	1e-05	0.0188551	-497.831		F2.149
F2.150	1545	0.0164614	1e-05	0.0121909	-508.333		F2.150
F2.152	1375	0.0165108	1e-05	0.0120942	-461.563		F2.152
F2.153	1642	0.00790783	1e-05	0.00868536	-483.058		F2.153
F2.156	1514	0.0160693	0.000991061	0.0123575	-563.867		F2.156
F2.157	1360	0.0139745	1e-05	0.0245897	-506.589		F2.157
F2.158	1631	0.0202824	1e-05	0.00803005	-563.296		F2.158
F2.160	1673	0.00916057	1e-05	0.00288368	-540.029		F2.160
F2.161	1387	0.0157162	1e-05	0.0143624	-547.826		F2.161
F2.162	1515	0.0115731	0.000332469	0.0116026	-528.235		F2.162
F2.163	1547	0.0311721	1e-05	0.0172255	-655.765		F2.163
F2.164	1569	0.00831036	1e-05	0.0111313	-482.676		F2.164
F2.165	1342	0.0194125	1e-05	0.0224354	-537.519		F2.165
F2.166	1428	0.0288379	1e-05	0.0219394	-575.564		F2.166
F2.167	1415	0.0234533	1e-05	0.015848	-534.496		F2.167
F2.168	1236	0.00949254	1e-05	0.0314111	-470.018		F2.168
F2.169	1626	0.0188715	0.00198931	0.0107439	-554.644		F2.169
F2.172	1339	0.0112015	1e-05	0.0190924	-471.834		F2.172
F2.173	1328	0.00894648	1e-05	0.0157808	-472.67		F2.173
F2.174	1299	0.0226762	1e-05	0.0350842	-520.033		F2.174
F2.176	1638	0.0182072	1e-05	0.00537221	-497.915		F2.176
F2.177	1269	0.0103869	1e-05	0.018968	-459.606		F2.177
F2.178	1538	0.0058769	1e-05	0.0261912	-572.953		F2.178
F2.179	1197	0.0236904	1e-05	0.0453058	-519.878		F2.179
F2.180	1575	0.0147989	0.00162817	0.0147363	-532.275		F2.180
F2.181	1497	0.00823808	1e-05	0.0224577	-502.096		F2.181
F2.182	1363	0.0166029	0.00141229	0.0292845	-560.541		F2.182
F2.184	1533	0.00907622	1e-05	0.00991916	-506.609		F2.184
F2.188	1695	0.0124027	1e-05	0.00196691	-503.889		F2.188
F2.189	1265	0.0283889	1e-05	0.0262853	-520.327		F2.189
F2.190	1292	0.0250659	1e-05	0.0311661	-504.217		F2.190
F2.191	1350	0.0226908	1e-05	0.0420546	-556.208		F2.191
F2.193	1278	0.00710552	1e-05	0.0224882	-467.015		F2.193
F2.194	1684	0.0165815	1e-05	0.00217435	-494.893		F2.194
F2.195	1769	0.00917001	1e-05	0.00338479	-551.965		F2.195
F2.196	1655	0.0143838	1e-05	1e-05	-490.807		F2.196
F2.197	1688	0.0122335	1e-05	0.00365613	-478.49		F2.197
F2.198	1668	0.00466948	1e-05	0.00500834	-513.912		F2.198
F2.199	1307	0.01952	0.00273873	0.00789118	-414.03		F2.199
F2.200	1573	0.0119663	1e-05	0.00531293	-507.351		F2.200
F2.201	1634	0.015791	1e-05	0.00328241	-564.107		F2.201
F2.202	1428	0.0152475	1e-05	0.00998425	-503.247		F2.202
F2.203	1612	0.0138896	1e-05	0.000265827	-547.775		F2.203
F2.204	1620	0.0181699	1e-05	0.00666148	-526.264		F2.204
F2.205	1484	0.0226153	1e-05	0.0136976	-524.13		F2.205
F2.206	1781	0.00893086	1e-05	0.00233822	-481.469		F2.206
F2.207	1357	0.0136512	0.000244072	0.0124013	-469.274		F2.207
F2.208	1330	0.0583053	1e-05	0.00493078	-504.698		F2.208
F2.209	1504	0.0178972	1e-05	0.0183579	-536.478		F2.209
F2.210	1660	0.00839354	1e-05	0.0107734	-589.379		F2.210
F2.212	1649	0.0118415	1e-05	0.00562233	-445.589		F2.212
F2.213	1392	0.0189031	1e-05	0.013401	-468.893		F2.213
F2.214	1591	0.00718848	1e-05	0.013458	-533.86		F2.214
F2.215	1723	0.0185887	0.00195703	0.00313971	-519.092		F2.215
F2.217	1748	0.00551337	1e-05	1e-05	-529.799		F2.217
F2.218	1406	0.0178337	0.000394954	0.0249886	-543.264		F2.218
F2.219	1667	0.0125702	1e-05	0.0120271	-536.175		F2.219
F2.220	1575	0.010974	1e-05	0.0102893	-518.56		F2.220
F2.221	1701	0.0136033	1e-05	0.000733098	-491.929		F2.221
F2.222	1484	0.0116364	1e-05	0.00906055	-526.242		F2.222
F2.223	1507	0.00779452	1e-05	0.0106448	-494.611		F2.223
F2.224	1720	0.00872795	1e-05	1e-05	-491.888		F2.224
F2.225	1197	0.00352344	1e-05	0.0271037	-454.253		F2.225
F2.226	1650	0.00630839	1e-05	0.0098645	-564.57		F2.226
F2.227	1273	0.0205166	1e-05	0.0194807	-495.489		F2.227
F2.228	1639	0.0137827	1e-05	0.0019581	-519.368		F2.228
F2.229	1725	0.0111435	1e-05	1e-05	-483.848		F2.229
F2.230	1427	0.0111551	1e-05	0.0122869	-478.536		F2.230
F2.232	1738	0.00855427	1e-05	1e-05	-547.561		F2.232
F2.233	1332	0.0272154	1e-05	0.00847059	-458.279		F2.233
F2.234	1278	0.0164697	1e-05	0.0125803	-478.561		F2.234
F2.235	1294	0.00551438	0.000779087	0.0177879	-474.453		F2.235
F2.237	1555	0.0153331	1e-05	0.0095898	-534.935		F2.237
F2.238	1530	0.0262153	1e-05	0.00759678	-529.487		F2.238
F2.239	1486	0.0114801	1e-05	0.0195247	-492.909		F2.239
F2.241	1734	0.00433406	1e-05	0.00179792	-496.883		F2.241
F2.242	1598	0.0155588	1e-05	0.00789247	-506.472		F2.242
F2.243	1447	0.00853862	1e-05	0.0311181	-574.187		F2.243
F2.244	1543	0.0218829	1e-05	0.00621679	-533.349		F2.244
F2.245	1202	0.0228729	1e-05	0.0191684	-505.012		F2.245
F2.246	1453	0.0305476	0.00123117	0.0120015	-582.251		F2.246
F2.247	1380	0.0284131	0.00199592	0.0121741	-515.422		F2.247
F2.249	1455	0.0227809	1e-05	0.0223219	-522.061		F2.249
F2.250	1770	0.00825972	1e-05	1e-05	-495.664		F2.250
