# Supplementary material for: GOOGA: A platform to synthesize mapping experiments and identify genomic structural diversity
Source: PLoS Comput Biol. 2019 Apr 15;15(4):e1006949. doi: 10.1371/journal.pcbi.1006949 (PMC6483263; doi:10.1371/journal.pcbi.1006949)
Supplement: S3 Table — The last marker of each chromosome gives the map lnLk. (XLSX) [file pcbi.1006949.s020.xlsx]

## Sheet: Sheet1
num	Chrom	Mapping pop	v1 scaff	interval	rate (or Lnlk for neg values)
1	1	IMF3	853	0	0.0714242
2	1	IMF3	79	0	0
3	1	IMF3	79	100000	0.00450873
4	1	IMF3	79	200000	0.0308884
5	1	IMF3	79	300000	0.0284881
6	1	IMF3	79	400000	0.0310102
7	1	IMF3	79	600000	0
8	1	IMF3	79	700000	0
9	1	IMF3	79	800000	0.0130231
10	1	IMF3	79	900000	0.00706342
11	1	IMF3	79	1000000	0.0213285
12	1	IMF3	69	0	0.00926756
13	1	IMF3	69	100000	0.0113363
14	1	IMF3	69	200000	0
15	1	IMF3	69	300000	0.0117234
16	1	IMF3	69	500000	0
17	1	IMF3	69	600000	0.0268736
18	1	IMF3	69	800000	0
19	1	IMF3	69	900000	0.0181804
20	1	IMF3	69	1100000	0
21	1	IMF3	69	1200000	0.0276661
22	1	IMF3	181	0	0.0194729
23	1	IMF3	181	100000	0.0313044
24	1	IMF3	181	200000	0.0154413
25	1	IMF3	181	300000	0.010159
26	1	IMF3	559	0	0.0110163
27	1	IMF3	60	0	0
28	1	IMF3	60	100000	0.0387335
29	1	IMF3	60	200000	0
30	1	IMF3	60	300000	0.00320993
31	1	IMF3	60	400000	0.00293872
32	1	IMF3	60	500000	0.00296194
33	1	IMF3	60	600000	0
34	1	IMF3	60	700000	0.00530604
35	1	IMF3	60	800000	0.0488741
36	1	IMF3	60	900000	0
37	1	IMF3	60	1000000	0.0349302
38	1	IMF3	60	1100000	0.00382883
39	1	IMF3	60	1200000	0
40	1	IMF3	60	1300000	0.0492317
41	1	IMF3	60	1400000	0.00191627
42	1	IMF3	333	0	0
43	1	IMF3	333	100000	0.00278895
44	1	IMF3	165	0	0
45	1	IMF3	165	100000	0.0276949
46	1	IMF3	165	200000	0.0129991
47	1	IMF3	165	300000	0.0208465
48	1	IMF3	362	100000	0.0429583
49	1	IMF3	308	100000	0.0161332
50	1	IMF3	26b	400000	0.00392575
51	1	IMF3	26b	300000	0
52	1	IMF3	26b	200000	0.00753223
53	1	IMF3	26b	100000	5.95967e-05
54	1	IMF3	1184	0	0.00385428
55	1	IMF3	240	100000	0
56	1	IMF3	314	0	0.00486827
57	1	IMF3	314	100000	0.0163443
58	1	IMF3	82	1000000	0
59	1	IMF3	82	800000	0
60	1	IMF3	82	700000	0
61	1	IMF3	82	600000	0.00558871
62	1	IMF3	82	300000	0.0154191
63	1	IMF3	82	200000	0.0180839
64	1	IMF3	82	100000	0.0044701
65	1	IMF3	82	0	0.00578042
66	1	IMF3	115b	0	0.00604908
67	1	IMF3	115b	100000	0
68	1	IMF3	115b	200000	0
69	1	IMF3	115b	300000	0
70	1	IMF3	232	100000	0
71	1	IMF3	232	300000	0
72	1	IMF3	83a	100000	0
73	1	IMF3	187	0	0
74	1	IMF3	146	0	0
75	1	IMF3	563	0	0
76	1	IMF3	74	400000	0.00231572
77	1	IMF3	74	1100000	0.00234759
78	1	IMF3	80a	0	0.00737689
79	1	IMF3	80a	300000	0
80	1	IMF3	80a	400000	0
81	1	IMF3	80a	500000	0.00365666
82	1	IMF3	80a	600000	0.0220256
83	1	IMF3	80a	700000	0.0125102
84	1	IMF3	80a	800000	-2564.98
1586	1	DUNTIL	79	0	0
1587	1	DUNTIL	79	100000	0.0145725
1588	1	DUNTIL	79	200000	0.0140043
1589	1	DUNTIL	79	300000	0.0434015
1590	1	DUNTIL	79	400000	0.0167187
1591	1	DUNTIL	79	500000	0.016486
1592	1	DUNTIL	79	600000	0.0175061
1593	1	DUNTIL	79	700000	0.00694211
1594	1	DUNTIL	79	800000	0.00872905
1595	1	DUNTIL	79	900000	0
1596	1	DUNTIL	79	1000000	0.00732365
1597	1	DUNTIL	79	1100000	0.00736683
1598	1	DUNTIL	69	0	0
1599	1	DUNTIL	69	100000	0.00243856
1600	1	DUNTIL	69	200000	0.00479034
1601	1	DUNTIL	69	300000	0.00882295
1602	1	DUNTIL	69	500000	0.00624609
1603	1	DUNTIL	69	600000	0.00971272
1604	1	DUNTIL	69	700000	0
1605	1	DUNTIL	69	800000	0.00775609
1606	1	DUNTIL	69	900000	0.0123526
1607	1	DUNTIL	69	1000000	0.00674036
1608	1	DUNTIL	69	1100000	0.00313114
1609	1	DUNTIL	69	1200000	0
1610	1	DUNTIL	181	0	0.00787467
1611	1	DUNTIL	181	100000	0
1612	1	DUNTIL	181	200000	0.0157806
1613	1	DUNTIL	181	300000	0.0103611
1614	1	DUNTIL	181	400000	0.00973716
1615	1	DUNTIL	181	500000	0.0068623
1616	1	DUNTIL	60	0	0.00209174
1617	1	DUNTIL	60	100000	0.0155495
1618	1	DUNTIL	60	200000	0.00755353
1619	1	DUNTIL	60	300000	0.00598858
1620	1	DUNTIL	60	400000	0.0146634
1621	1	DUNTIL	60	500000	0
1622	1	DUNTIL	60	600000	0.00249908
1623	1	DUNTIL	60	700000	0
1624	1	DUNTIL	60	800000	0.00981107
1625	1	DUNTIL	60	900000	0.0127292
1626	1	DUNTIL	60	1000000	0.0109203
1627	1	DUNTIL	60	1100000	0.0100062
1628	1	DUNTIL	60	1200000	0.00851766
1629	1	DUNTIL	60	1300000	0.0202413
1630	1	DUNTIL	333	0	0
1631	1	DUNTIL	333	100000	0.0222902
1632	1	DUNTIL	165	0	0
1633	1	DUNTIL	165	100000	0.0118821
1634	1	DUNTIL	165	200000	0.0146854
1635	1	DUNTIL	165	400000	0.00720829
1636	1	DUNTIL	362	100000	0
1637	1	DUNTIL	308	100000	0.0176365
1638	1	DUNTIL	26b	400000	0
1639	1	DUNTIL	26b	300000	0
1640	1	DUNTIL	26b	200000	0.0247635
1641	1	DUNTIL	240	200000	0.00761943
1642	1	DUNTIL	82	1000000	0.00867885
1643	1	DUNTIL	82	800000	0.00291369
1644	1	DUNTIL	82	700000	0
1645	1	DUNTIL	82	600000	0
1646	1	DUNTIL	82	500000	0
1647	1	DUNTIL	82	400000	0.00351948
1648	1	DUNTIL	82	300000	0
1649	1	DUNTIL	82	200000	0.00973414
1650	1	DUNTIL	82	100000	0.0256688
1651	1	DUNTIL	82	0	0.0463929
1652	1	DUNTIL	427	0	0.0570319
1653	1	DUNTIL	115b	100000	0.0183577
1654	1	DUNTIL	115b	200000	0
1655	1	DUNTIL	115b	300000	0
1656	1	DUNTIL	115b	400000	0
1657	1	DUNTIL	232	100000	0.0026534
1658	1	DUNTIL	232	300000	0
1659	1	DUNTIL	83a	100000	0
1660	1	DUNTIL	83a	0	0.00889381
1661	1	DUNTIL	187	0	0
1662	1	DUNTIL	146	0	0
1663	1	DUNTIL	146	100000	0.00822927
1664	1	DUNTIL	146	200000	0
1665	1	DUNTIL	80a	0	0
1666	1	DUNTIL	80a	100000	0.0119013
1667	1	DUNTIL	80a	200000	0
1668	1	DUNTIL	80a	300000	0.00345199
1669	1	DUNTIL	80a	400000	0.00691128
1670	1	DUNTIL	80a	500000	0
1671	1	DUNTIL	80a	600000	0.00535418
1672	1	DUNTIL	80a	700000	0.0569067
1673	1	DUNTIL	80a	800000	0.0368779
1674	1	DUNTIL	80a	900000	-2750.52
3458	1	IMPR_rils	853	0	0.0284166
3459	1	IMPR_rils	79	0	0
3460	1	IMPR_rils	79	100000	0
3461	1	IMPR_rils	79	200000	0.00827281
3462	1	IMPR_rils	79	300000	0.000367852
3463	1	IMPR_rils	79	400000	0.0161271
3464	1	IMPR_rils	79	500000	0
3465	1	IMPR_rils	79	600000	0.0222866
3466	1	IMPR_rils	79	700000	0
3467	1	IMPR_rils	79	800000	0.0277269
3468	1	IMPR_rils	79	900000	0
3469	1	IMPR_rils	79	1000000	0.0304364
3470	1	IMPR_rils	79	1100000	0.0110468
3471	1	IMPR_rils	69	0	0.0223095
3472	1	IMPR_rils	69	100000	0
3473	1	IMPR_rils	69	200000	0.0209125
3474	1	IMPR_rils	69	300000	0
3475	1	IMPR_rils	69	400000	0.00685148
3476	1	IMPR_rils	69	500000	0.0068509
3477	1	IMPR_rils	69	600000	0
3478	1	IMPR_rils	69	700000	0
3479	1	IMPR_rils	69	800000	0.0109273
3480	1	IMPR_rils	69	900000	0.0164052
3481	1	IMPR_rils	69	1000000	0
3482	1	IMPR_rils	69	1100000	0.00454081
3483	1	IMPR_rils	69	1200000	0
3484	1	IMPR_rils	181	0	0.016709
3485	1	IMPR_rils	181	100000	0
3486	1	IMPR_rils	181	200000	0
3487	1	IMPR_rils	181	300000	0.0397285
3488	1	IMPR_rils	181	400000	0.00954134
3489	1	IMPR_rils	181	500000	0
3490	1	IMPR_rils	559	0	0
3491	1	IMPR_rils	60	0	0.0268787
3492	1	IMPR_rils	60	100000	0.0224106
3493	1	IMPR_rils	60	200000	0
3494	1	IMPR_rils	60	300000	0.0424904
3495	1	IMPR_rils	60	400000	0
3496	1	IMPR_rils	60	500000	0
3497	1	IMPR_rils	60	600000	0.0179702
3498	1	IMPR_rils	60	700000	0
3499	1	IMPR_rils	60	800000	0.0225557
3500	1	IMPR_rils	60	900000	0
3501	1	IMPR_rils	60	1000000	0
3502	1	IMPR_rils	60	1100000	0
3503	1	IMPR_rils	60	1200000	0.0138577
3504	1	IMPR_rils	60	1300000	0
3505	1	IMPR_rils	60	1400000	0
3506	1	IMPR_rils	333	100000	0
3507	1	IMPR_rils	333	0	0.00873422
3508	1	IMPR_rils	165	0	0.0195658
3509	1	IMPR_rils	165	100000	0
3510	1	IMPR_rils	165	200000	0
3511	1	IMPR_rils	165	300000	0
3512	1	IMPR_rils	165	400000	0.0226779
3513	1	IMPR_rils	165	500000	0
3514	1	IMPR_rils	362	100000	0
3515	1	IMPR_rils	362	0	0
3516	1	IMPR_rils	308	100000	0.0170004
3517	1	IMPR_rils	308	0	0.0314824
3518	1	IMPR_rils	314	100000	0.00652925
3519	1	IMPR_rils	314	0	0.0294063
3520	1	IMPR_rils	240	300000	0
3521	1	IMPR_rils	240	200000	0
3522	1	IMPR_rils	240	100000	0.0172153
3523	1	IMPR_rils	82	1000000	0
3524	1	IMPR_rils	82	900000	0
3525	1	IMPR_rils	82	800000	0.0172172
3526	1	IMPR_rils	82	700000	0
3527	1	IMPR_rils	82	600000	0
3528	1	IMPR_rils	82	500000	0.0144063
3529	1	IMPR_rils	82	400000	0.0144063
3530	1	IMPR_rils	82	300000	0
3531	1	IMPR_rils	82	200000	0
3532	1	IMPR_rils	82	100000	0.0147939
3533	1	IMPR_rils	427	0	0
3534	1	IMPR_rils	254b	0	0.00775619
3535	1	IMPR_rils	254b	100000	0
3536	1	IMPR_rils	80a	900000	0.00576981
3537	1	IMPR_rils	80a	800000	0
3538	1	IMPR_rils	80a	700000	0
3539	1	IMPR_rils	80a	600000	0.00806642
3540	1	IMPR_rils	80a	500000	0.0162264
3541	1	IMPR_rils	80a	400000	0
3542	1	IMPR_rils	80a	300000	0.00604171
3543	1	IMPR_rils	80a	200000	0.0060405
3544	1	IMPR_rils	80a	100000	0
3545	1	IMPR_rils	80a	0	0
3546	1	IMPR_rils	146	0	0.00621122
3547	1	IMPR_rils	146	100000	0.00582171
3548	1	IMPR_rils	146	200000	0
3549	1	IMPR_rils	115b	100000	0
3550	1	IMPR_rils	115b	200000	0
3551	1	IMPR_rils	115b	300000	0
3552	1	IMPR_rils	115b	400000	0
3553	1	IMPR_rils	187	0	0
3554	1	IMPR_rils	232	300000	0.0121179
3555	1	IMPR_rils	232	200000	0
3556	1	IMPR_rils	232	100000	0
3557	1	IMPR_rils	74	1200000	0.0123862
3558	1	IMPR_rils	74	1100000	0
3559	1	IMPR_rils	74	1000000	0
3560	1	IMPR_rils	74	600000	-1040.57
5418	1	IMNAS	79	0	0
5419	1	IMNAS	79	100000	0.0296312
5420	1	IMNAS	79	200000	0
5421	1	IMNAS	79	300000	0.0264729
5422	1	IMNAS	79	400000	0.0699215
5423	1	IMNAS	79	600000	0.0410724
5424	1	IMNAS	79	700000	0
5425	1	IMNAS	79	800000	0.0122994
5426	1	IMNAS	79	900000	0.0170201
5427	1	IMNAS	79	1000000	0
5428	1	IMNAS	79	1100000	0.00559646
5429	1	IMNAS	69	0	0.00547481
5430	1	IMNAS	69	100000	0.0055384
5431	1	IMNAS	69	200000	0.00553864
5432	1	IMNAS	69	300000	0
5433	1	IMNAS	69	400000	0.00731039
5434	1	IMNAS	69	500000	0.0210688
5435	1	IMNAS	69	600000	0
5436	1	IMNAS	69	700000	0
5437	1	IMNAS	69	800000	0.00778361
5438	1	IMNAS	69	900000	0.00844819
5439	1	IMNAS	69	1000000	0.00843109
5440	1	IMNAS	69	1100000	0
5441	1	IMNAS	69	1200000	0.00612996
5442	1	IMNAS	181	0	0.0115459
5443	1	IMNAS	181	100000	0
5444	1	IMNAS	181	200000	0.0310478
5445	1	IMNAS	181	300000	0.0130876
5446	1	IMNAS	181	400000	0.0141461
5447	1	IMNAS	60	0	0.0218829
5448	1	IMNAS	60	100000	0.0185148
5449	1	IMNAS	60	200000	0
5450	1	IMNAS	60	300000	0.0217653
5451	1	IMNAS	60	400000	0.00553704
5452	1	IMNAS	60	500000	0.0055567
5453	1	IMNAS	60	600000	0.00812625
5454	1	IMNAS	60	700000	0.0114449
5455	1	IMNAS	60	800000	0.0168864
5456	1	IMNAS	60	900000	0.0109022
5457	1	IMNAS	60	1000000	0.015947
5458	1	IMNAS	60	1100000	0.00529447
5459	1	IMNAS	60	1200000	0.01129
5460	1	IMNAS	60	1300000	0
5461	1	IMNAS	60	1400000	0
5462	1	IMNAS	333	0	0
5463	1	IMNAS	333	100000	0
5464	1	IMNAS	165	0	0
5465	1	IMNAS	165	100000	0
5466	1	IMNAS	165	200000	0.0207797
5467	1	IMNAS	165	300000	0
5468	1	IMNAS	165	400000	0.0246189
5469	1	IMNAS	308	100000	0.0156669
5470	1	IMNAS	314	100000	0.0333044
5471	1	IMNAS	314	0	0
5472	1	IMNAS	26b	400000	0
5473	1	IMNAS	26b	200000	0
5474	1	IMNAS	26b	100000	0.031702
5475	1	IMNAS	240	200000	0.0178306
5476	1	IMNAS	240	100000	0
5477	1	IMNAS	82	1000000	0.0158694
5478	1	IMNAS	82	900000	0
5479	1	IMNAS	82	800000	0.00342161
5480	1	IMNAS	82	700000	0
5481	1	IMNAS	82	600000	0
5482	1	IMNAS	82	500000	0
5483	1	IMNAS	82	400000	0.00728225
5484	1	IMNAS	82	300000	0.0128126
5485	1	IMNAS	82	200000	0.00487818
5486	1	IMNAS	82	100000	0
5487	1	IMNAS	427	0	0
5488	1	IMNAS	254b	100000	0
5489	1	IMNAS	80a	800000	0
5490	1	IMNAS	80a	700000	0
5491	1	IMNAS	80a	600000	0
5492	1	IMNAS	80a	500000	0.0202788
5493	1	IMNAS	80a	400000	0.00833942
5494	1	IMNAS	80a	300000	0
5495	1	IMNAS	80a	200000	0.0103109
5496	1	IMNAS	80a	100000	0.0302731
5497	1	IMNAS	146	0	0.0241666
5498	1	IMNAS	146	200000	0.0400019
5499	1	IMNAS	83a	100000	0
5500	1	IMNAS	74	1100000	0
5501	1	IMNAS	232	100000	0
5502	1	IMNAS	232	300000	0
5503	1	IMNAS	115b	400000	-1208.68
7265	1	IMSWC	79	0	0
7266	1	IMSWC	79	100000	0.00523631
7267	1	IMSWC	79	200000	0.00380247
7268	1	IMSWC	79	300000	0.0132253
7269	1	IMSWC	79	400000	0.0109907
7270	1	IMSWC	79	500000	0.00711174
7271	1	IMSWC	79	600000	0.0049996
7272	1	IMSWC	79	700000	0.00998437
7273	1	IMSWC	79	800000	0.00165509
7274	1	IMSWC	79	900000	0.0186574
7275	1	IMSWC	79	1000000	0.00273514
7276	1	IMSWC	79	1100000	0.00430743
7277	1	IMSWC	69	0	0.0211241
7278	1	IMSWC	69	100000	0.000584216
7279	1	IMSWC	69	200000	0.00614668
7280	1	IMSWC	69	300000	0.00523987
7281	1	IMSWC	69	400000	0.00255028
7282	1	IMSWC	69	500000	0.0148666
7283	1	IMSWC	69	600000	0.00267167
7284	1	IMSWC	69	700000	0.00332371
7285	1	IMSWC	69	800000	0.00553284
7286	1	IMSWC	69	900000	0.00934112
7287	1	IMSWC	69	1000000	0.00930513
7288	1	IMSWC	69	1100000	0
7289	1	IMSWC	69	1200000	0.00434911
7290	1	IMSWC	181	0	0.0125262
7291	1	IMSWC	181	100000	0.00507827
7292	1	IMSWC	181	200000	0.00857374
7293	1	IMSWC	181	300000	0.00531614
7294	1	IMSWC	181	400000	0.00348621
7295	1	IMSWC	181	500000	0.00454431
7296	1	IMSWC	559	0	0.00836628
7297	1	IMSWC	60	0	0.0231192
7298	1	IMSWC	60	200000	0.0225198
7299	1	IMSWC	60	300000	0.0228275
7300	1	IMSWC	60	500000	0.00635552
7301	1	IMSWC	60	600000	0.00318519
7302	1	IMSWC	60	700000	0.0164755
7303	1	IMSWC	60	800000	0.0106913
7304	1	IMSWC	60	900000	0.00318395
7305	1	IMSWC	60	1000000	0.0223975
7306	1	IMSWC	60	1100000	0.0147355
7307	1	IMSWC	60	1200000	0.0110785
7308	1	IMSWC	60	1300000	0.00277964
7309	1	IMSWC	60	1400000	0.00655353
7310	1	IMSWC	333	0	0
7311	1	IMSWC	333	100000	0.0107311
7312	1	IMSWC	165	0	0.0076286
7313	1	IMSWC	165	100000	0.0025943
7314	1	IMSWC	165	200000	0.00890088
7315	1	IMSWC	165	300000	0.00283009
7316	1	IMSWC	165	400000	0.00405548
7317	1	IMSWC	165	500000	0.00442368
7318	1	IMSWC	362	100000	0.0103476
7319	1	IMSWC	308	100000	0.0223078
7320	1	IMSWC	314	100000	0.00374961
7321	1	IMSWC	314	0	0.0173162
7322	1	IMSWC	1184	0	0.00753317
7323	1	IMSWC	26b	400000	0.0148995
7324	1	IMSWC	26b	300000	0.00885928
7325	1	IMSWC	26b	200000	0.00856113
7326	1	IMSWC	26b	100000	0.00780975
7327	1	IMSWC	240	100000	0.0195851
7328	1	IMSWC	82	1000000	0.0111361
7329	1	IMSWC	82	900000	0.0153677
7330	1	IMSWC	82	800000	0.00337794
7331	1	IMSWC	82	600000	0.00227537
7332	1	IMSWC	82	500000	0
7333	1	IMSWC	82	400000	0
7334	1	IMSWC	82	300000	0.00711942
7335	1	IMSWC	82	200000	0.00476994
7336	1	IMSWC	82	100000	0
7337	1	IMSWC	427	0	0
7338	1	IMSWC	80a	900000	0.00615411
7339	1	IMSWC	80a	800000	0.00251334
7340	1	IMSWC	80a	600000	0.000502556
7341	1	IMSWC	80a	500000	0
7342	1	IMSWC	80a	400000	0
7343	1	IMSWC	80a	300000	0.00188855
7344	1	IMSWC	80a	200000	0
7345	1	IMSWC	80a	0	0.00428932
7346	1	IMSWC	254b	100000	0.0033279
7347	1	IMSWC	83a	100000	0.00277796
7348	1	IMSWC	83a	0	0
7349	1	IMSWC	187	0	0.00159168
7350	1	IMSWC	74	1100000	0
7351	1	IMSWC	232	300000	0.00244629
7352	1	IMSWC	232	100000	0
7353	1	IMSWC	146	0	0.00198866
7354	1	IMSWC	146	100000	0.0110257
7355	1	IMSWC	146	200000	0.00532792
7356	1	IMSWC	115b	400000	0
7357	1	IMSWC	115b	300000	0.00656052
7358	1	IMSWC	115b	200000	0.0722701
7359	1	IMSWC	115b	100000	0.0387789
7360	1	IMSWC	563	0	-11906.1
665	2	IMF3	18	2100000	0
666	2	IMF3	18	2000000	0
667	2	IMF3	18	1900000	0
668	2	IMF3	18	1800000	0.0256994
669	2	IMF3	18	1600000	0.00408506
670	2	IMF3	18	1500000	0
671	2	IMF3	18	1400000	0.00922701
672	2	IMF3	18	1300000	0.0377327
673	2	IMF3	18	1200000	0.0584544
674	2	IMF3	18	1100000	0
675	2	IMF3	18	1000000	0.0105107
676	2	IMF3	18	900000	0
677	2	IMF3	18	800000	0.00328791
678	2	IMF3	18	600000	0.0162591
679	2	IMF3	18	500000	0.0380173
680	2	IMF3	18	200000	0.0266196
681	2	IMF3	18	100000	0.0112063
682	2	IMF3	18	0	0
683	2	IMF3	89	0	0.0028254
684	2	IMF3	89	100000	0.00929799
685	2	IMF3	89	200000	0.0195377
686	2	IMF3	89	400000	0.0160601
687	2	IMF3	89	500000	0.00749589
688	2	IMF3	89	600000	0.0184193
689	2	IMF3	89	700000	0.00442507
690	2	IMF3	89	800000	0.0179578
691	2	IMF3	89	900000	0.0221506
692	2	IMF3	89	1000000	0.00658295
693	2	IMF3	44a	700000	0
694	2	IMF3	44a	600000	0.00278953
695	2	IMF3	44a	500000	0.00275151
696	2	IMF3	44a	400000	0.0224479
697	2	IMF3	44a	0	0.00471579
698	2	IMF3	212	0	0.00521473
699	2	IMF3	212	100000	0.0137486
700	2	IMF3	212	200000	0.00911179
701	2	IMF3	212	300000	0.00737375
702	2	IMF3	212	400000	0.00990282
703	2	IMF3	249	0	0.0131419
704	2	IMF3	249	100000	0.00879081
705	2	IMF3	249	200000	0.00586812
706	2	IMF3	81	100000	0.00664475
707	2	IMF3	81	200000	0
708	2	IMF3	81	300000	0.0139875
709	2	IMF3	81	400000	0.0443816
710	2	IMF3	81	900000	0.0938645
711	2	IMF3	19	0	0.0435862
712	2	IMF3	19	200000	0.0114829
713	2	IMF3	19	300000	0
714	2	IMF3	19	400000	0.00269621
715	2	IMF3	19	600000	0
716	2	IMF3	19	700000	0
717	2	IMF3	19	800000	0
718	2	IMF3	19	1000000	0
719	2	IMF3	19	1100000	0
720	2	IMF3	19	1200000	0
721	2	IMF3	19	1300000	0.00557746
722	2	IMF3	112	100000	0
723	2	IMF3	112	200000	0
724	2	IMF3	112	800000	0
725	2	IMF3	216	300000	0
726	2	IMF3	216	200000	0
727	2	IMF3	216	0	0.0182601
728	2	IMF3	73	1200000	0
729	2	IMF3	73	1100000	0
730	2	IMF3	73	800000	0
731	2	IMF3	73	700000	0
732	2	IMF3	65	0	0
733	2	IMF3	65	300000	0
734	2	IMF3	65	400000	0.00191463
735	2	IMF3	65	500000	0
736	2	IMF3	65	600000	0.00794672
737	2	IMF3	65	700000	0.0170573
738	2	IMF3	65	1000000	0.033162
739	2	IMF3	42	100000	0
740	2	IMF3	42	200000	0
741	2	IMF3	42	300000	0.00296946
742	2	IMF3	42	400000	0.000119807
743	2	IMF3	42	600000	0
744	2	IMF3	42	700000	0.0395544
745	2	IMF3	42	1000000	0.0102622
746	2	IMF3	42	1500000	0
747	2	IMF3	42	1600000	0
748	2	IMF3	173	500000	0
749	2	IMF3	173	400000	0
750	2	IMF3	173	300000	0.0119831
751	2	IMF3	173	200000	0.0312822
752	2	IMF3	173	100000	6.66769e-05
753	2	IMF3	173	0	0.0233627
754	2	IMF3	41a	0	0.00157388
755	2	IMF3	41a	100000	0.0230903
756	2	IMF3	41a	200000	0
757	2	IMF3	41a	300000	0
758	2	IMF3	41a	400000	0.00255517
759	2	IMF3	41a	500000	0.0012359
760	2	IMF3	41a	600000	0
761	2	IMF3	41a	700000	0
762	2	IMF3	41a	800000	0.00578815
763	2	IMF3	41a	1100000	0
764	2	IMF3	41a	1200000	0.0274848
765	2	IMF3	41a	1300000	0.0128806
766	2	IMF3	41a	1400000	0.0105796
767	2	IMF3	41a	1500000	0
768	2	IMF3	151	0	0
769	2	IMF3	151	100000	0
770	2	IMF3	151	200000	0
771	2	IMF3	151	300000	0.00233406
772	2	IMF3	151	400000	0
773	2	IMF3	151	500000	0.0395908
774	2	IMF3	429	0	0.0797439
775	2	IMF3	27	0	0.00184462
776	2	IMF3	27	100000	0.0487854
777	2	IMF3	27	200000	0.101731
778	2	IMF3	27	1000000	0
779	2	IMF3	27	1100000	0.0123022
780	2	IMF3	27	1200000	0.0117564
781	2	IMF3	27	1300000	0.0255384
782	2	IMF3	27	1400000	0.00248406
783	2	IMF3	27	1500000	0
784	2	IMF3	27	1600000	0
785	2	IMF3	27	1700000	0
786	2	IMF3	27	1800000	0.00308428
787	2	IMF3	27	1900000	0.0111758
788	2	IMF3	27	2000000	-3834.22
2399	2	DUNTIL	18	2200000	0
2400	2	DUNTIL	18	2100000	0.00461764
2401	2	DUNTIL	18	2000000	0.0215317
2402	2	DUNTIL	18	1900000	0.0157854
2403	2	DUNTIL	18	1800000	0.0105908
2404	2	DUNTIL	18	1700000	0.00989026
2405	2	DUNTIL	18	1600000	0.00725534
2406	2	DUNTIL	18	1500000	0.00315823
2407	2	DUNTIL	18	1400000	0.00657728
2408	2	DUNTIL	18	1300000	0.00977005
2409	2	DUNTIL	18	1200000	0
2410	2	DUNTIL	18	1100000	0.00340125
2411	2	DUNTIL	18	1000000	0.0102168
2412	2	DUNTIL	18	900000	0.0104109
2413	2	DUNTIL	18	800000	0.0147936
2414	2	DUNTIL	18	700000	0.00367514
2415	2	DUNTIL	18	600000	0.00736889
2416	2	DUNTIL	18	500000	0.0157025
2417	2	DUNTIL	18	400000	0.00342319
2418	2	DUNTIL	18	300000	0.013904
2419	2	DUNTIL	18	200000	0.00731889
2420	2	DUNTIL	18	100000	0.00311592
2421	2	DUNTIL	18	0	0
2422	2	DUNTIL	89	0	0.00286125
2423	2	DUNTIL	89	100000	0.013952
2424	2	DUNTIL	89	200000	0.005278
2425	2	DUNTIL	89	300000	0.00243563
2426	2	DUNTIL	89	400000	0
2427	2	DUNTIL	89	500000	0.00980067
2428	2	DUNTIL	89	600000	0
2429	2	DUNTIL	89	700000	0.0076128
2430	2	DUNTIL	89	800000	0.00637766
2431	2	DUNTIL	89	900000	0.00324542
2432	2	DUNTIL	89	1000000	0.0049434
2433	2	DUNTIL	44a	700000	0
2434	2	DUNTIL	44a	600000	0.00726792
2435	2	DUNTIL	44a	500000	0
2436	2	DUNTIL	44a	400000	0.00741265
2437	2	DUNTIL	44a	300000	0.00737913
2438	2	DUNTIL	44a	200000	0.00482817
2439	2	DUNTIL	44a	100000	0
2440	2	DUNTIL	44a	0	0.00403097
2441	2	DUNTIL	212	0	0.00390497
2442	2	DUNTIL	212	100000	0
2443	2	DUNTIL	212	200000	0.00245449
2444	2	DUNTIL	212	300000	0
2445	2	DUNTIL	212	400000	0
2446	2	DUNTIL	249	0	0.00770791
2447	2	DUNTIL	249	100000	0.00603959
2448	2	DUNTIL	249	200000	0.0160271
2449	2	DUNTIL	81	0	0
2450	2	DUNTIL	81	100000	0
2451	2	DUNTIL	81	200000	0
2452	2	DUNTIL	81	300000	0.00495626
2453	2	DUNTIL	81	400000	0
2454	2	DUNTIL	81	500000	0.00494146
2455	2	DUNTIL	81	700000	0
2456	2	DUNTIL	81	800000	0
2457	2	DUNTIL	81	900000	0.00664796
2458	2	DUNTIL	19	1500000	0
2459	2	DUNTIL	19	1300000	0
2460	2	DUNTIL	19	1200000	0.00195894
2461	2	DUNTIL	19	800000	0.00170533
2462	2	DUNTIL	19	600000	0
2463	2	DUNTIL	19	400000	0
2464	2	DUNTIL	19	300000	0
2465	2	DUNTIL	19	200000	0.00459126
2466	2	DUNTIL	19	100000	0
2467	2	DUNTIL	112	800000	0
2468	2	DUNTIL	112	600000	0
2469	2	DUNTIL	112	400000	0.0190446
2470	2	DUNTIL	112	200000	0.00316733
2471	2	DUNTIL	112	100000	0.0101158
2472	2	DUNTIL	216	300000	0
2473	2	DUNTIL	73	400000	0.0117402
2474	2	DUNTIL	73	500000	0.0104986
2475	2	DUNTIL	73	600000	0
2476	2	DUNTIL	73	800000	0
2477	2	DUNTIL	73	1200000	0.00511128
2478	2	DUNTIL	65	0	0
2479	2	DUNTIL	65	300000	0.00248569
2480	2	DUNTIL	65	500000	0
2481	2	DUNTIL	65	600000	0
2482	2	DUNTIL	65	900000	0
2483	2	DUNTIL	65	1000000	0.00238396
2484	2	DUNTIL	65	1100000	0.00757569
2485	2	DUNTIL	42	300000	0
2486	2	DUNTIL	42	400000	0.000547607
2487	2	DUNTIL	42	600000	0.00386853
2488	2	DUNTIL	42	800000	0.00741194
2489	2	DUNTIL	42	1000000	0.00166513
2490	2	DUNTIL	42	1100000	0.00167041
2491	2	DUNTIL	42	1200000	0.00249799
2492	2	DUNTIL	42	1400000	0.00494213
2493	2	DUNTIL	42	1500000	0
2494	2	DUNTIL	42	1600000	0
2495	2	DUNTIL	173	500000	0.00478418
2496	2	DUNTIL	173	400000	0.00273702
2497	2	DUNTIL	173	300000	0.000928894
2498	2	DUNTIL	173	200000	0
2499	2	DUNTIL	173	100000	0
2500	2	DUNTIL	173	0	0.0126408
2501	2	DUNTIL	41a	0	0.0104409
2502	2	DUNTIL	41a	100000	0
2503	2	DUNTIL	41a	200000	0.00358175
2504	2	DUNTIL	41a	300000	0.0124534
2505	2	DUNTIL	41a	400000	0
2506	2	DUNTIL	41a	500000	0.00986054
2507	2	DUNTIL	41a	600000	0
2508	2	DUNTIL	41a	700000	0.00237516
2509	2	DUNTIL	41a	800000	0.00946967
2510	2	DUNTIL	41a	900000	0
2511	2	DUNTIL	41a	1000000	0
2512	2	DUNTIL	41a	1100000	0.00716789
2513	2	DUNTIL	41a	1200000	0.0180608
2514	2	DUNTIL	41a	1400000	0.00234837
2515	2	DUNTIL	41a	1500000	0.0140275
2516	2	DUNTIL	429	0	0
2517	2	DUNTIL	151	0	0
2518	2	DUNTIL	151	100000	0.00946742
2519	2	DUNTIL	151	200000	0.0112636
2520	2	DUNTIL	151	300000	0
2521	2	DUNTIL	151	400000	0.0197852
2522	2	DUNTIL	151	500000	0
2523	2	DUNTIL	151	600000	0
2524	2	DUNTIL	27	0	0.00864798
2525	2	DUNTIL	27	100000	0.00536922
2526	2	DUNTIL	27	200000	0.0140973
2527	2	DUNTIL	27	300000	0.00427868
2528	2	DUNTIL	27	400000	0.00996386
2529	2	DUNTIL	27	500000	0.00853043
2530	2	DUNTIL	27	600000	0.00429883
2531	2	DUNTIL	27	700000	0.0156608
2532	2	DUNTIL	27	800000	0.00689111
2533	2	DUNTIL	27	900000	0.00558398
2534	2	DUNTIL	27	1000000	0.00775302
2535	2	DUNTIL	27	1100000	0.0164067
2536	2	DUNTIL	27	1200000	0.00332864
2537	2	DUNTIL	27	1300000	0.00718985
2538	2	DUNTIL	27	1400000	0.0274692
2539	2	DUNTIL	27	1500000	0.0172478
2540	2	DUNTIL	27	1600000	0.0237667
2541	2	DUNTIL	27	1700000	0.0110052
2542	2	DUNTIL	27	1800000	0.00542435
2543	2	DUNTIL	27	1900000	0
2544	2	DUNTIL	27	2000000	-3766.96
4310	2	IMPR_rils	18	2200000	0
4311	2	IMPR_rils	18	2100000	0.0345305
4312	2	IMPR_rils	18	2000000	0.00224653
4313	2	IMPR_rils	18	1900000	0.00852563
4314	2	IMPR_rils	18	1800000	0.0247776
4315	2	IMPR_rils	18	1700000	0
4316	2	IMPR_rils	18	1600000	0.0255343
4317	2	IMPR_rils	18	1500000	0
4318	2	IMPR_rils	18	1400000	0.00752884
4319	2	IMPR_rils	18	1300000	0.0307791
4320	2	IMPR_rils	18	1200000	0
4321	2	IMPR_rils	18	1100000	0.00850193
4322	2	IMPR_rils	18	1000000	0
4323	2	IMPR_rils	18	900000	0.0127572
4324	2	IMPR_rils	18	800000	0
4325	2	IMPR_rils	18	700000	0
4326	2	IMPR_rils	18	600000	0.0169723
4327	2	IMPR_rils	18	500000	0.0173153
4328	2	IMPR_rils	18	400000	0.0166651
4329	2	IMPR_rils	18	300000	0.0171948
4330	2	IMPR_rils	18	200000	0.00787946
4331	2	IMPR_rils	18	100000	0
4332	2	IMPR_rils	18	0	0
4333	2	IMPR_rils	697	0	0.0245743
4334	2	IMPR_rils	89	0	0.0167048
4335	2	IMPR_rils	89	100000	0.0111447
4336	2	IMPR_rils	89	200000	0
4337	2	IMPR_rils	89	300000	0.00812396
4338	2	IMPR_rils	89	400000	0.0113839
4339	2	IMPR_rils	89	500000	0.0210012
4340	2	IMPR_rils	89	600000	0
4341	2	IMPR_rils	89	700000	0.0167507
4342	2	IMPR_rils	89	800000	0
4343	2	IMPR_rils	89	900000	0.0167447
4344	2	IMPR_rils	89	1000000	0
4345	2	IMPR_rils	44a	700000	0
4346	2	IMPR_rils	44a	600000	0.0139741
4347	2	IMPR_rils	44a	500000	0.0144097
4348	2	IMPR_rils	44a	400000	0.00863965
4349	2	IMPR_rils	44a	300000	0.0103158
4350	2	IMPR_rils	44a	200000	0
4351	2	IMPR_rils	44a	100000	0
4352	2	IMPR_rils	44a	0	0
4353	2	IMPR_rils	212	0	0.0208308
4354	2	IMPR_rils	212	100000	0
4355	2	IMPR_rils	212	200000	0.0209845
4356	2	IMPR_rils	212	300000	0
4357	2	IMPR_rils	212	400000	0.0181871
4358	2	IMPR_rils	249	0	0.0205805
4359	2	IMPR_rils	249	100000	0
4360	2	IMPR_rils	249	200000	0.0130598
4361	2	IMPR_rils	81	0	0
4362	2	IMPR_rils	81	100000	0
4363	2	IMPR_rils	81	200000	0.0338309
4364	2	IMPR_rils	81	300000	0.0126786
4365	2	IMPR_rils	81	400000	0
4366	2	IMPR_rils	81	500000	0
4367	2	IMPR_rils	81	700000	0.00423558
4368	2	IMPR_rils	81	800000	0.00378314
4369	2	IMPR_rils	81	900000	0
4370	2	IMPR_rils	81	1000000	0
4371	2	IMPR_rils	112	0	0
4372	2	IMPR_rils	112	100000	0
4373	2	IMPR_rils	112	200000	0.00196893
4374	2	IMPR_rils	112	300000	0.00201458
4375	2	IMPR_rils	112	400000	0
4376	2	IMPR_rils	112	500000	0
4377	2	IMPR_rils	112	600000	0
4378	2	IMPR_rils	112	800000	0
4379	2	IMPR_rils	216	300000	0.00934558
4380	2	IMPR_rils	19	0	0.0116314
4381	2	IMPR_rils	19	100000	0
4382	2	IMPR_rils	19	200000	0
4383	2	IMPR_rils	19	300000	0
4384	2	IMPR_rils	19	400000	0.00868253
4385	2	IMPR_rils	19	600000	0
4386	2	IMPR_rils	19	800000	0
4387	2	IMPR_rils	19	1000000	0
4388	2	IMPR_rils	19	1100000	0
4389	2	IMPR_rils	19	1200000	0.00434826
4390	2	IMPR_rils	19	1300000	0
4391	2	IMPR_rils	19	1400000	0.0227775
4392	2	IMPR_rils	19	1500000	0
4393	2	IMPR_rils	73	600000	0
4394	2	IMPR_rils	73	700000	0
4395	2	IMPR_rils	73	800000	0
4396	2	IMPR_rils	73	900000	0
4397	2	IMPR_rils	73	1000000	0
4398	2	IMPR_rils	73	1100000	0
4399	2	IMPR_rils	73	1200000	0
4400	2	IMPR_rils	65	0	0
4401	2	IMPR_rils	65	300000	0
4402	2	IMPR_rils	65	500000	0
4403	2	IMPR_rils	65	600000	0.0175446
4404	2	IMPR_rils	65	700000	0
4405	2	IMPR_rils	65	800000	0.00878115
4406	2	IMPR_rils	65	1000000	0
4407	2	IMPR_rils	65	1100000	0.022578
4408	2	IMPR_rils	42	200000	0.0150902
4409	2	IMPR_rils	42	300000	0
4410	2	IMPR_rils	42	400000	0
4411	2	IMPR_rils	42	600000	0.00973981
4412	2	IMPR_rils	42	700000	0
4413	2	IMPR_rils	42	800000	0.028347
4414	2	IMPR_rils	42	900000	0
4415	2	IMPR_rils	42	1000000	0.00839599
4416	2	IMPR_rils	42	1200000	0.0079466
4417	2	IMPR_rils	42	1400000	0
4418	2	IMPR_rils	42	1500000	0
4419	2	IMPR_rils	42	1600000	0
4420	2	IMPR_rils	173	500000	0
4421	2	IMPR_rils	173	400000	0.0105699
4422	2	IMPR_rils	173	300000	0
4423	2	IMPR_rils	173	200000	0.00563059
4424	2	IMPR_rils	173	100000	0
4425	2	IMPR_rils	173	0	0.0119324
4426	2	IMPR_rils	41a	0	0.0159771
4427	2	IMPR_rils	41a	100000	0.00320592
4428	2	IMPR_rils	41a	200000	0.00439625
4429	2	IMPR_rils	41a	300000	0
4430	2	IMPR_rils	41a	400000	0.00538584
4431	2	IMPR_rils	41a	500000	0.00982372
4432	2	IMPR_rils	41a	600000	0
4433	2	IMPR_rils	41a	700000	0.00427635
4434	2	IMPR_rils	41a	800000	0
4435	2	IMPR_rils	41a	900000	0.00855597
4436	2	IMPR_rils	41a	1000000	0
4437	2	IMPR_rils	41a	1100000	0
4438	2	IMPR_rils	41a	1200000	0.0435988
4439	2	IMPR_rils	41a	1300000	0
4440	2	IMPR_rils	41a	1400000	0.00854329
4441	2	IMPR_rils	41a	1500000	0
4442	2	IMPR_rils	429	0	0.00250385
4443	2	IMPR_rils	151	0	0.0112432
4444	2	IMPR_rils	151	100000	0
4445	2	IMPR_rils	151	200000	0.01705
4446	2	IMPR_rils	151	300000	0
4447	2	IMPR_rils	151	400000	0.0167073
4448	2	IMPR_rils	151	500000	0
4449	2	IMPR_rils	151	600000	0.0149768
4450	2	IMPR_rils	27	0	0.00652824
4451	2	IMPR_rils	27	100000	0.000895933
4452	2	IMPR_rils	27	200000	0.00972484
4453	2	IMPR_rils	27	300000	0.024686
4454	2	IMPR_rils	27	400000	0.00642177
4455	2	IMPR_rils	27	500000	0.00617732
4456	2	IMPR_rils	27	600000	0.00956125
4457	2	IMPR_rils	27	700000	0
4458	2	IMPR_rils	27	800000	0.0204572
4459	2	IMPR_rils	27	900000	0
4460	2	IMPR_rils	27	1000000	0
4461	2	IMPR_rils	27	1100000	0.0239464
4462	2	IMPR_rils	27	1200000	0
4463	2	IMPR_rils	27	1300000	0.00730945
4464	2	IMPR_rils	27	1400000	0.0356276
4465	2	IMPR_rils	27	1500000	0.00187499
4466	2	IMPR_rils	27	1600000	0.0182292
4467	2	IMPR_rils	27	1700000	0.0129215
4468	2	IMPR_rils	27	1800000	0
4469	2	IMPR_rils	27	1900000	0
4470	2	IMPR_rils	27	2000000	-1520.61
6241	2	IMNAS	18	2200000	0
6242	2	IMNAS	18	2100000	0.00332725
6243	2	IMNAS	18	2000000	0.0097904
6244	2	IMNAS	18	1900000	0.022098
6245	2	IMNAS	18	1800000	0.0317074
6246	2	IMNAS	18	1700000	0.00619865
6247	2	IMNAS	18	1600000	0.0329039
6248	2	IMNAS	18	1500000	0
6249	2	IMNAS	18	1400000	0.01397
6250	2	IMNAS	18	1300000	0.01468
6251	2	IMNAS	18	1200000	0
6252	2	IMNAS	18	1100000	0.0272878
6253	2	IMNAS	18	1000000	0.0278897
6254	2	IMNAS	18	900000	0.0137196
6255	2	IMNAS	18	800000	0.0197031
6256	2	IMNAS	18	700000	0
6257	2	IMNAS	18	600000	0.00836333
6258	2	IMNAS	18	500000	0.00956802
6259	2	IMNAS	18	400000	0.0188276
6260	2	IMNAS	18	300000	0
6261	2	IMNAS	18	200000	0.0324999
6262	2	IMNAS	18	100000	0.0216771
6263	2	IMNAS	18	0	0
6264	2	IMNAS	697	0	0
6265	2	IMNAS	89	0	0
6266	2	IMNAS	89	100000	0.00623565
6267	2	IMNAS	89	200000	0
6268	2	IMNAS	89	300000	0.0694973
6269	2	IMNAS	89	400000	0.0708182
6270	2	IMNAS	89	500000	0.0320236
6271	2	IMNAS	89	600000	0
6272	2	IMNAS	89	700000	0.0315224
6273	2	IMNAS	89	800000	0
6274	2	IMNAS	89	900000	0
6275	2	IMNAS	89	1000000	0.00764571
6276	2	IMNAS	44a	700000	0.00542203
6277	2	IMNAS	44a	600000	0.00768432
6278	2	IMNAS	44a	500000	0.0151332
6279	2	IMNAS	44a	400000	0
6280	2	IMNAS	44a	300000	0
6281	2	IMNAS	44a	200000	0.0053066
6282	2	IMNAS	44a	0	0
6283	2	IMNAS	212	0	0
6284	2	IMNAS	212	100000	0
6285	2	IMNAS	212	200000	0.0108615
6286	2	IMNAS	212	300000	0
6287	2	IMNAS	212	400000	0
6288	2	IMNAS	249	0	0.0173005
6289	2	IMNAS	249	100000	0
6290	2	IMNAS	249	200000	0
6291	2	IMNAS	81	0	0
6292	2	IMNAS	81	100000	0
6293	2	IMNAS	81	200000	0.011265
6294	2	IMNAS	81	300000	0
6295	2	IMNAS	81	400000	0
6296	2	IMNAS	81	500000	0
6297	2	IMNAS	81	700000	0
6298	2	IMNAS	81	800000	0
6299	2	IMNAS	81	900000	0
6300	2	IMNAS	216	300000	0.011223
6301	2	IMNAS	112	800000	0
6302	2	IMNAS	112	400000	0
6303	2	IMNAS	112	200000	0
6304	2	IMNAS	112	100000	0
6305	2	IMNAS	19	200000	0
6306	2	IMNAS	19	300000	0.0113534
6307	2	IMNAS	19	400000	0
6308	2	IMNAS	19	600000	0
6309	2	IMNAS	19	800000	0
6310	2	IMNAS	19	1000000	0
6311	2	IMNAS	19	1100000	0
6312	2	IMNAS	19	1200000	0
6313	2	IMNAS	19	1300000	0
6314	2	IMNAS	19	1500000	0
6315	2	IMNAS	73	1100000	0.00552921
6316	2	IMNAS	73	800000	0
6317	2	IMNAS	73	700000	0
6318	2	IMNAS	65	0	0
6319	2	IMNAS	65	300000	0.013459
6320	2	IMNAS	65	500000	0.0185737
6321	2	IMNAS	65	600000	0.0113506
6322	2	IMNAS	65	1000000	0
6323	2	IMNAS	65	1100000	0
6324	2	IMNAS	65	1200000	0.00579868
6325	2	IMNAS	42	100000	0
6326	2	IMNAS	42	300000	0.0101758
6327	2	IMNAS	42	400000	0.0104101
6328	2	IMNAS	42	800000	0
6329	2	IMNAS	42	1000000	0.00602972
6330	2	IMNAS	42	1200000	0
6331	2	IMNAS	42	1400000	0
6332	2	IMNAS	42	1500000	0.0138186
6333	2	IMNAS	42	1600000	0
6334	2	IMNAS	173	400000	0
6335	2	IMNAS	173	300000	0
6336	2	IMNAS	173	200000	0
6337	2	IMNAS	173	100000	0.0128445
6338	2	IMNAS	41a	0	0.0126451
6339	2	IMNAS	41a	200000	0
6340	2	IMNAS	41a	300000	0
6341	2	IMNAS	41a	400000	0.0191202
6342	2	IMNAS	41a	500000	0
6343	2	IMNAS	41a	600000	0
6344	2	IMNAS	41a	700000	0.0133396
6345	2	IMNAS	41a	800000	0
6346	2	IMNAS	41a	900000	0
6347	2	IMNAS	41a	1000000	0
6348	2	IMNAS	41a	1100000	0.0166693
6349	2	IMNAS	41a	1200000	0.0254711
6350	2	IMNAS	41a	1400000	0.0237152
6351	2	IMNAS	41a	1500000	0.0230491
6352	2	IMNAS	429	0	0
6353	2	IMNAS	151	0	0
6354	2	IMNAS	151	100000	0
6355	2	IMNAS	151	200000	0.00758081
6356	2	IMNAS	151	300000	0
6357	2	IMNAS	151	400000	0
6358	2	IMNAS	151	500000	0.0141651
6359	2	IMNAS	151	600000	0
6360	2	IMNAS	27	0	0
6361	2	IMNAS	27	100000	0
6362	2	IMNAS	27	200000	0
6363	2	IMNAS	27	300000	0.016414
6364	2	IMNAS	27	400000	0.0166618
6365	2	IMNAS	27	500000	0
6366	2	IMNAS	27	600000	0.0159038
6367	2	IMNAS	27	700000	0
6368	2	IMNAS	27	800000	0.021492
6369	2	IMNAS	27	900000	0.0261155
6370	2	IMNAS	27	1000000	0.00459315
6371	2	IMNAS	27	1100000	0.00787324
6372	2	IMNAS	27	1200000	0.0126623
6373	2	IMNAS	27	1300000	0
6374	2	IMNAS	27	1400000	0.0297673
6375	2	IMNAS	27	1500000	0.0290046
6376	2	IMNAS	27	1600000	0
6377	2	IMNAS	27	1700000	0.0110436
6378	2	IMNAS	27	1800000	0.0184296
6379	2	IMNAS	27	1900000	0
6380	2	IMNAS	27	2000000	-1623.17
8048	2	IMSWC	18	2200000	0.0212194
8049	2	IMSWC	18	2100000	0.00128133
8050	2	IMSWC	18	2000000	0.00174345
8051	2	IMSWC	18	1900000	0.00803664
8052	2	IMSWC	18	1800000	0.0229883
8053	2	IMSWC	18	1700000	0.00444397
8054	2	IMSWC	18	1600000	0.00411748
8055	2	IMSWC	18	1500000	0.00863571
8056	2	IMSWC	18	1400000	0.000773746
8057	2	IMSWC	18	1300000	0.0119053
8058	2	IMSWC	18	1200000	0.00484
8059	2	IMSWC	18	1100000	0.00129356
8060	2	IMSWC	18	1000000	0.00685982
8061	2	IMSWC	18	900000	0.00609255
8062	2	IMSWC	18	800000	0.00456523
8063	2	IMSWC	18	700000	0.00615209
8064	2	IMSWC	18	600000	0.00446562
8065	2	IMSWC	18	500000	0.00422372
8066	2	IMSWC	18	400000	0.0103431
8067	2	IMSWC	18	300000	0.0140025
8068	2	IMSWC	18	200000	0.00851996
8069	2	IMSWC	18	100000	0.0041354
8070	2	IMSWC	18	0	0.00510162
8071	2	IMSWC	89	0	0
8072	2	IMSWC	89	100000	0.0119171
8073	2	IMSWC	89	200000	0.00204911
8074	2	IMSWC	89	300000	0.0144492
8075	2	IMSWC	89	400000	0.00135748
8076	2	IMSWC	89	500000	0.00773281
8077	2	IMSWC	89	600000	0.00665292
8078	2	IMSWC	89	700000	0.0107814
8079	2	IMSWC	89	800000	0.00460005
8080	2	IMSWC	89	900000	0.00946993
8081	2	IMSWC	89	1000000	0
8082	2	IMSWC	44a	700000	0.00777623
8083	2	IMSWC	44a	600000	0.002596
8084	2	IMSWC	44a	500000	0.00489425
8085	2	IMSWC	44a	400000	0.00125415
8086	2	IMSWC	44a	300000	0.00525136
8087	2	IMSWC	44a	200000	0.00311924
8088	2	IMSWC	44a	100000	0
8089	2	IMSWC	212	0	0.00799102
8090	2	IMSWC	212	100000	0.013529
8091	2	IMSWC	212	200000	2.37184e-05
8092	2	IMSWC	212	300000	2.0867e-05
8093	2	IMSWC	212	400000	0.00374903
8094	2	IMSWC	249	0	0.00250845
8095	2	IMSWC	249	100000	0.000866705
8096	2	IMSWC	249	200000	0.00108429
8097	2	IMSWC	81	0	0
8098	2	IMSWC	81	100000	0.00512494
8099	2	IMSWC	81	200000	0.00215083
8100	2	IMSWC	81	300000	0.000651654
8101	2	IMSWC	81	400000	0
8102	2	IMSWC	81	500000	0.00275648
8103	2	IMSWC	81	700000	0.00522122
8104	2	IMSWC	81	800000	0.00203562
8105	2	IMSWC	81	900000	0
8106	2	IMSWC	112	0	0
8107	2	IMSWC	112	100000	0.00159791
8108	2	IMSWC	112	200000	0
8109	2	IMSWC	112	400000	0.00251563
8110	2	IMSWC	112	500000	0
8111	2	IMSWC	112	600000	0.00136623
8112	2	IMSWC	112	800000	0.00820642
8113	2	IMSWC	216	200000	0.00335355
8114	2	IMSWC	216	300000	0
8115	2	IMSWC	19	100000	0.00629237
8116	2	IMSWC	19	200000	0
8117	2	IMSWC	19	300000	0.00325374
8118	2	IMSWC	19	400000	0.00323092
8119	2	IMSWC	19	600000	0
8120	2	IMSWC	19	700000	0
8121	2	IMSWC	19	800000	0.00605465
8122	2	IMSWC	19	1000000	0
8123	2	IMSWC	19	1100000	0
8124	2	IMSWC	19	1200000	0.00039513
8125	2	IMSWC	19	1300000	0
8126	2	IMSWC	19	1400000	0
8127	2	IMSWC	73	600000	0.00217274
8128	2	IMSWC	73	700000	0
8129	2	IMSWC	73	800000	0
8130	2	IMSWC	73	1100000	0.00199108
8131	2	IMSWC	73	1200000	0
8132	2	IMSWC	65	500000	0
8133	2	IMSWC	65	600000	0.00172746
8134	2	IMSWC	65	700000	0
8135	2	IMSWC	65	1000000	0.00203005
8136	2	IMSWC	65	1100000	0
8137	2	IMSWC	42	100000	0
8138	2	IMSWC	42	200000	0.00160273
8139	2	IMSWC	42	300000	0.00624475
8140	2	IMSWC	42	400000	0.00312179
8141	2	IMSWC	42	600000	0.00934645
8142	2	IMSWC	42	1000000	0.0139252
8143	2	IMSWC	42	1400000	0
8144	2	IMSWC	42	1500000	0.0186043
8145	2	IMSWC	173	500000	0
8146	2	IMSWC	173	400000	0.0101887
8147	2	IMSWC	173	300000	0.00221615
8148	2	IMSWC	173	200000	0.01081
8149	2	IMSWC	173	100000	0.00982448
8150	2	IMSWC	173	0	0.00617003
8151	2	IMSWC	41a	0	0.00962741
8152	2	IMSWC	41a	100000	0.0114122
8153	2	IMSWC	41a	200000	0.0115797
8154	2	IMSWC	41a	300000	0.0178764
8155	2	IMSWC	41a	500000	0
8156	2	IMSWC	41a	600000	0.00567513
8157	2	IMSWC	41a	700000	0
8158	2	IMSWC	41a	800000	0.0047118
8159	2	IMSWC	41a	900000	0.00592886
8160	2	IMSWC	41a	1000000	0.00641245
8161	2	IMSWC	41a	1100000	0.00329525
8162	2	IMSWC	41a	1200000	0.00336263
8163	2	IMSWC	41a	1300000	0.0061445
8164	2	IMSWC	41a	1400000	0.0076573
8165	2	IMSWC	41a	1500000	0.00397455
8166	2	IMSWC	429	0	0.00684756
8167	2	IMSWC	151	0	0.0020007
8168	2	IMSWC	151	100000	0.00901025
8169	2	IMSWC	151	200000	0.018529
8170	2	IMSWC	151	300000	0.0200522
8171	2	IMSWC	151	500000	0.0107113
8172	2	IMSWC	151	600000	0
8173	2	IMSWC	27	0	0.0120893
8174	2	IMSWC	27	100000	0.010782
8175	2	IMSWC	27	200000	0.0123813
8176	2	IMSWC	27	300000	0.0105953
8177	2	IMSWC	27	400000	0.0100795
8178	2	IMSWC	27	500000	0.00357511
8179	2	IMSWC	27	600000	0.00544528
8180	2	IMSWC	27	700000	0.00809147
8181	2	IMSWC	27	800000	0.0178873
8182	2	IMSWC	27	900000	0.00288838
8183	2	IMSWC	27	1000000	0.012087
8184	2	IMSWC	27	1100000	0.00797531
8185	2	IMSWC	27	1200000	0.0140644
8186	2	IMSWC	27	1300000	0.0164192
8187	2	IMSWC	27	1400000	0.000914746
8188	2	IMSWC	27	1500000	0.00564792
8189	2	IMSWC	27	1600000	0.00639312
8190	2	IMSWC	27	1700000	0.00245876
8191	2	IMSWC	27	1800000	0
8192	2	IMSWC	27	1900000	0
8193	2	IMSWC	27	2000000	-17454.5
789	3	IMF3	316	100000	0.0283063
790	3	IMF3	316	0	0
791	3	IMF3	137	400000	0
792	3	IMF3	137	300000	0.00812983
793	3	IMF3	137	200000	0
794	3	IMF3	55a	200000	0.04038
795	3	IMF3	116	800000	0.00402426
796	3	IMF3	116	700000	0
797	3	IMF3	116	600000	0
798	3	IMF3	116	400000	0
799	3	IMF3	116	300000	0.0344297
800	3	IMF3	116	100000	0.0141689
801	3	IMF3	116	0	0.0355519
802	3	IMF3	62	1300000	0.0377511
803	3	IMF3	62	900000	0
804	3	IMF3	62	600000	0
805	3	IMF3	35	0	0.00763478
806	3	IMF3	35	400000	0.00246389
807	3	IMF3	23	1600000	0
808	3	IMF3	23	1200000	0.0198687
809	3	IMF3	23	900000	0
810	3	IMF3	23	800000	0
811	3	IMF3	23	700000	0
812	3	IMF3	23	600000	0
813	3	IMF3	23	300000	0
814	3	IMF3	23	200000	0.00789836
815	3	IMF3	265	0	0.00849165
816	3	IMF3	265	100000	0.016784
817	3	IMF3	265	200000	0.0124955
818	3	IMF3	70b	600000	0.0263815
819	3	IMF3	5a	1700000	0.0532409
820	3	IMF3	5a	1600000	0
821	3	IMF3	5a	1500000	0.0217977
822	3	IMF3	5a	1300000	0.070301
823	3	IMF3	5a	1200000	0.0237734
824	3	IMF3	5a	1100000	0.0568892
825	3	IMF3	5a	1000000	0.0670252
826	3	IMF3	5a	900000	0.0176844
827	3	IMF3	5a	700000	0.0253735
828	3	IMF3	5a	600000	0.013162
829	3	IMF3	5a	500000	0
830	3	IMF3	5a	400000	0.0584552
831	3	IMF3	5a	300000	0.00274469
832	3	IMF3	5a	200000	0.0162849
833	3	IMF3	5a	0	0.0410451
834	3	IMF3	106a	0	0.0684462
835	3	IMF3	106a	200000	0.0264155
836	3	IMF3	106a	300000	0.0378733
837	3	IMF3	106a	400000	0.021962
838	3	IMF3	106a	500000	0.011426
839	3	IMF3	106a	700000	0
840	3	IMF3	258	300000	0.00304723
841	3	IMF3	258	200000	0.0130437
842	3	IMF3	258	100000	0
843	3	IMF3	258	0	0.0197094
844	3	IMF3	169	500000	0.035011
845	3	IMF3	169	400000	0.0120684
846	3	IMF3	169	300000	0.0101475
847	3	IMF3	169	200000	0.0033886
848	3	IMF3	169	100000	0.0498874
849	3	IMF3	169	0	0.0128681
850	3	IMF3	98	1000000	0.00635917
851	3	IMF3	98	900000	0.00316983
852	3	IMF3	98	800000	0.0112679
853	3	IMF3	98	700000	0.0250927
854	3	IMF3	98	500000	0.00530848
855	3	IMF3	98	400000	0.00387447
856	3	IMF3	98	300000	0
857	3	IMF3	98	200000	0.0248085
858	3	IMF3	98	100000	0
859	3	IMF3	98	0	0
860	3	IMF3	261	0	0.0118303
861	3	IMF3	261	100000	0.0185595
862	3	IMF3	261	200000	0.00331456
863	3	IMF3	273a	0	0
864	3	IMF3	64	1300000	0.0126875
865	3	IMF3	64	1200000	0.0296689
866	3	IMF3	64	1100000	0.00238044
867	3	IMF3	64	1000000	0.00589807
868	3	IMF3	64	900000	0.0189918
869	3	IMF3	64	800000	0.00488864
870	3	IMF3	64	700000	0.00280799
871	3	IMF3	64	600000	0.0279982
872	3	IMF3	64	500000	0.0350925
873	3	IMF3	64	400000	0.00391504
874	3	IMF3	64	300000	0.0171036
875	3	IMF3	64	200000	0
876	3	IMF3	64	100000	0
877	3	IMF3	64	0	-3079.85
2545	3	DUNTIL	23	0	0.0591069
2546	3	DUNTIL	23	300000	0.116234
2547	3	DUNTIL	23	600000	0.0236804
2548	3	DUNTIL	23	900000	0.0432047
2549	3	DUNTIL	23	1000000	0
2550	3	DUNTIL	23	1100000	0.01162
2551	3	DUNTIL	23	1600000	0
2552	3	DUNTIL	23	1800000	0
2553	3	DUNTIL	23	1900000	0.0144348
2554	3	DUNTIL	23	2100000	0
2555	3	DUNTIL	72	0	0
2556	3	DUNTIL	72	100000	0.0131087
2557	3	DUNTIL	72	200000	0.00523538
2558	3	DUNTIL	116	0	0.0798984
2559	3	DUNTIL	116	100000	0
2560	3	DUNTIL	116	300000	0.0085972
2561	3	DUNTIL	116	400000	0
2562	3	DUNTIL	116	500000	0
2563	3	DUNTIL	116	600000	0
2564	3	DUNTIL	116	700000	0
2565	3	DUNTIL	62	1200000	0
2566	3	DUNTIL	246	200000	0.00489742
2567	3	DUNTIL	55a	300000	0
2568	3	DUNTIL	55a	200000	0
2569	3	DUNTIL	55a	100000	0
2570	3	DUNTIL	55a	0	0.0111014
2571	3	DUNTIL	316	100000	0
2572	3	DUNTIL	316	0	0.0111515
2573	3	DUNTIL	137	0	0
2574	3	DUNTIL	137	100000	0.00735874
2575	3	DUNTIL	137	200000	0.00241022
2576	3	DUNTIL	137	300000	0.00193431
2577	3	DUNTIL	137	400000	0.085614
2578	3	DUNTIL	70b	0	0.0247754
2579	3	DUNTIL	389	0	0.052582
2580	3	DUNTIL	35	900000	0.0213028
2581	3	DUNTIL	35	500000	0.0398333
2582	3	DUNTIL	35	0	0.0279883
2583	3	DUNTIL	265	200000	0.020571
2584	3	DUNTIL	265	100000	0.0192027
2585	3	DUNTIL	5a	1800000	0
2586	3	DUNTIL	5a	1700000	0.00405639
2587	3	DUNTIL	5a	1600000	0
2588	3	DUNTIL	5a	1500000	0.0101088
2589	3	DUNTIL	5a	1400000	0
2590	3	DUNTIL	5a	1300000	0
2591	3	DUNTIL	5a	1200000	0.00811801
2592	3	DUNTIL	5a	1100000	0
2593	3	DUNTIL	5a	1000000	0
2594	3	DUNTIL	5a	900000	0.0053271
2595	3	DUNTIL	5a	800000	0.00692848
2596	3	DUNTIL	5a	700000	0.00937084
2597	3	DUNTIL	5a	600000	0
2598	3	DUNTIL	5a	500000	0.00732601
2599	3	DUNTIL	5a	400000	0.00268353
2600	3	DUNTIL	5a	300000	0.00418019
2601	3	DUNTIL	5a	200000	0.0140012
2602	3	DUNTIL	106a	0	0.00482313
2603	3	DUNTIL	106a	200000	0.00486474
2604	3	DUNTIL	106a	300000	0
2605	3	DUNTIL	106a	400000	0
2606	3	DUNTIL	106a	500000	0.00262105
2607	3	DUNTIL	106a	600000	0.0108411
2608	3	DUNTIL	106a	700000	0.0121794
2609	3	DUNTIL	258	300000	0.00695821
2610	3	DUNTIL	258	200000	0.0069904
2611	3	DUNTIL	258	100000	0.00940348
2612	3	DUNTIL	258	0	0.00356096
2613	3	DUNTIL	169	500000	0.0025492
2614	3	DUNTIL	169	400000	0
2615	3	DUNTIL	169	300000	0.00312919
2616	3	DUNTIL	169	200000	0.0175483
2617	3	DUNTIL	169	100000	0.003807
2618	3	DUNTIL	169	0	0
2619	3	DUNTIL	98	1000000	0.00306801
2620	3	DUNTIL	98	900000	0.034192
2621	3	DUNTIL	98	800000	0.00615307
2622	3	DUNTIL	98	700000	0.0213283
2623	3	DUNTIL	98	600000	0
2624	3	DUNTIL	98	500000	0.0190153
2625	3	DUNTIL	98	400000	0.00933234
2626	3	DUNTIL	98	300000	0.00826494
2627	3	DUNTIL	98	200000	0.00917453
2628	3	DUNTIL	98	100000	0.00926259
2629	3	DUNTIL	98	0	0.0112574
2630	3	DUNTIL	261	0	0.0129896
2631	3	DUNTIL	261	100000	0.00854815
2632	3	DUNTIL	261	200000	0.00564302
2633	3	DUNTIL	273a	0	0.00768665
2634	3	DUNTIL	64	1300000	0.0313809
2635	3	DUNTIL	64	1200000	0.00871885
2636	3	DUNTIL	64	1100000	0.00788833
2637	3	DUNTIL	64	1000000	0.0126586
2638	3	DUNTIL	64	900000	0.00425329
2639	3	DUNTIL	64	800000	0.0126642
2640	3	DUNTIL	64	700000	0.010841
2641	3	DUNTIL	64	600000	0.0162063
2642	3	DUNTIL	64	500000	0.0115474
2643	3	DUNTIL	64	400000	0.0287715
2644	3	DUNTIL	64	300000	0
2645	3	DUNTIL	64	200000	0.00808782
2646	3	DUNTIL	64	100000	0
2647	3	DUNTIL	64	0	-3265.8
4471	3	IMPR_rils	137	400000	0.0172339
4472	3	IMPR_rils	137	300000	0.00609987
4473	3	IMPR_rils	137	200000	0
4474	3	IMPR_rils	137	100000	0.0126732
4475	3	IMPR_rils	137	0	0.0190803
4476	3	IMPR_rils	316	100000	0
4477	3	IMPR_rils	316	0	0
4478	3	IMPR_rils	55a	300000	0.0119051
4479	3	IMPR_rils	55a	200000	0
4480	3	IMPR_rils	55a	100000	0.0137731
4481	3	IMPR_rils	116	800000	0.0038597
4482	3	IMPR_rils	116	700000	0.00965439
4483	3	IMPR_rils	116	600000	0.00562277
4484	3	IMPR_rils	116	500000	0
4485	3	IMPR_rils	116	400000	0.00616738
4486	3	IMPR_rils	116	300000	0
4487	3	IMPR_rils	116	200000	0.00616826
4488	3	IMPR_rils	116	100000	0.0164051
4489	3	IMPR_rils	116	0	0.0109311
4490	3	IMPR_rils	246	200000	0.00281774
4491	3	IMPR_rils	246	100000	0.00265491
4492	3	IMPR_rils	246	0	0
4493	3	IMPR_rils	62	1200000	0
4494	3	IMPR_rils	62	1000000	0
4495	3	IMPR_rils	62	800000	0
4496	3	IMPR_rils	62	700000	0
4497	3	IMPR_rils	62	600000	0.0162094
4498	3	IMPR_rils	62	500000	0
4499	3	IMPR_rils	70b	300000	0
4500	3	IMPR_rils	70b	200000	0.0102909
4501	3	IMPR_rils	70b	0	0.00708482
4502	3	IMPR_rils	389	0	0.00583956
4503	3	IMPR_rils	35	0	0.00590227
4504	3	IMPR_rils	35	100000	0.00617723
4505	3	IMPR_rils	35	400000	0
4506	3	IMPR_rils	35	600000	0
4507	3	IMPR_rils	35	800000	0.00458862
4508	3	IMPR_rils	35	900000	0
4509	3	IMPR_rils	35	1100000	0
4510	3	IMPR_rils	35	1400000	0
4511	3	IMPR_rils	72	300000	0
4512	3	IMPR_rils	72	200000	0.00204229
4513	3	IMPR_rils	72	100000	0.00210935
4514	3	IMPR_rils	72	0	0
4515	3	IMPR_rils	23	2100000	0
4516	3	IMPR_rils	23	2000000	0.0138209
4517	3	IMPR_rils	23	1900000	0
4518	3	IMPR_rils	23	1700000	0
4519	3	IMPR_rils	23	1600000	0.0187233
4520	3	IMPR_rils	23	1500000	0
4521	3	IMPR_rils	23	1300000	0
4522	3	IMPR_rils	23	1200000	0
4523	3	IMPR_rils	23	1100000	0
4524	3	IMPR_rils	23	1000000	0
4525	3	IMPR_rils	23	900000	0
4526	3	IMPR_rils	23	800000	0.0140473
4527	3	IMPR_rils	23	700000	0
4528	3	IMPR_rils	23	600000	0.00852497
4529	3	IMPR_rils	23	500000	0
4530	3	IMPR_rils	23	400000	0
4531	3	IMPR_rils	23	100000	0.00639928
4532	3	IMPR_rils	265	200000	0
4533	3	IMPR_rils	265	100000	0.00639716
4534	3	IMPR_rils	5a	1900000	0
4535	3	IMPR_rils	5a	1800000	0.00446191
4536	3	IMPR_rils	5a	1700000	0
4537	3	IMPR_rils	5a	1600000	0
4538	3	IMPR_rils	5a	1500000	0
4539	3	IMPR_rils	5a	1400000	0
4540	3	IMPR_rils	5a	1300000	0.00949059
4541	3	IMPR_rils	5a	1200000	0.0157442
4542	3	IMPR_rils	5a	1100000	0.012988
4543	3	IMPR_rils	5a	1000000	0
4544	3	IMPR_rils	5a	900000	0.0105215
4545	3	IMPR_rils	5a	800000	0
4546	3	IMPR_rils	5a	700000	0.0215946
4547	3	IMPR_rils	5a	600000	0
4548	3	IMPR_rils	5a	500000	0
4549	3	IMPR_rils	5a	400000	0.0198486
4550	3	IMPR_rils	5a	300000	0.0159774
4551	3	IMPR_rils	5a	200000	0.0214606
4552	3	IMPR_rils	106a	0	0.0202506
4553	3	IMPR_rils	106a	100000	0
4554	3	IMPR_rils	106a	200000	0
4555	3	IMPR_rils	106a	300000	0.0268291
4556	3	IMPR_rils	106a	400000	0
4557	3	IMPR_rils	106a	500000	0.019713
4558	3	IMPR_rils	106a	600000	0
4559	3	IMPR_rils	106a	700000	0
4560	3	IMPR_rils	258	300000	0.00734874
4561	3	IMPR_rils	258	200000	0.0123672
4562	3	IMPR_rils	258	100000	0.00979738
4563	3	IMPR_rils	258	0	0
4564	3	IMPR_rils	169	500000	0
4565	3	IMPR_rils	169	400000	0.0197285
4566	3	IMPR_rils	169	300000	0.0172377
4567	3	IMPR_rils	169	200000	0.0110089
4568	3	IMPR_rils	169	100000	0.0147845
4569	3	IMPR_rils	169	0	0.0283725
4570	3	IMPR_rils	98	900000	0
4571	3	IMPR_rils	98	800000	0.0186875
4572	3	IMPR_rils	98	700000	0
4573	3	IMPR_rils	98	600000	0
4574	3	IMPR_rils	98	500000	0
4575	3	IMPR_rils	98	400000	0.0356507
4576	3	IMPR_rils	98	300000	0.00671982
4577	3	IMPR_rils	98	200000	0
4578	3	IMPR_rils	98	100000	0
4579	3	IMPR_rils	98	0	0.0259096
4580	3	IMPR_rils	261	0	0.00589347
4581	3	IMPR_rils	261	100000	0
4582	3	IMPR_rils	261	200000	0.0158477
4583	3	IMPR_rils	273a	0	0.0532955
4584	3	IMPR_rils	64	1100000	0
4585	3	IMPR_rils	64	1000000	0.0186252
4586	3	IMPR_rils	64	900000	0.0275137
4587	3	IMPR_rils	64	700000	0.0274451
4588	3	IMPR_rils	64	600000	0.020357
4589	3	IMPR_rils	64	500000	0
4590	3	IMPR_rils	64	400000	0.00850675
4591	3	IMPR_rils	64	300000	0
4592	3	IMPR_rils	64	200000	0
4593	3	IMPR_rils	64	100000	0
4594	3	IMPR_rils	64	0	-1186.83
6381	3	IMNAS	137	400000	0
6382	3	IMNAS	137	300000	0.0382296
6383	3	IMNAS	137	200000	0.00581738
6384	3	IMNAS	137	100000	0.00570714
6385	3	IMNAS	137	0	0.0296409
6386	3	IMNAS	316	100000	0
6387	3	IMNAS	316	0	0.00595069
6388	3	IMNAS	55a	300000	0
6389	3	IMNAS	55a	200000	0.0189816
6390	3	IMNAS	55a	100000	0
6391	3	IMNAS	55a	0	0
6392	3	IMNAS	116	700000	0.00449654
6393	3	IMNAS	116	600000	0.0127513
6394	3	IMNAS	116	500000	0
6395	3	IMNAS	116	400000	0
6396	3	IMNAS	116	300000	0.00616272
6397	3	IMNAS	116	100000	0
6398	3	IMNAS	116	0	0
6399	3	IMNAS	246	200000	0
6400	3	IMNAS	62	1200000	0.00813858
6401	3	IMNAS	62	900000	0.00952584
6402	3	IMNAS	62	800000	0
6403	3	IMNAS	62	600000	0.0137912
6404	3	IMNAS	62	500000	0.0129706
6405	3	IMNAS	70b	0	0
6406	3	IMNAS	389	0	0.00524343
6407	3	IMNAS	35	0	0.00324336
6408	3	IMNAS	72	300000	0
6409	3	IMNAS	72	200000	0.00553227
6410	3	IMNAS	72	100000	0.00253998
6411	3	IMNAS	72	0	0
6412	3	IMNAS	23	1900000	0.00258009
6413	3	IMNAS	23	1600000	0
6414	3	IMNAS	23	1100000	0.0184662
6415	3	IMNAS	23	1000000	0
6416	3	IMNAS	23	900000	0
6417	3	IMNAS	23	800000	0.000722513
6418	3	IMNAS	23	700000	0.00543046
6419	3	IMNAS	23	600000	0.00917882
6420	3	IMNAS	23	0	0
6421	3	IMNAS	265	100000	0
6422	3	IMNAS	265	0	0.0130582
6423	3	IMNAS	5a	1800000	0
6424	3	IMNAS	5a	1700000	0
6425	3	IMNAS	5a	1600000	0.0133615
6426	3	IMNAS	5a	1500000	0.0058629
6427	3	IMNAS	5a	1400000	0
6428	3	IMNAS	5a	1300000	0.0230598
6429	3	IMNAS	5a	1100000	0
6430	3	IMNAS	5a	1000000	0
6431	3	IMNAS	5a	900000	0
6432	3	IMNAS	5a	800000	0
6433	3	IMNAS	5a	700000	0
6434	3	IMNAS	5a	600000	0
6435	3	IMNAS	5a	500000	0.0109791
6436	3	IMNAS	5a	400000	0.0171417
6437	3	IMNAS	5a	300000	0
6438	3	IMNAS	5a	200000	0
6439	3	IMNAS	106a	0	0.050481
6440	3	IMNAS	106a	100000	0
6441	3	IMNAS	106a	200000	0
6442	3	IMNAS	106a	300000	0.0338972
6443	3	IMNAS	106a	400000	0
6444	3	IMNAS	106a	500000	0.000157733
6445	3	IMNAS	106a	600000	0.00531737
6446	3	IMNAS	106a	700000	0.0189914
6447	3	IMNAS	258	200000	0
6448	3	IMNAS	258	100000	0.0305838
6449	3	IMNAS	258	0	0
6450	3	IMNAS	169	500000	0
6451	3	IMNAS	169	400000	0.00552362
6452	3	IMNAS	169	300000	0.0065943
6453	3	IMNAS	169	200000	0
6454	3	IMNAS	169	100000	0.015777
6455	3	IMNAS	169	0	0
6456	3	IMNAS	98	1000000	0.00858052
6457	3	IMNAS	98	900000	0.00654196
6458	3	IMNAS	98	800000	0.0274409
6459	3	IMNAS	98	700000	0.0167282
6460	3	IMNAS	98	600000	0
6461	3	IMNAS	98	500000	0.0195624
6462	3	IMNAS	98	400000	0.0290425
6463	3	IMNAS	98	300000	0.0312435
6464	3	IMNAS	98	200000	0.00117876
6465	3	IMNAS	98	100000	0.00843976
6466	3	IMNAS	98	0	0
6467	3	IMNAS	261	0	0.008279
6468	3	IMNAS	261	100000	0.0107964
6469	3	IMNAS	261	200000	0.0118683
6470	3	IMNAS	273a	0	0.00763684
6471	3	IMNAS	64	1300000	0
6472	3	IMNAS	64	1200000	0.0305098
6473	3	IMNAS	64	1100000	0
6474	3	IMNAS	64	1000000	0.0220074
6475	3	IMNAS	64	900000	0.00942663
6476	3	IMNAS	64	800000	0.0328005
6477	3	IMNAS	64	700000	0
6478	3	IMNAS	64	600000	0.0272764
6479	3	IMNAS	64	500000	0.0089415
6480	3	IMNAS	64	400000	0.0298179
6481	3	IMNAS	64	300000	0.00693399
6482	3	IMNAS	64	200000	0.0144709
6483	3	IMNAS	64	100000	0.00431202
6484	3	IMNAS	64	0	-1404.96
8194	3	IMSWC	35	1400000	0.0732726
8195	3	IMSWC	35	900000	0.0921373
8196	3	IMSWC	35	0	0.032181
8197	3	IMSWC	70b	0	0.0524762
8198	3	IMSWC	70b	300000	0.0465022
8199	3	IMSWC	70b	600000	0.00402373
8200	3	IMSWC	70b	700000	0.0180611
8201	3	IMSWC	62	500000	0.0074103
8202	3	IMSWC	62	600000	0.0283707
8203	3	IMSWC	62	900000	0
8204	3	IMSWC	62	1200000	0.014341
8205	3	IMSWC	137	400000	0
8206	3	IMSWC	137	300000	0
8207	3	IMSWC	137	200000	0.00418024
8208	3	IMSWC	137	100000	0
8209	3	IMSWC	137	0	0.00180848
8210	3	IMSWC	55a	300000	0.00921645
8211	3	IMSWC	55a	200000	0.00115657
8212	3	IMSWC	55a	100000	0
8213	3	IMSWC	316	100000	0
8214	3	IMSWC	316	0	0.00087828
8215	3	IMSWC	116	800000	0
8216	3	IMSWC	116	700000	0
8217	3	IMSWC	116	600000	0
8218	3	IMSWC	116	500000	0.00364097
8219	3	IMSWC	116	400000	0
8220	3	IMSWC	116	300000	0.00185814
8221	3	IMSWC	116	100000	0.005237
8222	3	IMSWC	116	0	0.00153361
8223	3	IMSWC	72	100000	0.000442751
8224	3	IMSWC	389	0	0.000617803
8225	3	IMSWC	23	2100000	0.00177947
8226	3	IMSWC	23	1900000	0.00299084
8227	3	IMSWC	23	1600000	0
8228	3	IMSWC	23	1200000	0
8229	3	IMSWC	23	1000000	0.0013649
8230	3	IMSWC	23	900000	0
8231	3	IMSWC	23	800000	0
8232	3	IMSWC	23	700000	0.00153674
8233	3	IMSWC	23	600000	0
8234	3	IMSWC	23	200000	0
8235	3	IMSWC	23	0	9.15077e-05
8236	3	IMSWC	265	200000	0.000848795
8237	3	IMSWC	265	100000	0
8238	3	IMSWC	265	0	0
8239	3	IMSWC	5a	1700000	0
8240	3	IMSWC	5a	1600000	0
8241	3	IMSWC	5a	1500000	0.0117376
8242	3	IMSWC	5a	1300000	0
8243	3	IMSWC	5a	1200000	0.0121891
8244	3	IMSWC	5a	1100000	0.00349333
8245	3	IMSWC	5a	1000000	0
8246	3	IMSWC	5a	900000	0.00494115
8247	3	IMSWC	5a	700000	0.00591937
8248	3	IMSWC	5a	600000	0.00264421
8249	3	IMSWC	5a	500000	0.0103189
8250	3	IMSWC	5a	400000	0.0106627
8251	3	IMSWC	5a	300000	0.00651932
8252	3	IMSWC	5a	200000	0.00892797
8253	3	IMSWC	106a	0	0.00653614
8254	3	IMSWC	106a	100000	0
8255	3	IMSWC	106a	200000	0.00691716
8256	3	IMSWC	106a	300000	0.00741649
8257	3	IMSWC	106a	400000	0
8258	3	IMSWC	106a	500000	0.0126348
8259	3	IMSWC	106a	600000	0.0117087
8260	3	IMSWC	106a	700000	0.0133106
8261	3	IMSWC	258	200000	0.0156068
8262	3	IMSWC	258	100000	0.00219799
8263	3	IMSWC	258	0	0.0110357
8264	3	IMSWC	169	500000	0.00417972
8265	3	IMSWC	169	400000	0.0170574
8266	3	IMSWC	169	300000	0.0192309
8267	3	IMSWC	169	200000	0.00916959
8268	3	IMSWC	169	100000	0.0100601
8269	3	IMSWC	169	0	0.00703736
8270	3	IMSWC	98	1000000	0.00564572
8271	3	IMSWC	98	900000	0.00702251
8272	3	IMSWC	98	800000	0.0115243
8273	3	IMSWC	98	700000	0.0149925
8274	3	IMSWC	98	500000	0.00568267
8275	3	IMSWC	98	400000	0.0101362
8276	3	IMSWC	98	300000	0.00706124
8277	3	IMSWC	98	200000	0.0142194
8278	3	IMSWC	98	100000	0.0235409
8279	3	IMSWC	261	0	0.000824038
8280	3	IMSWC	261	100000	0.0116355
8281	3	IMSWC	261	200000	0.00854022
8282	3	IMSWC	273a	0	0
8283	3	IMSWC	64	1300000	0.0247449
8284	3	IMSWC	64	1200000	0.0147099
8285	3	IMSWC	64	1100000	0.0236955
8286	3	IMSWC	64	1000000	0.0120395
8287	3	IMSWC	64	900000	0.00370776
8288	3	IMSWC	64	800000	0.0220205
8289	3	IMSWC	64	700000	0.0190292
8290	3	IMSWC	64	600000	0.0121301
8291	3	IMSWC	64	500000	0.0128786
8292	3	IMSWC	64	400000	0.0102955
8293	3	IMSWC	64	300000	0.00230782
8294	3	IMSWC	64	200000	0
8295	3	IMSWC	64	100000	0.0530233
8296	3	IMSWC	64	0	-12577.2
878	4	IMF3	1	4900000	0.101911
879	4	IMF3	1	4800000	0.000203537
880	4	IMF3	1	4600000	0
881	4	IMF3	1	4500000	0.00582003
882	4	IMF3	1	4400000	0.0133002
883	4	IMF3	1	4300000	0.0410801
884	4	IMF3	1	4200000	0
885	4	IMF3	1	4100000	0
886	4	IMF3	1	4000000	0.0477714
887	4	IMF3	1	3800000	0.00275596
888	4	IMF3	1	3700000	0
889	4	IMF3	1	3600000	0.00311561
890	4	IMF3	1	3500000	0.0252665
891	4	IMF3	1	3300000	0.0142048
892	4	IMF3	1	3200000	0
893	4	IMF3	1	3100000	0.00516019
894	4	IMF3	1	3000000	0.044568
895	4	IMF3	1	2900000	0.00309734
896	4	IMF3	1	2800000	0.00922568
897	4	IMF3	1	2700000	0.0269056
898	4	IMF3	1	2600000	0
899	4	IMF3	1	2500000	0.00862236
900	4	IMF3	1	2400000	0.0138717
901	4	IMF3	1	2300000	0.00189184
902	4	IMF3	1	2200000	0.00594108
903	4	IMF3	1	2100000	0
904	4	IMF3	1	1900000	0.00454619
905	4	IMF3	1	1800000	0.0302323
906	4	IMF3	1	1700000	0.00318672
907	4	IMF3	1	1600000	0.00298337
908	4	IMF3	1	1500000	0
909	4	IMF3	1	1400000	0.00552347
910	4	IMF3	1	1300000	0
911	4	IMF3	1	1200000	0
912	4	IMF3	1	1100000	0.0105059
913	4	IMF3	1	1000000	0.00310249
914	4	IMF3	1	900000	0.0111085
915	4	IMF3	1	800000	0.0681436
916	4	IMF3	1	600000	0.0217326
917	4	IMF3	1	400000	0.00814835
918	4	IMF3	1	200000	0.00339745
919	4	IMF3	1	100000	0
920	4	IMF3	1	0	0.0207412
921	4	IMF3	54	1400000	0.00274318
922	4	IMF3	54	1300000	0.0245834
923	4	IMF3	54	1200000	0
924	4	IMF3	54	1100000	0.0032023
925	4	IMF3	54	1000000	0
926	4	IMF3	54	900000	0.00866883
927	4	IMF3	54	800000	0
928	4	IMF3	54	700000	0
929	4	IMF3	54	600000	0
930	4	IMF3	54	500000	0
931	4	IMF3	54	400000	0
932	4	IMF3	54	200000	0.0112802
933	4	IMF3	54	100000	0.00866475
934	4	IMF3	54	0	0.00423785
935	4	IMF3	120	0	0.017617
936	4	IMF3	120	100000	0
937	4	IMF3	120	200000	0
938	4	IMF3	120	300000	0
939	4	IMF3	120	400000	0.0352916
940	4	IMF3	120	600000	0
941	4	IMF3	120	700000	0
942	4	IMF3	120	800000	0.00459406
943	4	IMF3	150	0	0
944	4	IMF3	150	100000	0
945	4	IMF3	150	200000	0.00906717
946	4	IMF3	150	300000	0.0410256
947	4	IMF3	57	600000	0
948	4	IMF3	57	500000	0
949	4	IMF3	57	400000	0.0155971
950	4	IMF3	57	300000	0
951	4	IMF3	57	100000	0.00675647
952	4	IMF3	254a	100000	0.0191243
953	4	IMF3	254a	0	0
954	4	IMF3	154	500000	0.0148287
955	4	IMF3	154	400000	0.00277756
956	4	IMF3	154	200000	0.00316581
957	4	IMF3	154	100000	0
958	4	IMF3	154	0	0
959	4	IMF3	110	0	0.00830676
960	4	IMF3	110	100000	0
961	4	IMF3	110	200000	0.00537335
962	4	IMF3	110	400000	0.00501023
963	4	IMF3	177	0	0
964	4	IMF3	177	100000	0.00591717
965	4	IMF3	177	200000	0
966	4	IMF3	177	300000	0.00403278
967	4	IMF3	177	400000	0.00660873
968	4	IMF3	6a	2300000	0
969	4	IMF3	6a	2200000	0.011096
970	4	IMF3	6a	2100000	0.00822021
971	4	IMF3	6a	2000000	0.00430295
972	4	IMF3	6a	1900000	0
973	4	IMF3	6a	1800000	0
974	4	IMF3	6a	1700000	0.00569021
975	4	IMF3	6a	1400000	0
976	4	IMF3	6a	1300000	0
977	4	IMF3	6a	1200000	0.0145529
978	4	IMF3	6a	1000000	0.0049496
979	4	IMF3	6a	900000	0
980	4	IMF3	6a	800000	0
981	4	IMF3	6a	700000	0
982	4	IMF3	6a	600000	0.0355172
983	4	IMF3	6a	500000	0.013092
984	4	IMF3	6a	300000	0.0201601
985	4	IMF3	6a	200000	0.0288417
986	4	IMF3	70c	100000	0
987	4	IMF3	55b	100000	0
988	4	IMF3	55b	200000	0.00329771
989	4	IMF3	55b	300000	0.00513216
990	4	IMF3	55b	400000	0.00696473
991	4	IMF3	55b	500000	0.0190058
992	4	IMF3	346	0	0
993	4	IMF3	346	100000	0.00262021
994	4	IMF3	320	0	0
995	4	IMF3	320	100000	0
996	4	IMF3	96a	0	0
997	4	IMF3	96a	100000	0
998	4	IMF3	96a	200000	0.0191515
999	4	IMF3	96a	400000	0.020567
1000	4	IMF3	96a	500000	0
1001	4	IMF3	96a	600000	0.00836866
1002	4	IMF3	96a	700000	0.0254905
1003	4	IMF3	96a	800000	0.0758037
1004	4	IMF3	85	1100000	0
1005	4	IMF3	85	1000000	0.00588932
1006	4	IMF3	85	900000	0.0446979
1007	4	IMF3	1287	0	0.0224627
1008	4	IMF3	196	500000	0.107694
1009	4	IMF3	196	0	0.143586
1010	4	IMF3	638	0	-3969.64
2648	4	DUNTIL	1	4900000	6.53697e-05
2649	4	DUNTIL	1	4800000	0
2650	4	DUNTIL	1	4700000	0.0050187
2651	4	DUNTIL	1	4600000	0.00242944
2652	4	DUNTIL	1	4500000	0.00485874
2653	4	DUNTIL	1	4400000	0
2654	4	DUNTIL	1	4300000	0.0161882
2655	4	DUNTIL	1	4200000	0.00513674
2656	4	DUNTIL	1	4000000	0.0106621
2657	4	DUNTIL	1	3900000	0
2658	4	DUNTIL	1	3800000	0.016799
2659	4	DUNTIL	1	3700000	0.00300823
2660	4	DUNTIL	1	3600000	0.00331501
2661	4	DUNTIL	1	3500000	0.00380843
2662	4	DUNTIL	1	3400000	0.0133829
2663	4	DUNTIL	1	3300000	0.00410012
2664	4	DUNTIL	1	3200000	0.00380805
2665	4	DUNTIL	1	3100000	0.009402
2666	4	DUNTIL	1	3000000	0.0126742
2667	4	DUNTIL	1	2900000	0.0136144
2668	4	DUNTIL	1	2800000	0.00479648
2669	4	DUNTIL	1	2700000	0.00321141
2670	4	DUNTIL	1	2600000	0.00645747
2671	4	DUNTIL	1	2500000	0.0313364
2672	4	DUNTIL	1	2400000	0.00833774
2673	4	DUNTIL	1	2300000	0.00765678
2674	4	DUNTIL	1	2200000	0.00483384
2675	4	DUNTIL	1	2100000	0
2676	4	DUNTIL	1	2000000	0.00240245
2677	4	DUNTIL	1	1900000	0.0161124
2678	4	DUNTIL	1	1800000	0.00750847
2679	4	DUNTIL	1	1700000	0.0164075
2680	4	DUNTIL	1	1600000	0.00592915
2681	4	DUNTIL	1	1500000	0.0213696
2682	4	DUNTIL	1	1400000	0.00457857
2683	4	DUNTIL	1	1300000	0.0177099
2684	4	DUNTIL	1	1200000	0
2685	4	DUNTIL	1	1100000	0.0296994
2686	4	DUNTIL	1	1000000	0.00166317
2687	4	DUNTIL	1	900000	0.00492755
2688	4	DUNTIL	1	800000	0.00485665
2689	4	DUNTIL	1	700000	0
2690	4	DUNTIL	1	600000	0
2691	4	DUNTIL	1	500000	0.00861344
2692	4	DUNTIL	1	400000	0.00850196
2693	4	DUNTIL	1	300000	0
2694	4	DUNTIL	1	200000	0.00494373
2695	4	DUNTIL	1	100000	0
2696	4	DUNTIL	1	0	0
2697	4	DUNTIL	54	1400000	0.00292931
2698	4	DUNTIL	54	1300000	0.00532065
2699	4	DUNTIL	54	1200000	0.0088045
2700	4	DUNTIL	54	1100000	0.00134035
2701	4	DUNTIL	54	1000000	0.018898
2702	4	DUNTIL	54	900000	0
2703	4	DUNTIL	54	800000	0.00196259
2704	4	DUNTIL	54	700000	0.00508779
2705	4	DUNTIL	54	600000	0.00479704
2706	4	DUNTIL	54	500000	0.0074556
2707	4	DUNTIL	54	300000	0
2708	4	DUNTIL	54	200000	0.00483755
2709	4	DUNTIL	54	100000	0
2710	4	DUNTIL	54	0	0
2711	4	DUNTIL	120	800000	0
2712	4	DUNTIL	120	700000	0
2713	4	DUNTIL	120	600000	0
2714	4	DUNTIL	120	400000	0
2715	4	DUNTIL	120	300000	0
2716	4	DUNTIL	120	200000	0
2717	4	DUNTIL	120	100000	0
2718	4	DUNTIL	120	0	0.00664022
2719	4	DUNTIL	150	300000	0.0165477
2720	4	DUNTIL	150	0	0.00329552
2721	4	DUNTIL	57	100000	0
2722	4	DUNTIL	57	300000	0
2723	4	DUNTIL	57	400000	0
2724	4	DUNTIL	57	500000	0
2725	4	DUNTIL	57	600000	0
2726	4	DUNTIL	57	700000	0.00354379
2727	4	DUNTIL	57	1300000	0.0111772
2728	4	DUNTIL	254a	100000	0.00847656
2729	4	DUNTIL	254a	0	0
2730	4	DUNTIL	110	600000	0
2731	4	DUNTIL	110	300000	0.00542165
2732	4	DUNTIL	110	200000	0
2733	4	DUNTIL	110	0	0
2734	4	DUNTIL	154	500000	0
2735	4	DUNTIL	154	400000	0
2736	4	DUNTIL	154	300000	0.00664538
2737	4	DUNTIL	154	200000	0
2738	4	DUNTIL	154	0	0.0044614
2739	4	DUNTIL	177	400000	0
2740	4	DUNTIL	177	300000	0
2741	4	DUNTIL	177	200000	0
2742	4	DUNTIL	177	100000	0.00489625
2743	4	DUNTIL	177	0	0
2744	4	DUNTIL	6a	2300000	0.00252385
2745	4	DUNTIL	6a	2200000	0.0024892
2746	4	DUNTIL	6a	2100000	0
2747	4	DUNTIL	6a	2000000	0
2748	4	DUNTIL	6a	1900000	0.00253605
2749	4	DUNTIL	6a	1800000	0
2750	4	DUNTIL	6a	1700000	0
2751	4	DUNTIL	6a	1600000	0.0198574
2752	4	DUNTIL	6a	1300000	0
2753	4	DUNTIL	6a	1200000	0
2754	4	DUNTIL	6a	1100000	0
2755	4	DUNTIL	6a	1000000	0.0097766
2756	4	DUNTIL	6a	800000	0
2757	4	DUNTIL	6a	700000	0
2758	4	DUNTIL	6a	600000	0
2759	4	DUNTIL	6a	500000	0.0193117
2760	4	DUNTIL	6a	100000	0.0102708
2761	4	DUNTIL	6a	0	0
2762	4	DUNTIL	55b	0	0.0257756
2763	4	DUNTIL	55b	200000	0.00579003
2764	4	DUNTIL	55b	300000	0.00395336
2765	4	DUNTIL	55b	400000	0
2766	4	DUNTIL	55b	500000	0.00736406
2767	4	DUNTIL	55b	1000000	0
2768	4	DUNTIL	346	0	0
2769	4	DUNTIL	346	100000	0
2770	4	DUNTIL	443	0	0
2771	4	DUNTIL	320	100000	0.0196187
2772	4	DUNTIL	320	0	0.00770109
2773	4	DUNTIL	96a	0	0.00439248
2774	4	DUNTIL	96a	100000	0.0161231
2775	4	DUNTIL	96a	200000	0.0158769
2776	4	DUNTIL	96a	300000	0.0243582
2777	4	DUNTIL	96a	500000	0.0132305
2778	4	DUNTIL	96a	600000	0.00960791
2779	4	DUNTIL	96a	700000	0.0154023
2780	4	DUNTIL	96a	800000	0.00558507
2781	4	DUNTIL	96a	900000	0
2782	4	DUNTIL	85	1100000	0.00411849
2783	4	DUNTIL	85	1000000	0.0131728
2784	4	DUNTIL	85	900000	0.00732897
2785	4	DUNTIL	85	700000	0
2786	4	DUNTIL	85	600000	0.0274266
2787	4	DUNTIL	85	200000	0.00871943
2788	4	DUNTIL	85	100000	0
2789	4	DUNTIL	1287	0	0.00698445
2790	4	DUNTIL	196	500000	0.00562794
2791	4	DUNTIL	196	300000	0.0287488
2792	4	DUNTIL	196	0	0
2793	4	DUNTIL	541	0	0.0206324
2794	4	DUNTIL	766	0	0.0241418
2795	4	DUNTIL	44c	200000	0.0126612
2796	4	DUNTIL	384	0	0.00305511
2797	4	DUNTIL	479	0	0
2798	4	DUNTIL	638	0	0.0096554
2799	4	DUNTIL	163	100000	0.0384489
2800	4	DUNTIL	163	400000	0.00598263
2801	4	DUNTIL	163	500000	0.00583748
2802	4	DUNTIL	633	0	0.0949679
2803	4	DUNTIL	682	0	-3970.28
4595	4	IMPR_rils	1	4700000	0.00788567
4596	4	IMPR_rils	1	4600000	0.0160423
4597	4	IMPR_rils	1	4500000	0.00600579
4598	4	IMPR_rils	1	4400000	0.0107095
4599	4	IMPR_rils	1	4300000	0
4600	4	IMPR_rils	1	4200000	0.0227524
4601	4	IMPR_rils	1	4000000	0.0233183
4602	4	IMPR_rils	1	3900000	0
4603	4	IMPR_rils	1	3800000	0.0156372
4604	4	IMPR_rils	1	3700000	0.0317124
4605	4	IMPR_rils	1	3600000	0
4606	4	IMPR_rils	1	3500000	0.0270283
[truncated: 7,045 more rows]
[truncated: 1 more columns]
